# Supplementary material for: KLC4 shapes axon arbors during development and mediates adult behavior
Source: eLife. 2022 Oct 12;11:e74270. doi: 10.7554/eLife.74270 (PMC9596160; doi:10.7554/eLife.74270)
Supplement: Figure 2—source data 1. [file elife-74270-fig2-data1.xlsx]

## Sheet: Sheet1
ROI	KLC4 +/+																																		KLC4-/-
1	16	17	11	15	14	19	13	11	17	15	12	7	12	19	9	13	13	12	18	14	17	11	12	8	10	9	5	14	11	21	13	12			8	9	10	10	6	7	9	8	9	17	11	11	12	12	12
2	9	16	7	8	10	16	11	9	16	9	8	11	12	14	7	9	9	12	11	12	16	7	13	5	9	4	6	9	16	14	11	12			5	8	9	11	9	8	9	6	8	11	6	12	7	7	13
3	11	11	7	9	15	15	8	11	10	10	10	8	10	10	8	10	11	11	15	12	11	7	12	4	5	5	6	10	12	13	9	8			10	5	4	7	9	3	5	5	5	9	6	7	6	10	12
4	7	13	4	10	9	12	9	6	9	8	3	11	12	12	5	6	8	12	12	11	13	4	11	4	7	4	6	12	11	11	7	9			8	3	4	4	6	1	3	3	6	8	2	7	6	8	11
5	7	16	2	14	7	11	7	3	9	5	4	5	5	12	0	4	4	7	6	12	16	2	8	1	2	4	1	9	7	10	3	5			2	3	1	3	3	1	2	0	1	5	2	5	6	7	8
6	1	10	0	7	6	9	3	2	7	5	5	2	5	6	0	2	7	4	2	8	10	0	5	0	2	3	2	4	7	7	2	5			2	3	0	2	2	0	0	0	1	3	0	2	4	3	5
7	1	3	1	3	5	9	2	1	4	4	2	3	5	4	0	3	6	4	2	7	3	1	4	0	1	2	1	2	3	6	1	3			0	0	0	2	2	0	2	1	0	0	0	1	3	1	4
8	0	4	2	0	6	7	2	3	7	3	1	2	4	0	0	0	2	3	4	1	4	2	0	0	1	0	1	1	1	5	0	2			0	0	0	1	1	0	1	0	0	0	0	1	2	1	0
[truncated: 17 more columns]
