# Supplementary material for: KLC4 shapes axon arbors during development and mediates adult behavior
Source: eLife. 2022 Oct 12;11:e74270. doi: 10.7554/eLife.74270 (PMC9596160; doi:10.7554/eLife.74270)
Supplement: Figure 2—source data 2. [file elife-74270-fig2-data2.xlsx]

## Sheet: Sheet1
ROI	DMSO												Kinesore
1	10	13	13	10	7	11	11	9	19	5	7		12	19	6	12	12	18	10	11	10	11	11	15	12	6	5	13	10
2	7	15	12	10	6	10	10	7	14	5	3		13	15	13	13	12	14	8	9	10	10	7	12	7	7	4	12	16
3	6	11	12	8	5	10	7	7	10	5	6		10	9	9	13	8	6	6	8	9	8	7	14	12	7	6	7	10
4	5	16	7	6	7	7	7	3	9	6	5		5	7	5	2	5	2	1	6	9	6	5	15	6	3	5	8	9
5	6	13	8	5	8	3	9	4	7	5	4		2	4	5	3	2	4	2	6	3	3	7	9	1	2	4	4	2
6	3	8	9	3	4	6	5	3	4	5	7		0	6	3	3	5	2	0	2	5	2	1	6	0	1	1	0	1
7	3	6	6	1	2	5	8	5	2	3	5		3	4	6	0	1	3	0	2	1	4	0	2	0	1	0	5	4
8	4	6	5	2	0	3	4	4	2	0	6		2	2	0	0	0	0	0	0	1	3	0	4	0	0	0	0	1
