# Supplementary material for: KLC4 shapes axon arbors during development and mediates adult behavior
Source: eLife. 2022 Oct 12;11:e74270. doi: 10.7554/eLife.74270 (PMC9596160; doi:10.7554/eLife.74270)
Supplement: Figure 3—source data 1. [file elife-74270-fig3-data1.xlsx]

## Sheet: Sheet1
KLC4 -/- GCB	KLC4-/- IB	WT GCB	WT IB
1.93325	0.241657	2.49598	0.713136
1.15019	0.766796	1.78284	1.78284
1.85458	0.927288	1.69491	0
0.52465	0	2.37288	1.35593
1.70399	0	0.454545	1.875
0.492267	0	5	0.909091
3.12919	3.57622	1.79301	1.19534
4.49607	0	2.98834	0.597669
2.14635	0	4.54545	2.5
3.0444	2.02968	1.50301	0.501002
2.02969	0	0.501002	0
2.63158	0.526316	1.50301	0.501002
3.15789	0.526316
1.57895	0.526316
