# Supplementary material for: KLC4 shapes axon arbors during development and mediates adult behavior
Source: eLife. 2022 Oct 12;11:e74270. doi: 10.7554/eLife.74270 (PMC9596160; doi:10.7554/eLife.74270)
Supplement: Figure 3—source data 2. [file elife-74270-fig3-data2.xlsx]

## Sheet: Sheet1
KLC4-/- GCB	WT GCB	KLC4-/- IB	WT IB
0.125	0.142857	1	0.5
0.666667	0.2	0.5	0.2
0.333333	0	0.333333	0.25
1	0	0.125	0
0.4	0.125	1	0
0.5	0.16667	1	0
0.285714	0.4	0	0
0.5	0.1	1	0
0.666667	0.333333		0
0.333333	0		0
1	0
0.6
0.666667
1
