# Supplementary material for: KLC4 shapes axon arbors during development and mediates adult behavior
Source: eLife. 2022 Oct 12;11:e74270. doi: 10.7554/eLife.74270 (PMC9596160; doi:10.7554/eLife.74270)
Supplement: Figure 3—source data 3. [file elife-74270-fig3-data3.xlsx]

## Sheet: Sheet1
KLC4
073119_001
track #	Velocity (um/min)	Velocity um/hr		X FMI	Y FMI	X endpoint	Y endpoint
1	1.04	62.4		0.61	-0.27	37.456	-16.791
2	0.98	58.8		-0.1	-0.31	-6.027	-18.082
3	0.6	36		0.28	-0.56	9.902	-19.804
4	1.16	69.6		0.4	-0.8	19.804	-40.039
073019_001
track number	velocity (um/min)	um/hr		X FMI	Y FMI	Endpoint X	Enpoint Y
1	0.82	49.2		-0.39	-0.54	-21.014	-29.526
2	0.68	40.8		0.24	-0.76	16.492	-51.072
3	0.88	52.8		0.17	-0.76	14.63	-66.234
4	0.62	37.2		0.37	-0.79	17.822	-37.772
5	0.97	58.2		-0.66	-0.51	-48.944	-37.506
6	0.78	46.8		-0.91	0.22	-47.348	11.438
7	0.63	37.8		-0.74	-0.47	-36.974	-23.408
073019_002
	velocity (um/min)			X FMI	Y FMI	X endpoint	y endpoint
1	0.82	49.2		0.65	-0.64	34.58	-34.048
2	1.49	89.4		-0.81	-0.09	-53.998	-6.118
3	0.7	42		-0.73	-0.16	-51.072	-11.438
4	0.71	42.6		0.66	-0.37	40.432	-22.876
5	0.97	58.2		0.05	-0.49	5.32	-47.614
6	0.77	46.2		-0.61	-0.66	-18.088	-19.684
071819_001
	velocity um/min	velocity um/hr		X FMI	Y FMI	X endpoint	y endpoint
1	0.98	58.8		0.13	-0.81	7.44	-46.5
2	0.88	52.8		0.21	-0.76	10.54	-39.06
3	0.77	46.2		0.46	-0.71	20.77	-32.24
4	0.79	47.4		-0.9	-0.18	-41.54	-8.37
5	0.72	43.2		0.47	-0.74	19.84	-31
WT
050219_001
	velocity (um/min)	velocity (um/hour)		X FMI	Y FMI	X endpoint	y endpoint
1	0.78	46.8		0.48	-0.63	61.135	-80.509
2	0.78	46.8		0.81	-0.2	62.427	-15.068
3	0.64	38.4		0.71	-0.41	56.399	-32.72
4	0.94	56.4		0.43	-0.66	23.249	-35.303
5	0.71	42.6		-0.09	-0.91	-4.736	-47.789
6	0.49	29.4		-0.63	-0.29	-31.429	-14.638
7	0.59	35.4		-0.24	-0.84	-12.485	-43.914
8	0.84	50.4		0.69	0.14	61.566	12.485
051019_001
	velocity (um/min)	velocity um/hr		X FMI	Y FMI	X endpoint	y endpoint
1	0.22	13.2		-0.67	-0.18	-14.652	-3.96
2	0.25	15		-0.19	-0.43	-4.62	-10.56
3	0.34	20.4		0.13	-0.84	3.696	-23.364
4	0.16	9.6		-0.61	-0.47	-8.184	-6.204
5	0.38	22.8		-0.8	-0.33	-30.36	-12.408
6	0.36	21.6		-0.62	-0.49	-19.668	-15.444
7	0.27	16.2		0.64	-0.35	10.032	-5.544
073119_001
	velocity um/min	velocity um/hr		X FMI	Y FMI	X endpoint	y endpoint
1	0.74	44.4		0.02	-0.74	1.191	-53.595
2	0.44	26.4		-0.05	-0.84	-1.985	-36.921
3	0.64	38.4		-0.29	-0.61	-18.659	-38.509
4	0.64	38.4		0.22	-0.83	7.94	-29.378
