# Supplementary material for: KLC4 shapes axon arbors during development and mediates adult behavior
Source: eLife. 2022 Oct 12;11:e74270. doi: 10.7554/eLife.74270 (PMC9596160; doi:10.7554/eLife.74270)
Supplement: Figure 4—source data 1. [file elife-74270-fig4-data1.xlsx]

## Sheet: wt cousin
Angle	embryo 1	embryo 2	embryo 3	embryo 4	embryo 5	embryo 6	embryo 7	embryo 8	embryo 9	embryo 10	embryo 11	embryo 12	embryo 13	embryo 14	embryo 15	embryo 16	embryo 17	embryo 18	embryo 19	embryo 20	embryo 21	embryo 22	embryo 23	embryo 24
-89.5	259	171	183	142	121	155	233	117	352	235	98	211	363	282	529	295	290	371	439	428	416	423	546	340	441	435	320	434	295	626	192	319	188	299	429	396	444	474	794	423
-88.5	279	200	230	169	143	168	231	158	361	192	106	223	229	327	489	292	344	324	508	457	460	380	519	295	519	467	363	426	244	636	221	293	207	292	375	498	455	457	906	373
-87.5	267	200	255	181	141	194	232	106	410	178	150	246	280	301	458	283	316	357	377	439	495	398	477	326	536	517	363	428	261	606	216	314	202	282	353	493	516	532	797	374
-86.5	256	199	337	189	175	179	237	131	463	133	192	226	223	292	468	262	418	336	421	399	496	398	528	425	614	537	421	422	267	612	233	328	223	247	302	487	476	491	844	382
-85.5	259	183	270	264	159	178	237	140	342	165	188	222	217	331	483	268	442	330	382	423	489	533	448	448	562	469	503	499	255	614	209	272	250	275	345	563	466	390	690	432
-84.5	234	187	243	337	189	227	188	171	284	163	218	229	261	344	571	296	450	339	417	465	523	471	384	395	666	518	488	649	352	527	226	286	241	273	359	618	434	421	728	436
-83.5	270	220	292	341	226	146	201	174	333	221	262	193	248	372	582	303	448	314	495	531	465	526	411	481	526	605	515	557	300	513	240	278	266	247	374	523	417	402	749	546
-82.5	248	196	256	273	225	193	183	211	318	152	250	209	304	339	498	323	429	311	516	484	477	514	419	487	534	591	461	545	279	481	231	277	310	281	396	605	522	505	769	450
-81.5	252	224	311	223	279	247	213	214	360	143	297	184	320	376	501	330	499	305	541	468	445	493	458	511	522	685	408	654	303	460	298	240	352	275	405	515	478	479	828	476
-80.5	220	214	300	244	318	248	227	193	373	133	310	157	268	490	592	356	682	373	512	489	512	511	463	454	507	660	368	688	419	514	349	250	301	322	428	542	461	464	896	456
-79.5	253	289	394	262	254	189	263	182	378	114	265	134	242	445	694	396	647	452	548	489	510	561	492	390	464	685	351	811	370	542	305	274	328	412	531	531	493	440	868	529
-78.5	301	275	373	287	260	165	293	208	403	127	228	226	323	440	756	395	570	370	411	510	469	685	458	402	505	676	424	952	352	551	275	311	303	480	528	514	482	457	883	616
-77.5	204	312	325	352	275	182	249	185	383	148	324	192	347	387	688	381	611	421	390	677	519	600	486	344	487	604	504	961	318	489	364	317	331	381	580	501	497	437	847	528
-76.5	336	297	297	401	241	192	266	199	382	150	270	221	293	351	660	415	710	428	334	755	543	655	410	382	536	662	499	948	342	536	409	385	345	372	567	531	504	431	838	556
-75.5	378	278	234	439	236	161	252	222	382	160	290	193	282	442	720	447	723	434	290	915	540	664	394	395	673	664	485	936	315	466	391	361	417	343	597	556	576	432	763	586
-74.5	420	333	218	464	263	222	231	217	335	148	335	206	257	417	603	512	849	432	332	693	408	527	382	431	625	774	510	1031	450	463	373	360	415	364	620	637	583	473	824	443
-73.5	450	274	246	468	236	195	379	209	351	180	293	206	230	349	650	492	924	505	361	623	423	535	370	376	623	778	397	858	596	427	445	303	604	370	469	688	571	488	791	437
-72.5	439	316	246	483	196	166	294	253	354	167	363	173	251	373	653	413	972	417	367	728	449	531	430	349	514	815	457	730	639	375	463	316	584	444	424	659	550	415	831	506
-71.5	528	348	290	446	209	193	259	301	275	152	314	192	220	393	808	420	1045	409	425	651	493	435	389	378	370	883	404	679	665	367	530	292	530	449	419	605	537	433	806	597
-70.5	511	356	264	391	237	112	238	288	332	127	236	202	284	411	630	459	1044	420	374	727	553	399	412	351	388	906	395	666	709	366	771	230	539	474	508	626	679	415	735	618
-69.5	439	402	316	490	258	85	252	275	340	195	263	192	269	490	634	461	1108	435	388	638	562	360	480	407	328	878	441	634	748	389	610	240	474	450	570	677	662	409	702	629
-68.5	406	427	299	562	245	95	317	213	293	191	238	198	378	545	599	504	1146	448	425	610	536	416	638	409	338	873	462	704	798	416	626	244	489	490	502	605	653	361	723	710
-67.5	390	361	344	610	186	119	360	207	231	226	253	230	411	604	706	497	1091	502	379	589	620	389	632	422	356	839	460	726	742	494	565	251	494	569	534	699	650	413	764	645
-66.5	339	276	360	671	198	128	371	241	241	266	292	211	522	597	684	622	1040	508	275	500	608	384	565	383	341	795	411	703	739	467	556	258	426	474	490	637	658	401	678	617
-65.5	327	272	320	719	199	133	367	240	286	261	267	220	593	596	742	642	1053	524	185	437	627	416	556	379	364	741	462	789	732	474	590	315	438	429	477	619	680	415	699	565
-64.5	394	256	420	664	208	172	348	224	304	267	272	209	694	737	756	605	985	530	246	386	661	384	519	306	385	739	477	966	762	487	550	360	501	413	507	597	614	387	812	578
-63.5	350	272	312	615	259	132	287	205	242	222	274	225	595	728	829	502	919	529	247	457	618	299	516	290	385	765	508	954	915	494	588	383	443	373	595	565	611	362	852	547
-62.5	306	304	301	556	254	95	262	200	278	227	284	207	545	764	821	598	936	559	225	490	690	305	551	332	388	834	515	938	859	479	544	345	395	337	462	555	590	368	832	543
-61.5	300	293	268	616	280	144	323	176	269	221	336	257	533	824	929	591	858	535	215	407	610	308	450	371	442	746	478	979	710	427	512	372	430	385	457	501	613	372	731	560
-60.5	285	242	303	681	279	121	345	222	260	235	281	249	505	883	825	634	768	517	192	355	519	300	471	422	402	843	357	967	659	399	526	338	413	408	504	532	575	428	668	577
-59.5	274	216	253	603	267	124	350	188	317	251	208	173	518	848	747	606	779	497	205	368	547	291	609	360	385	787	415	865	629	370	534	332	525	396	440	522	538	418	578	657
-58.5	270	222	212	487	254	129	266	193	306	202	205	186	552	784	831	602	786	446	182	343	516	314	406	388	344	798	347	885	624	389	552	328	751	396	430	516	516	506	647	669
-57.5	257	227	223	478	293	79	253	213	242	202	256	196	553	793	789	546	616	509	140	343	417	340	349	382	421	721	293	789	664	353	545	346	807	417	454	490	501	506	611	669
-56.5	259	156	236	465	299	88	227	184	195	171	183	174	470	708	708	574	573	429	131	363	413	313	328	398	375	691	303	863	699	408	426	404	497	386	543	422	456	387	511	615
-55.5	183	229	247	428	292	69	224	153	181	145	184	153	463	765	749	667	563	372	169	371	371	338	376	390	380	671	269	832	747	415	441	447	482	423	516	421	478	374	528	632
-54.5	180	237	250	440	292	72	277	184	186	149	179	139	557	573	805	584	547	408	160	384	378	357	399	390	343	587	253	882	713	430	483	283	432	400	490	454	460	311	504	672
-53.5	205	283	218	440	269	65	258	195	143	181	198	121	502	550	818	453	643	436	133	339	350	364	444	372	358	696	239	915	728	444	497	251	428	520	431	447	453	291	470	630
-52.5	153	271	275	371	300	69	297	132	140	270	192	87	543	618	732	447	656	403	126	294	321	284	469	309	317	648	250	933	747	412	542	197	310	480	467	419	432	293	454	674
-51.5	130	114	343	323	349	59	336	139	153	228	339	72	460	498	620	455	639	308	132	284	316	289	363	302	258	664	219	837	693	366	456	164	283	532	480	437	531	301	459	629
-50.5	138	127	374	308	318	57	369	166	160	132	254	78	507	491	454	453	604	329	138	255	299	269	365	323	234	635	184	827	665	350	533	162	261	452	472	395	516	317	472	590
-49.5	126	119	330	390	341	56	379	182	156	108	204	118	583	494	447	468	644	399	131	241	333	266	333	321	219	713	198	699	551	275	490	186	223	397	437	418	468	281	410	532
-48.5	126	111	331	450	351	68	322	199	160	97	121	113	463	498	515	391	500	416	129	236	314	252	267	259	185	689	186	683	537	272	415	199	217	417	401	361	435	354	334	582
-47.5	116	123	312	478	339	60	268	152	195	95	97	143	564	487	508	412	387	432	121	264	337	187	272	269	228	632	214	609	589	295	474	186	262	393	372	341	418	381	275	582
-46.5	51	152	202	408	289	59	286	157	182	82	106	92	440	446	451	473	280	387	107	283	241	222	204	245	215	613	177	575	622	270	420	168	203	387	369	286	451	350	268	488
-45.5	49	178	187	374	355	44	312	124	167	102	98	97	407	437	421	453	293	353	82	261	207	242	232	227	228	606	173	545	472	283	365	178	171	431	367	250	406	331	275	413
-44.5	54	135	213	304	284	24	179	75	139	109	113	132	395	487	436	490	224	392	69	253	177	280	247	220	193	535	186	508	463	257	435	134	210	480	315	283	362	382	263	395
-43.5	59	140	192	290	244	19	170	64	138	66	91	33	276	496	424	463	189	448	77	242	173	263	245	226	184	454	189	442	399	267	430	147	208	482	296	278	385	314	251	327
-42.5	65	132	140	277	241	15	169	83	123	44	118	35	303	424	326	483	212	323	60	252	188	231	224	248	217	468	175	450	496	213	436	137	162	473	299	242	371	291	251	326
-41.5	89	118	118	175	166	13	176	82	125	45	105	33	217	361	265	416	180	360	75	216	170	250	239	249	94	439	232	441	553	178	447	159	169	425	336	239	319	338	247	310
-40.5	79	133	107	117	148	15	162	104	124	24	136	44	236	338	172	495	166	333	85	219	160	222	175	220	69	418	212	335	381	189	397	170	112	486	328	237	318	253	209	315
-39.5	67	130	126	116	137	15	172	79	101	18	146	47	233	293	202	486	167	313	111	175	157	227	178	164	82	379	214	278	343	172	414	157	91	517	323	269	241	241	184	296
-38.5	61	123	112	89	147	13	125	79	91	25	142	39	217	247	176	441	172	288	105	181	152	202	144	125	111	346	210	230	328	161	389	130	80	505	339	315	201	178	176	283
-37.5	53	124	96	100	129	17	90	64	95	18	91	35	224	250	167	443	168	242	93	188	146	199	139	112	88	347	206	179	331	153	321	128	92	451	373	362	227	165	204	255
-36.5	78	73	101	98	133	13	112	83	103	18	106	48	144	232	177	287	191	209	72	221	130	245	131	124	84	354	225	158	322	152	239	134	86	471	386	362	196	151	187	261
-35.5	56	73	106	126	130	12	116	86	96	13	73	45	94	204	150	219	162	185	62	203	140	251	131	160	79	321	201	144	315	138	300	124	76	421	272	349	188	163	187	250
-34.5	49	67	96	146	137	12	84	101	76	11	92	34	98	229	137	218	114	199	54	146	120	228	104	144	107	309	215	160	282	145	241	82	93	462	235	289	198	154	138	279
-33.5	55	57	73	107	86	15	117	106	67	15	95	36	91	222	125	199	101	181	63	105	106	182	70	116	62	378	181	154	249	139	180	100	104	450	300	287	235	179	132	197
-32.5	55	51	81	53	87	16	128	144	72	10	125	39	129	248	122	156	103	173	25	110	77	169	67	87	59	359	125	213	216	165	159	100	70	454	221	320	202	169	143	162
-31.5	53	78	92	60	87	8	108	154	51	9	117	55	137	304	106	144	121	171	26	89	108	153	80	110	66	323	129	222	280	136	155	127	65	461	176	304	197	151	108	142
-30.5	52	68	85	58	77	13	97	145	65	12	133	26	170	318	115	135	120	169	20	89	92	122	82	95	65	327	108	211	208	191	135	201	51	416	181	347	222	130	127	163
-29.5	47	51	83	58	70	12	80	176	62	22	128	33	186	324	96	121	130	159	23	85	78	124	107	88	74	319	186	173	127	145	117	131	42	439	184	307	218	136	167	138
-28.5	27	55	121	35	66	11	82	120	72	9	143	28	147	257	85	112	113	161	25	81	96	138	113	73	116	298	226	148	140	159	146	102	48	391	112	253	221	126	183	133
-27.5	22	50	154	72	57	14	103	100	51	7	133	27	125	256	100	89	74	151	19	84	90	133	112	76	49	227	164	158	117	141	160	112	31	342	107	233	224	127	143	125
-26.5	24	42	176	101	44	13	107	103	47	4	157	40	105	261	82	62	49	152	32	80	81	124	76	76	51	251	161	141	117	157	176	93	35	332	105	249	213	135	134	115
-25.5	21	36	82	85	36	9	106	98	39	4	152	37	94	228	85	60	67	157	49	134	53	105	70	80	40	227	115	92	118	202	142	73	29	284	108	242	249	145	114	128
-24.5	23	38	81	69	37	10	115	115	45	3	130	30	77	232	75	65	59	156	95	86	57	95	74	75	33	230	83	87	109	142	164	81	38	271	115	222	220	188	109	123
-23.5	12	35	76	75	30	9	118	93	31	6	135	25	56	230	111	67	59	144	89	84	57	112	59	64	35	212	103	67	136	102	129	76	32	235	92	234	243	169	122	111
-22.5	18	38	68	56	27	6	146	98	27	1	129	27	54	208	87	71	40	138	65	71	48	93	68	71	28	206	116	80	148	86	75	60	52	258	94	226	228	137	124	123
-21.5	18	32	58	39	30	8	122	109	27	1	136	24	52	226	115	122	42	154	64	73	47	116	82	79	32	222	86	52	151	83	83	49	48	255	98	252	206	121	114	116
-20.5	20	33	77	35	50	5	128	109	21	1	130	28	33	198	90	119	51	137	51	77	44	108	48	57	33	217	77	65	128	70	74	48	71	266	83	198	198	105	90	147
-19.5	15	63	70	35	61	6	134	110	20	3	90	20	49	215	80	114	26	181	35	67	58	99	70	74	27	210	70	70	81	67	67	48	53	240	107	162	221	108	88	175
-18.5	30	59	83	30	62	6	162	179	28	2	99	26	53	222	68	126	31	207	35	66	46	121	71	90	25	242	66	75	86	72	61	36	58	221	88	155	224	97	84	152
-17.5	15	36	71	34	72	1	207	115	31	4	76	14	25	216	86	204	30	186	31	65	36	111	57	80	30	216	76	42	70	60	58	41	36	202	89	140	227	87	68	156
-16.5	14	43	58	25	89	6	157	106	33	3	63	23	31	251	81	169	30	172	27	81	34	131	44	67	20	218	75	30	67	63	50	40	26	182	85	168	255	109	63	154
-15.5	11	44	83	27	100	2	146	103	41	3	55	19	28	204	122	114	24	165	22	54	35	133	51	78	18	160	68	43	54	64	41	34	20	207	64	146	202	86	58	160
-14.5	10	58	65	25	100	4	120	89	39	3	62	16	28	199	94	79	42	142	22	58	53	133	30	73	19	150	99	43	62	67	49	31	27	231	64	123	158	52	60	150
-13.5	14	45	83	34	116	7	121	74	27	2	45	20	33	199	86	71	38	149	21	27	56	119	35	82	34	131	84	34	61	73	46	59	13	247	69	123	164	77	47	125
-12.5	19	69	79	16	63	13	93	75	29	6	69	13	28	191	70	49	30	126	21	25	48	129	42	76	20	132	75	47	66	82	62	63	13	189	78	125	153	69	49	112
-11.5	12	77	87	31	83	8	102	69	19	3	51	9	27	177	41	37	40	123	26	32	42	119	42	70	35	134	70	49	63	96	52	60	21	208	73	167	126	63	54	117
-10.5	21	64	48	27	68	10	98	80	21	20	61	11	28	186	49	42	37	129	23	25	43	124	42	76	32	146	67	53	53	74	64	70	16	234	68	153	107	62	45	158
-9.5	24	34	46	20	106	16	108	59	28	34	88	8	19	180	32	23	36	125	18	29	55	127	44	82	28	126	57	37	60	92	53	63	11	213	77	141	149	53	51	151
-8.5	37	36	27	21	122	13	89	74	21	25	113	15	20	198	36	38	34	118	22	21	77	118	42	72	23	145	48	59	62	88	50	84	14	193	89	157	130	71	56	144
-7.5	36	42	18	25	114	16	100	69	23	14	130	10	40	167	34	30	39	127	18	16	64	110	47	77	23	121	62	37	71	78	64	69	24	221	61	125	130	57	57	130
-6.5	32	39	22	27	117	11	104	54	20	13	123	18	49	150	28	19	47	126	31	16	60	137	45	78	16	100	54	37	62	85	58	81	10	219	84	137	141	65	61	153
-5.5	39	32	20	29	114	7	96	72	23	16	125	10	41	150	35	22	66	129	19	36	56	159	31	63	16	158	53	40	46	81	40	83	14	182	77	115	148	81	75	117
-4.5	47	40	12	20	104	8	119	56	25	15	59	7	39	159	25	21	62	117	31	34	74	150	40	62	16	129	57	29	43	75	34	80	13	195	77	94	147	65	55	105
-3.5	63	47	11	1	100	7	120	81	31	14	45	8	36	173	31	22	59	127	32	22	102	130	25	59	22	111	67	43	46	80	34	88	20	190	84	87	135	58	53	137
-2.5	40	43	15	5	122	5	93	79	18	3	63	14	30	129	20	26	68	108	34	22	87	194	48	31	22	134	73	36	47	81	29	73	21	225	52	77	124	50	51	118
-1.5	30	41	12	1	125	5	73	73	19	6	44	9	30	107	31	24	78	106	21	18	89	152	45	36	15	169	75	45	47	87	41	114	20	229	75	66	125	42	70	135
-0.5	19	45	13	3	133	6	47	76	27	2	69	12	22	110	21	25	61	132	35	17	80	118	50	65	16	142	78	32	48	66	42	135	14	201	106	69	134	59	69	107
0.5	24	33	16	3	106	8	54	96	35	2	47	14	32	112	24	22	57	146	37	21	78	94	66	54	16	127	61	29	50	67	51	111	22	169	103	79	129	42	58	93
1.5	22	53	14	6	95	4	49	126	47	8	67	9	21	104	34	33	68	89	34	29	68	98	62	64	24	110	76	23	45	79	47	133	20	164	120	61	152	53	63	86
2.5	27	64	25	4	100	7	58	95	48	4	55	8	24	99	27	41	64	91	50	55	71	91	57	70	19	97	71	29	52	115	43	104	14	152	121	91	174	44	51	92
3.5	36	68	27	2	81	9	54	107	49	8	49	10	24	85	15	59	42	79	50	42	63	96	64	53	14	120	79	15	51	165	47	111	13	131	94	84	200	44	72	99
4.5	36	60	55	1	76	4	63	131	55	7	47	9	28	78	15	44	40	70	45	37	68	90	51	63	15	113	68	23	52	143	51	113	31	139	88	81	162	43	53	102
5.5	44	54	59	3	105	9	57	135	46	16	67	10	25	91	24	44	56	57	50	38	67	94	67	57	18	114	74	14	57	108	47	120	29	114	111	82	160	35	57	88
6.5	40	41	33	4	100	9	73	123	54	6	59	6	41	102	25	52	35	47	59	29	55	96	64	50	13	121	57	18	51	74	49	85	29	121	138	101	147	50	54	90
7.5	45	32	24	5	75	9	74	69	40	2	53	9	30	74	18	57	42	54	41	33	57	83	70	57	20	95	53	13	49	89	54	83	27	135	103	79	152	50	54	85
8.5	64	30	25	4	65	7	55	59	44	0	68	9	28	68	22	57	38	49	57	28	50	62	60	51	16	109	47	11	38	107	49	63	37	127	88	92	163	45	61	100
9.5	55	15	25	10	75	4	80	62	31	1	63	12	27	52	16	57	31	61	75	34	54	83	80	36	15	91	43	5	42	115	47	76	25	114	89	72	139	61	59	104
10.5	82	25	21	11	68	10	91	64	55	1	51	9	31	67	24	67	30	81	64	50	45	75	79	38	15	126	38	5	53	104	40	72	48	94	96	96	145	50	38	100
11.5	65	30	26	12	82	5	127	88	57	0	34	7	39	59	20	58	33	73	53	10	57	61	61	47	27	90	34	1	39	128	42	82	49	94	69	78	134	58	45	90
12.5	52	25	18	6	84	9	141	70	39	2	35	11	28	62	21	73	36	66	57	19	32	64	62	42	22	134	42	5	41	193	36	97	52	97	122	70	128	67	48	113
13.5	66	29	21	6	81	14	138	75	69	0	22	13	38	59	16	78	38	63	67	14	51	72	50	40	12	116	39	4	28	184	49	96	71	89	97	75	132	64	54	97
14.5	42	18	13	7	83	9	138	86	44	1	28	11	34	51	18	57	36	69	51	14	49	75	61	45	19	129	45	5	41	182	63	65	56	88	114	79	119	87	38	102
15.5	34	31	13	8	87	16	162	70	45	3	19	9	39	60	20	55	30	75	69	14	55	67	44	30	18	162	59	12	36	184	49	70	70	79	108	73	105	104	40	117
16.5	44	12	21	8	91	12	172	66	45	1	25	13	50	43	24	49	32	95	75	16	56	69	62	34	16	160	61	6	38	140	36	66	70	83	83	85	131	72	34	92
17.5	37	27	7	10	90	13	166	56	57	0	13	13	40	47	18	38	25	77	47	18	54	68	62	37	20	204	44	6	42	141	41	80	70	76	87	92	120	75	37	102
18.5	52	25	32	8	109	13	208	54	40	4	17	8	39	42	22	41	28	66	44	28	53	76	49	41	27	246	47	9	51	127	34	51	45	97	89	86	111	71	53	111
19.5	57	15	50	7	91	20	242	54	34	2	23	12	44	51	27	72	42	72	51	31	62	83	51	58	21	230	61	11	56	146	47	70	40	87	79	81	111	59	46	106
20.5	76	22	25	11	92	25	192	61	35	2	17	10	55	52	17	40	50	77	44	24	57	70	62	37	15	213	69	8	39	140	36	58	50	73	86	99	123	67	46	115
21.5	74	26	14	11	78	27	184	62	35	3	13	18	35	57	27	39	32	105	44	30	61	92	68	64	15	214	67	11	34	112	34	57	34	75	97	82	117	57	55	121
22.5	45	30	14	4	66	49	206	50	28	1	25	24	46	50	28	36	31	90	35	32	68	64	76	93	14	206	70	8	52	128	36	75	35	80	114	104	116	71	101	124
23.5	26	29	21	7	56	45	155	53	40	6	31	26	38	64	31	29	24	125	49	30	74	74	56	50	19	191	61	15	48	111	34	118	23	70	102	131	141	72	81	111
24.5	44	31	14	10	65	28	128	64	33	3	18	24	44	74	17	33	15	110	32	29	94	73	70	50	14	192	62	9	32	105	41	134	18	70	112	157	147	74	94	98
25.5	62	46	11	6	49	42	135	53	36	1	35	20	65	63	26	32	22	97	55	30	110	98	87	49	30	183	71	14	38	116	47	140	30	80	104	171	174	87	83	104
26.5	46	44	13	4	60	25	147	64	34	3	19	29	45	74	18	40	23	83	61	27	77	103	86	54	23	183	72	8	38	163	39	126	23	84	150	167	166	104	94	120
27.5	30	50	13	2	42	30	147	60	43	1	33	26	46	68	25	39	18	90	57	31	99	96	98	54	31	187	63	16	30	171	68	145	31	96	142	212	156	104	63	119
28.5	29	66	18	5	43	28	154	61	53	1	20	36	49	74	28	49	25	86	99	26	120	111	104	67	23	207	76	11	36	215	67	152	28	91	140	218	162	99	67	104
29.5	33	88	20	8	43	21	180	63	49	2	26	49	64	75	30	35	23	75	103	29	158	81	105	62	28	215	83	18	28	214	88	161	26	83	123	238	187	118	50	114
30.5	35	69	11	4	47	26	194	75	51	7	26	48	83	78	27	43	30	73	148	42	170	79	97	71	29	208	92	22	29	190	59	158	24	78	108	184	179	139	77	133
31.5	41	60	31	12	54	13	206	90	46	2	31	40	71	67	23	72	14	67	158	45	127	103	89	100	28	168	127	26	43	192	51	153	27	107	158	161	178	158	82	116
32.5	38	57	33	6	37	21	160	104	39	6	21	44	72	70	31	74	13	74	135	94	123	92	92	105	35	209	124	35	46	152	46	167	36	99	140	150	198	160	73	115
33.5	18	116	39	9	36	33	164	51	50	0	27	37	93	76	22	73	13	81	139	47	150	83	112	113	54	249	178	21	28	181	37	170	35	142	153	103	209	156	93	124
34.5	15	101	42	11	44	28	140	39	53	11	28	23	70	78	33	50	12	94	115	45	182	109	91	82	53	209	215	36	80	225	31	164	31	122	137	125	209	172	91	139
35.5	22	73	32	13	46	20	151	68	57	5	32	33	64	70	29	46	12	97	121	49	160	104	90	105	55	179	196	35	89	226	26	172	32	130	169	132	252	174	128	171
36.5	25	70	25	9	50	21	126	69	46	7	32	23	98	76	31	60	5	86	140	49	160	112	85	104	55	129	194	42	66	227	28	164	38	154	166	124	219	235	125	158
37.5	24	67	37	20	37	21	182	73	40	9	34	19	105	69	29	47	14	88	125	46	180	156	107	118	83	136	205	49	64	213	30	161	25	183	149	129	305	240	111	145
38.5	19	72	32	19	34	41	155	76	58	10	39	19	101	53	21	29	17	86	133	40	125	145	102	141	58	145	282	62	49	242	49	188	43	166	134	167	303	290	150	165
39.5	15	72	34	22	23	40	162	72	105	12	39	35	57	80	23	38	23	105	164	30	164	127	88	150	78	150	323	83	46	324	37	176	67	129	156	147	251	285	161	189
40.5	26	72	39	41	20	78	170	75	136	28	45	38	58	83	27	51	19	118	147	63	197	158	89	180	72	170	299	115	36	229	51	200	110	153	143	138	195	306	177	190
41.5	49	85	39	51	28	94	189	64	110	40	67	27	53	101	26	37	19	142	148	90	231	155	101	203	76	186	263	132	50	237	50	178	100	175	163	179	171	290	194	195
42.5	45	70	31	66	17	53	281	93	111	34	79	74	45	95	43	33	63	152	154	71	279	137	94	175	86	154	290	152	31	267	57	176	119	190	220	210	195	242	170	221
43.5	43	73	38	40	25	59	198	81	121	27	87	60	42	121	41	27	81	157	180	75	275	164	81	150	103	143	258	122	43	281	59	206	134	179	230	235	160	264	196	277
44.5	87	57	43	52	30	57	168	72	86	30	75	39	32	129	67	41	55	155	200	80	201	166	103	167	102	161	263	99	36	258	49	181	88	187	214	256	181	279	192	240
45.5	113	75	50	69	40	70	194	74	82	53	58	40	30	137	66	34	49	145	167	100	194	207	93	134	99	147	243	108	38	251	50	184	100	204	277	261	193	318	186	241
46.5	65	80	57	69	42	130	162	59	100	55	64	74	26	106	86	61	47	122	178	103	258	233	99	137	113	149	292	105	48	228	54	229	86	245	228	300	207	306	206	219
47.5	67	86	48	70	54	112	165	75	118	58	67	55	20	98	121	158	44	145	223	117	318	268	97	150	179	155	270	131	48	207	71	231	77	225	190	287	243	324	239	252
48.5	57	61	45	67	102	166	166	112	125	53	98	80	20	102	98	130	40	156	231	98	243	266	94	152	138	154	311	115	67	273	145	272	70	256	175	264	228	343	257	318
49.5	79	75	56	43	76	152	186	118	136	46	140	74	23	95	50	133	45	154	219	106	252	220	117	167	101	174	344	127	61	280	91	279	73	247	203	256	194	286	225	220
50.5	76	56	53	66	69	165	196	123	168	53	119	59	34	91	54	174	32	162	220	135	254	226	133	209	89	163	387	102	69	366	83	313	65	261	194	255	216	365	248	211
51.5	72	44	53	62	44	193	164	128	178	42	133	51	43	76	63	138	85	157	197	134	270	244	134	192	100	149	359	98	73	303	53	298	68	289	191	267	239	328	237	204
52.5	77	94	67	58	44	159	139	122	171	54	151	63	43	83	63	100	109	166	199	130	262	261	138	218	93	148	392	96	78	322	60	310	84	248	158	222	234	345	247	217
53.5	82	148	83	71	40	169	155	152	185	85	128	67	50	85	68	110	98	143	222	129	230	357	140	212	126	149	365	98	104	285	54	302	97	212	154	231	195	345	259	211
54.5	92	145	79	66	31	175	171	164	166	46	120	67	50	73	64	113	96	133	192	125	197	272	181	187	138	186	267	101	121	327	50	267	134	174	150	266	257	267	299	203
55.5	108	131	106	69	28	190	183	201	142	44	128	96	66	72	84	166	82	183	198	139	209	222	242	212	128	194	322	106	115	350	69	308	110	195	150	303	260	242	315	185
56.5	62	100	42	66	32	282	195	175	137	64	98	106	88	67	99	136	108	158	195	170	187	254	236	219	164	149	251	88	160	439	66	266	121	179	149	321	267	237	357	197
57.5	57	83	31	81	34	268	215	259	154	66	118	106	115	83	62	195	105	108	197	158	203	234	236	246	207	176	241	88	155	465	67	260	121	180	151	303	355	261	350	178
58.5	77	78	44	70	42	292	202	195	146	88	78	82	120	103	63	153	127	120	181	160	152	199	193	273	226	187	268	87	131	592	66	250	141	221	131	360	407	258	332	174
59.5	98	77	45	87	30	234	170	187	154	156	75	82	107	104	52	159	119	87	215	191	155	197	264	291	253	168	318	86	116	558	52	255	145	245	180	398	315	313	372	198
60.5	121	69	49	87	43	256	174	217	145	153	83	95	110	116	56	154	148	102	205	194	155	174	348	347	267	166	244	90	171	596	90	260	110	215	179	351	241	309	391	198
61.5	99	67	42	135	50	240	159	216	151	174	85	80	121	144	50	181	199	118	337	221	183	194	442	325	284	175	289	87	172	505	103	267	110	216	169	366	252	303	343	223
62.5	105	52	40	171	38	289	176	194	146	150	74	121	107	133	50	236	231	123	287	218	180	169	394	274	221	178	282	99	143	513	137	289	94	197	203	337	222	275	375	327
63.5	91	84	63	166	47	324	165	163	167	179	73	122	98	146	63	257	245	118	317	240	200	180	391	265	272	169	323	109	168	474	181	362	116	184	184	353	212	298	321	294
64.5	97	86	70	139	47	291	146	166	279	172	63	120	105	118	72	228	223	108	270	273	203	271	386	232	320	233	289	105	188	451	215	402	126	176	179	323	179	297	379	269
65.5	109	109	69	138	55	285	163	173	272	178	63	100	117	130	91	208	248	121	226	217	215	426	398	281	352	251	309	137	196	413	196	327	97	183	242	315	177	246	360	296
66.5	113	153	65	153	62	345	170	161	270	328	67	97	95	142	143	187	273	184	278	203	213	379	403	310	380	202	343	134	187	406	159	307	103	174	271	345	185	234	427	311
67.5	127	142	82	142	64	375	183	184	310	387	51	108	113	148	146	173	246	197	299	172	187	378	459	300	359	190	372	138	180	336	157	366	109	176	210	406	228	254	392	310
68.5	117	124	91	158	68	328	163	216	289	255	57	132	91	165	135	198	255	219	269	165	175	286	443	240	343	207	346	139	187	349	141	282	137	178	178	439	260	202	444	317
69.5	132	151	69	175	67	223	158	236	225	236	74	119	98	150	161	200	260	154	252	201	197	280	329	291	353	209	351	136	202	383	144	264	151	206	163	356	309	184	482	370
70.5	123	150	61	219	71	227	171	202	233	233	63	134	79	150	179	171	207	122	270	253	168	295	342	319	451	170	354	169	153	452	160	252	174	195	191	301	247	208	506	349
71.5	124	142	54	199	79	176	211	146	249	303	73	123	90	213	164	145	207	137	241	251	280	315	338	306	436	163	374	161	156	437	192	268	167	235	186	271	217	241	454	311
72.5	140	157	61	172	107	151	184	135	276	265	67	94	97	195	122	169	258	137	263	306	317	258	338	284	438	168	318	147	138	431	187	262	170	201	229	280	257	232	398	281
73.5	200	163	69	197	104	133	182	113	247	261	70	116	87	138	140	149	247	158	347	305	297	283	421	275	471	166	352	166	141	438	193	280	149	198	250	317	251	242	437	270
74.5	185	178	64	239	91	190	190	129	285	325	89	95	97	166	162	173	253	162	348	335	253	398	429	306	392	180	352	200	168	456	190	270	161	137	219	333	235	273	448	288
75.5	197	215	80	235	79	187	205	109	253	309	74	130	86	196	196	190	220	211	353	362	312	363	500	283	400	169	372	230	268	425	222	275	195	205	228	305	205	246	572	265
76.5	199	185	76	227	97	150	168	94	242	281	84	109	81	189	202	183	212	243	348	419	336	429	458	296	410	156	320	202	221	392	233	250	259	200	258	335	207	273	526	258
77.5	195	245	139	241	96	195	184	127	282	320	129	121	76	168	173	269	243	242	299	471	256	425	484	348	370	202	336	207	217	376	206	264	226	187	250	337	237	268	480	280
78.5	164	204	159	168	72	218	177	116	316	291	103	102	124	169	158	262	282	254	336	353	287	375	454	314	427	205	343	210	189	360	218	275	209	171	283	387	231	285	541	298
79.5	179	181	169	165	71	239	284	233	364	281	139	117	197	191	171	199	235	237	350	351	324	432	477	318	414	214	351	227	165	394	246	340	196	187	332	441	255	240	541	279
80.5	241	180	103	178	85	243	260	386	292	308	215	125	180	196	140	229	200	254	327	417	345	460	568	321	437	244	365	226	172	437	201	322	188	242	367	409	268	244	608	310
81.5	443	175	116	178	97	260	226	249	282	321	195	141	174	185	214	256	226	254	324	341	366	360	528	336	455	238	324	250	220	420	174	264	218	177	398	413	279	267	622	356
82.5	265	171	95	174	110	270	218	210	366	327	170	121	162	197	296	237	211	275	385	392	404	369	565	361	472	277	319	268	213	402	202	255	185	194	469	395	358	274	597	291
83.5	236	179	113	190	90	225	248	152	336	391	131	130	175	214	355	202	215	319	315	385	374	428	609	449	380	331	370	301	180	399	188	228	157	230	394	518	428	291	713	275
84.5	245	168	153	183	76	229	194	134	368	426	138	140	159	226	373	245	212	307	316	408	329	363	550	406	428	344	330	300	199	468	185	238	143	208	371	550	421	318	597	304
85.5	268	193	160	213	96	183	145	130	253	366	172	163	197	253	327	258	245	351	352	503	360	357	525	362	436	333	418	332	235	419	237	287	133	245	375	494	443	345	643	362
86.5	217	202	223	173	100	227	166	133	278	274	166	240	186	212	344	239	232	355	345	402	390	399	498	341	410	339	431	349	296	484	228	226	146	224	392	465	442	397	623	345
87.5	183	208	258	155	122	198	176	149	255	300	173	302	215	210	369	252	248	340	285	335	405	447	558	329	435	397	435	293	249	559	226	222	164	288	375	467	457	426	662	369
88.5	246	186	223	137	152	188	190	128	303	375	144	243	314	237	396	260	243	326	344	416	411	416	544	361	489	419	377	375	265	558	206	255	197	263	359	429	477	403	657	398
89.5	283	176	217	134	143	190	195	112	294	361	128	212	425	193	452	290	240	346	438	458	449	386	490	344	487	459	352	371	281	542	194	339	189	207	421	424	431	431	671	403

## Sheet: uw314
Angle	embryo 1	embryo 2	embryo 3	embryo 4	embryo 5	embryo 6	embryo 7	embryo 8	embryo 9	embryo 10	embryo 11	embryo 12	embryo 13	embryo 14	embryo 15	embryo 16	embryo 17	embryo 18	embryo 19	embryo 20	embryo 21	embryo 22	embryo 23
-89.5	247	266	122	203	156	53	135	388	457	202	226	140	185	171	100	197	320	72	292	106	269	167	106
-88.5	251	277	85	149	127	68	138	402	481	161	223	192	260	150	127	172	426	81	235	128	244	185	123
-87.5	280	255	99	156	118	89	149	521	466	163	233	263	252	142	144	168	356	65	271	114	221	132	120
-86.5	277	299	87	191	146	141	150	588	484	182	303	246	194	189	225	157	379	83	287	113	212	157	99
-85.5	277	333	54	225	229	145	135	474	541	172	358	228	146	147	209	152	366	85	293	123	182	131	111
-84.5	190	326	72	177	232	172	131	553	463	182	309	223	109	140	148	143	244	97	427	95	174	143	104
-83.5	242	338	129	196	239	154	122	596	339	201	288	243	130	167	141	143	256	51	317	76	172	166	99
-82.5	247	339	105	166	174	168	131	585	365	215	298	191	112	165	123	142	285	36	276	91	204	148	109
-81.5	299	374	88	205	173	210	179	559	376	289	229	198	102	150	122	192	344	43	293	72	188	130	152
-80.5	211	446	66	247	213	182	240	621	385	261	300	179	80	130	133	121	380	48	297	101	172	119	155
-79.5	191	392	81	296	176	137	248	607	425	225	239	210	117	135	113	111	340	60	274	140	239	88	176
-78.5	228	218	63	297	181	139	289	571	398	223	261	177	97	142	150	103	313	56	301	133	267	85	166
-77.5	242	181	55	229	201	158	276	563	453	232	224	195	95	148	163	90	308	60	334	114	227	75	153
-76.5	282	214	56	225	256	135	191	538	553	293	229	208	101	140	254	83	304	67	349	115	257	90	167
-75.5	312	192	81	252	276	125	194	492	259	330	229	212	95	157	349	85	345	85	393	148	267	92	156
-74.5	298	244	93	241	292	80	191	487	249	394	211	189	103	146	283	107	343	92	484	134	304	92	174
-73.5	297	273	124	246	196	90	183	449	287	333	301	159	126	94	274	125	407	114	417	174	286	112	165
-72.5	353	315	104	218	223	106	198	506	257	395	300	158	153	100	292	130	540	145	430	198	262	139	224
-71.5	407	302	107	254	232	139	262	437	252	401	319	142	146	102	240	109	330	158	401	206	260	108	194
-70.5	349	392	104	290	230	136	238	466	254	459	401	143	142	100	234	89	274	147	416	194	290	108	229
-69.5	308	397	130	273	273	163	250	517	266	442	425	139	123	111	258	110	283	136	354	196	295	107	177
-68.5	286	418	154	249	248	143	234	560	275	452	470	169	121	153	226	126	278	102	337	178	328	95	218
-67.5	214	405	181	191	244	137	230	436	304	424	455	199	132	173	241	111	250	133	385	239	360	122	235
-66.5	271	448	131	189	257	110	258	428	386	371	355	240	135	150	220	98	258	139	392	292	433	136	243
-65.5	258	452	108	181	232	102	275	489	305	381	404	207	155	165	251	113	284	168	397	274	382	151	274
-64.5	248	337	105	176	181	89	293	573	242	395	348	239	145	175	262	128	296	125	374	252	331	147	263
-63.5	254	318	113	190	174	89	326	562	264	422	344	292	157	151	269	151	247	88	401	271	300	143	238
-62.5	232	302	113	199	176	149	223	507	229	480	501	285	155	172	254	163	216	81	349	261	321	167	248
-61.5	259	249	161	242	230	119	188	479	301	529	530	278	156	146	219	140	207	104	381	286	319	154	246
-60.5	276	231	142	244	366	104	193	478	222	440	573	214	169	196	248	125	218	115	456	299	265	159	234
-59.5	289	189	151	167	374	164	198	438	227	451	493	202	169	223	211	145	290	128	467	291	264	180	215
-58.5	281	142	147	201	376	129	227	420	194	461	463	193	160	205	195	134	272	161	347	337	172	127	196
-57.5	223	167	182	228	359	135	290	395	177	416	455	223	136	149	217	146	260	103	275	282	217	111	219
-56.5	224	158	103	266	383	133	389	304	133	408	558	260	142	144	242	147	203	109	250	294	196	125	257
-55.5	214	195	112	254	320	183	326	303	135	419	500	242	135	185	217	151	203	111	298	414	202	164	219
-54.5	214	228	119	255	305	155	259	303	100	507	472	259	131	178	186	159	220	138	351	432	195	126	232
-53.5	182	194	113	249	232	172	212	394	90	467	454	232	103	197	132	230	176	116	338	363	184	114	214
-52.5	232	158	118	259	204	198	216	336	106	446	470	208	90	168	131	191	200	108	351	299	194	116	210
-51.5	239	147	121	247	208	198	240	279	82	395	424	207	69	235	170	187	158	94	290	297	250	107	215
-50.5	213	119	107	280	196	172	183	177	87	510	353	245	78	217	175	162	147	98	325	316	334	104	210
-49.5	180	104	120	205	196	177	209	144	96	547	424	236	81	171	155	148	156	100	295	399	232	164	216
-48.5	174	83	163	187	231	174	206	140	78	384	299	195	89	151	118	150	215	118	257	437	187	94	238
-47.5	218	95	109	177	181	190	197	130	80	400	258	171	82	155	108	138	142	78	284	386	156	84	216
-46.5	204	133	76	159	181	158	223	129	82	248	297	188	67	130	107	125	148	78	272	413	156	78	178
-45.5	221	141	81	124	205	182	235	132	76	245	364	223	79	156	101	127	130	81	291	433	161	94	173
-44.5	166	127	62	127	207	181	233	100	71	233	329	237	72	148	105	116	176	80	284	416	167	124	119
-43.5	174	115	61	165	181	142	267	121	93	221	262	268	79	170	118	119	170	79	340	477	168	103	132
-42.5	164	105	74	197	128	152	263	90	89	229	239	355	58	175	105	159	167	55	358	471	174	127	104
-41.5	168	79	93	137	122	128	256	112	53	164	237	274	54	158	90	162	135	65	236	486	147	112	98
-40.5	146	93	114	99	134	102	251	108	70	141	213	184	48	135	84	136	154	45	256	371	121	98	86
-39.5	138	92	80	98	121	101	209	111	59	155	171	185	38	119	74	149	106	33	280	350	137	93	111
-38.5	138	96	33	128	99	147	193	108	71	112	178	193	48	71	67	91	88	51	329	333	166	64	90
-37.5	107	115	35	142	83	128	148	92	77	125	188	173	43	81	88	90	52	43	249	294	167	78	94
-36.5	93	111	36	126	81	110	152	89	71	108	214	147	48	65	82	75	37	34	222	279	161	90	85
-35.5	82	110	40	127	83	107	165	85	51	116	197	134	43	60	76	75	34	44	172	284	126	106	90
-34.5	82	128	29	154	70	103	150	89	48	123	182	145	39	66	76	66	35	40	165	267	77	77	86
-33.5	77	106	28	223	89	103	187	66	62	137	218	110	28	71	65	35	25	40	170	258	85	89	128
-32.5	80	110	34	191	75	139	122	58	38	124	189	147	43	75	66	41	16	48	172	233	78	104	93
-31.5	60	118	31	101	88	120	100	56	43	115	159	130	43	76	76	38	24	37	182	191	61	110	85
-30.5	52	126	24	85	84	113	100	36	35	106	123	115	42	66	65	34	36	31	144	193	56	101	79
-29.5	51	117	19	62	90	99	77	28	36	130	135	110	35	56	66	50	31	35	112	148	70	93	81
-28.5	55	121	18	58	77	114	69	28	34	98	140	112	36	28	81	35	41	21	100	184	72	97	71
-27.5	49	130	17	53	101	88	93	29	40	84	126	91	39	32	82	44	41	26	113	173	72	103	45
-26.5	54	81	13	56	96	93	92	37	42	81	103	106	40	29	46	43	38	19	114	152	72	65	32
-25.5	45	70	16	67	112	100	88	26	34	88	109	112	43	25	52	54	53	21	119	143	60	77	33
-24.5	53	75	14	64	149	102	69	32	39	79	106	129	54	25	35	49	40	25	120	114	46	59	25
-23.5	49	74	14	46	132	81	62	29	30	71	130	90	50	26	52	43	16	24	119	96	81	69	22
-22.5	86	85	14	49	110	87	64	29	22	88	153	72	58	34	52	45	17	32	144	106	60	85	11
-21.5	59	75	10	72	95	85	56	27	18	117	149	91	59	28	67	38	14	22	129	95	47	71	21
-20.5	63	78	16	52	106	56	57	22	27	109	129	118	39	12	59	40	15	26	133	93	38	70	17
-19.5	66	79	16	51	96	46	55	22	27	87	110	75	27	10	42	37	16	30	125	91	39	105	24
-18.5	76	103	12	64	110	29	48	20	14	76	96	59	30	12	51	43	25	25	119	86	33	73	12
-17.5	53	69	11	68	107	24	45	22	14	69	99	76	34	5	64	32	16	29	100	109	32	68	18
-16.5	51	69	12	68	93	33	49	28	19	66	149	65	34	15	49	42	48	21	95	98	24	62	20
-15.5	66	46	14	64	85	20	55	28	19	72	65	66	42	13	46	62	19	18	80	97	27	45	16
-14.5	53	45	10	56	71	25	50	28	24	71	27	81	33	13	47	56	26	21	73	114	26	55	21
-13.5	81	36	15	45	54	81	43	31	32	81	25	83	36	10	53	59	6	14	87	103	22	40	19
-12.5	27	45	12	46	61	81	69	31	18	96	36	89	54	14	64	74	14	25	74	106	13	56	28
-11.5	34	44	6	47	57	53	82	24	36	78	38	57	35	11	46	46	9	26	68	136	13	60	26
-10.5	28	40	12	60	83	45	33	10	37	120	38	69	37	17	64	41	15	24	81	125	19	77	16
-9.5	23	31	12	46	90	34	26	26	53	81	37	79	47	15	77	36	14	31	78	106	18	54	16
-8.5	19	58	14	46	105	29	23	22	55	49	38	72	52	12	70	34	9	25	68	72	9	47	10
-7.5	24	54	16	47	52	19	26	14	65	70	37	79	25	16	77	34	10	23	54	88	10	42	14
-6.5	23	63	16	52	42	11	17	13	41	48	32	69	54	11	99	33	9	18	61	134	12	57	11
-5.5	33	48	18	38	55	14	18	18	49	57	34	58	56	15	104	35	7	12	60	130	15	39	13
-4.5	15	71	10	46	43	14	15	18	57	69	52	57	84	21	121	25	10	13	64	78	17	45	15
-3.5	23	49	25	34	63	9	19	9	68	54	30	45	120	16	165	33	11	15	46	57	21	46	10
-2.5	37	45	13	60	56	10	13	8	29	62	48	69	65	16	111	16	18	6	50	53	29	40	9
-1.5	21	69	22	72	71	6	12	11	52	62	23	58	58	16	146	26	15	12	56	57	27	29	15
-0.5	32	60	17	69	86	10	4	8	36	86	42	38	43	14	156	21	17	10	64	51	29	51	13
0.5	31	33	17	43	82	7	9	5	43	79	41	32	54	16	174	27	15	12	67	44	35	41	10
1.5	40	51	12	33	72	10	3	8	27	97	47	59	47	14	315	19	14	13	82	43	34	56	12
2.5	19	52	19	31	81	4	3	7	29	72	40	52	49	16	289	28	11	9	62	40	26	48	11
3.5	29	55	13	22	28	8	6	13	42	74	42	55	51	17	258	22	20	20	83	50	26	45	5
4.5	21	68	18	31	26	7	13	7	44	59	46	62	35	13	191	27	10	11	90	30	25	45	4
5.5	26	51	19	38	30	5	8	8	21	75	42	40	45	9	184	32	19	6	94	35	28	59	11
6.5	20	34	13	48	36	3	7	4	18	82	30	44	47	13	164	54	17	7	95	29	21	70	8
7.5	26	36	19	59	37	2	3	11	25	53	36	56	48	17	164	39	14	9	100	37	22	58	12
8.5	40	20	19	84	44	1	6	10	27	48	22	33	58	14	144	45	14	5	114	26	32	52	9
9.5	56	7	23	34	18	4	3	13	19	56	42	38	42	15	120	15	10	7	110	22	21	73	19
10.5	67	14	14	49	17	3	13	14	27	49	31	35	46	14	124	16	3	11	79	25	35	54	7
11.5	59	7	9	52	33	4	13	11	26	49	35	23	58	13	129	17	9	17	79	23	51	61	10
12.5	37	12	17	75	35	6	0	9	30	69	43	18	62	20	152	19	5	11	66	29	34	62	6
13.5	31	11	16	60	42	3	4	14	41	45	54	16	55	16	98	15	15	11	71	20	36	57	12
14.5	42	4	18	41	40	3	6	7	29	67	47	8	140	19	54	32	7	10	85	35	34	48	9
15.5	37	5	9	49	50	3	4	10	22	52	42	11	96	23	38	35	11	6	60	28	41	57	16
16.5	22	4	7	34	41	3	1	7	15	74	45	14	77	11	37	40	11	4	75	37	37	48	8
17.5	22	6	5	25	32	4	8	12	20	88	56	4	59	20	46	34	15	9	59	24	41	41	13
18.5	20	11	10	18	41	3	11	12	21	92	46	13	78	25	37	44	11	8	60	31	32	51	18
19.5	32	10	14	15	28	4	5	12	31	78	44	10	61	37	40	50	9	11	88	33	54	45	24
20.5	25	7	15	15	56	5	1	9	22	89	53	11	54	40	45	75	13	10	59	42	36	36	20
21.5	36	4	45	9	43	2	3	11	23	96	42	10	48	32	66	45	8	12	65	40	56	53	27
22.5	33	10	26	15	42	13	3	28	26	107	36	10	41	37	73	36	13	13	63	36	32	52	38
23.5	42	4	27	17	49	18	1	34	18	92	33	10	50	34	95	29	19	17	99	30	50	42	48
24.5	41	6	18	14	48	21	1	41	25	112	24	17	42	18	65	29	16	14	97	34	54	57	37
25.5	34	7	20	11	31	22	1	53	31	94	31	18	49	26	59	20	13	11	116	29	52	33	27
26.5	37	3	10	10	66	28	4	21	25	111	39	11	79	30	63	24	11	22	107	43	43	42	24
27.5	33	11	17	12	71	28	2	21	13	108	39	11	68	26	70	24	7	18	129	38	65	50	20
28.5	11	6	17	15	90	31	1	17	15	113	26	11	88	21	95	29	11	21	128	50	67	51	38
29.5	17	6	12	16	97	26	3	23	29	107	35	13	87	32	95	42	8	27	125	33	72	52	52
30.5	10	6	17	21	152	18	3	18	18	105	31	9	81	41	64	26	7	24	107	44	77	65	46
31.5	13	5	16	16	146	20	5	16	21	102	26	9	64	73	63	26	15	30	96	49	84	73	46
32.5	9	7	19	29	120	19	6	19	17	126	30	11	72	84	71	26	11	33	112	43	89	82	52
33.5	10	6	22	32	97	16	10	22	29	120	21	17	59	106	49	25	19	47	122	42	106	77	45
34.5	11	6	34	75	104	21	28	24	46	103	23	10	63	124	61	44	28	40	118	60	93	118	64
35.5	8	6	28	86	99	19	57	15	51	97	32	9	79	140	90	108	14	32	95	34	90	94	42
36.5	9	7	27	58	96	21	8	16	75	107	30	23	73	215	88	77	10	38	115	52	105	60	59
37.5	12	10	22	71	104	32	24	26	128	109	24	20	93	140	89	70	7	63	133	47	131	32	53
38.5	12	7	26	82	87	33	24	27	126	82	38	17	98	148	96	71	7	59	127	47	110	30	58
39.5	18	13	23	71	91	32	29	21	108	102	41	25	113	180	102	62	11	46	145	59	144	52	81
40.5	18	11	38	71	81	42	25	37	83	138	35	26	107	189	122	60	23	41	161	55	140	58	133
41.5	13	8	43	55	62	62	35	35	63	115	30	16	102	144	126	44	11	39	201	50	153	50	78
42.5	41	5	50	97	55	74	32	43	71	95	16	29	108	164	105	54	12	35	240	51	126	46	99
43.5	35	9	42	132	56	61	47	43	65	78	19	36	117	160	109	49	12	31	207	58	108	41	96
44.5	30	12	61	138	38	52	45	37	65	74	28	44	137	197	97	61	6	37	229	70	110	43	63
45.5	37	8	48	126	54	43	46	45	51	84	32	50	154	165	113	64	12	34	246	52	114	33	50
46.5	32	10	38	112	61	41	55	53	38	75	42	60	199	175	119	79	10	37	277	38	118	45	53
47.5	29	8	47	79	83	47	50	41	44	99	45	81	120	198	141	85	11	28	290	37	115	39	44
48.5	26	7	48	77	65	40	66	63	42	78	38	85	125	155	133	79	37	57	312	44	121	61	42
49.5	29	16	49	73	60	39	70	59	59	71	41	93	134	146	119	84	68	69	250	28	127	64	42
50.5	28	66	56	74	67	29	67	94	51	76	46	85	123	142	107	97	51	119	242	28	112	76	40
51.5	25	41	54	69	59	41	70	124	52	63	49	86	124	122	107	66	36	127	245	19	139	95	37
52.5	45	35	69	65	78	37	63	131	66	85	45	88	130	125	132	70	57	111	200	26	105	114	50
53.5	27	69	137	103	47	37	67	96	65	80	62	69	129	133	180	67	60	106	208	26	102	113	48
54.5	24	59	139	134	69	30	66	103	62	107	88	68	150	110	193	65	51	148	220	19	94	125	55
55.5	19	80	119	107	69	38	76	112	78	89	79	65	131	111	209	89	69	120	194	28	88	177	38
56.5	22	55	116	109	67	48	74	100	150	115	98	66	109	98	169	84	138	98	184	24	95	231	60
57.5	14	67	111	85	77	51	88	91	227	111	103	68	85	99	140	66	97	106	184	32	102	135	62
58.5	11	44	100	91	76	51	110	118	226	129	101	70	91	99	147	55	80	104	168	49	100	106	111
59.5	15	44	63	91	59	53	131	106	267	150	66	71	83	88	162	78	90	103	164	50	90	93	135
60.5	17	49	86	138	55	78	125	122	266	153	79	83	77	115	148	139	84	127	155	56	99	86	100
61.5	15	48	71	122	54	87	79	154	235	221	85	71	82	110	162	109	73	147	162	55	95	143	99
62.5	27	37	56	145	55	97	86	154	222	228	73	71	103	98	144	97	118	149	173	38	117	80	89
63.5	37	56	64	167	58	83	72	161	239	208	81	62	75	64	130	78	96	173	184	46	137	62	88
64.5	42	57	46	147	66	73	79	182	225	165	86	70	106	79	168	80	87	145	212	40	147	69	107
65.5	36	32	47	154	70	73	97	154	237	142	84	72	93	89	178	89	73	171	210	33	131	53	87
66.5	42	27	73	162	64	76	159	176	294	116	61	62	73	73	152	115	68	151	253	59	133	48	98
67.5	32	28	47	206	77	64	165	222	283	140	66	76	81	58	166	73	65	173	272	54	113	49	83
68.5	30	24	56	216	86	55	167	229	287	110	75	90	74	71	132	61	119	157	296	47	117	40	63
69.5	39	27	53	236	68	62	146	237	356	107	74	104	85	60	134	76	156	170	302	51	132	53	60
70.5	49	27	63	174	82	60	147	292	311	108	81	87	61	58	124	73	154	160	277	52	133	55	64
71.5	47	41	71	170	87	63	173	342	370	103	82	104	86	64	205	90	150	163	368	54	165	66	83
72.5	62	56	59	161	93	79	200	305	357	141	67	106	76	70	253	84	137	155	392	53	155	59	81
73.5	47	70	66	180	98	68	186	368	299	163	67	88	98	77	206	77	161	136	357	60	190	69	81
74.5	65	77	45	169	138	52	121	339	299	146	77	85	97	72	218	74	179	113	379	58	197	72	87
75.5	61	80	54	168	185	52	156	352	299	162	77	69	165	66	180	69	169	106	376	63	197	87	73
76.5	85	123	59	162	136	49	132	416	302	170	84	76	169	91	198	69	158	102	368	62	205	67	86
77.5	117	121	57	169	105	39	135	391	301	227	75	100	153	82	208	141	144	85	324	64	196	64	109
78.5	158	115	73	206	90	48	157	404	320	142	73	83	136	76	175	98	155	72	273	77	204	71	76
79.5	125	124	55	310	99	32	159	494	330	137	68	91	141	86	249	112	171	66	249	62	179	68	88
80.5	141	150	70	282	72	48	122	434	379	125	70	83	222	90	231	99	161	65	267	69	205	90	104
81.5	151	194	84	233	69	52	146	417	400	141	65	90	309	80	245	76	174	61	221	66	194	80	99
82.5	156	256	86	255	98	42	174	372	411	150	83	99	205	98	239	79	201	67	236	69	239	87	115
83.5	147	271	61	281	123	48	163	402	327	169	99	113	166	75	207	91	194	60	197	68	233	86	91
84.5	214	216	61	299	106	47	175	372	318	174	99	119	165	80	153	101	203	52	225	81	186	106	88
85.5	276	224	70	195	93	35	159	378	351	147	145	118	224	98	131	98	199	70	211	84	205	117	90
86.5	347	213	82	137	88	64	182	395	307	181	186	118	223	79	171	94	212	79	240	89	183	96	91
87.5	249	196	122	160	99	55	194	433	525	148	232	113	249	112	159	91	203	57	251	128	196	108	142
88.5	234	311	172	170	158	53	213	427	500	196	231	113	278	100	141	154	223	80	255	105	215	106	227
89.5	289	261	114	195	148	70	176	417	477	185	246	117	260	151	83	252	161	94	278	102	258	169	147
