# Supplementary material for: KLC4 shapes axon arbors during development and mediates adult behavior
Source: eLife. 2022 Oct 12;11:e74270. doi: 10.7554/eLife.74270 (PMC9596160; doi:10.7554/eLife.74270)
Supplement: Figure 4—source data 2. — Presented as a percentage of total signal. [file elife-74270-fig4-data2.xlsx]

## Sheet: wt cousin
Angle	embryo 1	embryo 2	embryo 3	embryo 4	embryo 5	embryo 6	embryo 7	embryo 8	embryo 9	embryo 10	embryo 11	embryo 12	embryo 13	embryo 14	embryo 15	embryo 16	embryo 17	embryo 18	embryo 19	embryo 20	embryo 21	embryo 22	embryo 23	embryo 24
-89.5	0.842425	1.14506	0.774737	0.489942	0.548479	0.889986	0.71182	0.496984	1.26491	0.451863	1.27634	1.35049	1.21397	0.0643187	1.24788	0.770175	0.653374	0.933216	1.39109	1.11458	0.995692	0.97425	1.26515	0.91447
-88.5	1.05879	1.23348	0.906125	0.5831	0.648203	0.96463	0.70571	0.671141	1.29725	0.48875	1.0428	1.42729	0.765835	0.0745823	1.15352	0.762342	0.775037	0.814992	1.60973	1.1901	1.10101	0.875213	1.20259	0.793437
-87.5	1.17387	1.18042	0.906125	0.624504	0.639137	1.11392	0.708765	0.450259	1.47334	0.691627	0.966761	1.5745	0.936392	0.0686522	1.08039	0.738846	0.711952	0.898	1.19463	1.14323	1.18478	0.916671	1.10527	0.876815
-86.5	1.55135	1.13179	0.901595	0.652106	0.793255	1.02779	0.72404	0.556452	1.66379	0.885282	0.722355	1.44649	0.74577	0.0665995	1.10398	0.68402	0.94176	0.845177	1.33405	1.03906	1.18717	0.916671	1.22344	1.14309
-85.5	1.24292	1.14506	0.829105	0.910879	0.720729	1.02205	0.72404	0.594682	1.22898	0.866839	0.896155	1.42089	0.725704	0.0754946	1.13937	0.699684	0.995832	0.830084	1.21047	1.10156	1.17042	1.2276	1.03807	1.20495
-84.5	1.11863	1.03453	0.847227	1.16275	0.856715	1.3034	0.574344	0.726361	1.02055	1.00516	0.885292	1.46569	0.872851	0.0784596	1.34695	0.772785	1.01386	0.852723	1.32138	1.21094	1.2518	1.0848	0.889775	1.0624
-83.5	1.3442	1.19369	0.996738	1.17655	1.02443	0.83831	0.614059	0.739105	1.19664	1.20804	1.2003	1.23528	0.829376	0.0848459	1.3729	0.791061	1.00935	0.789838	1.56854	1.38281	1.11297	1.21148	0.952337	1.29371
-82.5	1.17847	1.09642	0.888003	0.941931	1.0199	1.10818	0.559069	0.89627	1.14273	1.15271	0.825549	1.33769	1.01665	0.0773192	1.17475	0.843276	0.966543	0.782292	1.63508	1.26042	1.14169	1.18384	0.970874	1.30984
-81.5	1.43166	1.11411	1.01486	0.769417	1.26468	1.41824	0.650719	0.909014	1.29366	1.36942	0.776667	1.17768	1.07016	0.0857582	1.18183	0.861551	1.12425	0.767199	1.7143	1.21875	1.0651	1.13547	1.06124	1.37439
-80.5	1.38102	0.972634	0.969554	0.841873	1.44146	1.42398	0.69349	0.819811	1.34038	1.42936	0.722355	1.00486	0.896261	0.111759	1.39649	0.929431	1.53656	0.938247	1.62241	1.27344	1.22547	1.17693	1.07283	1.22109
-79.5	1.81375	1.11853	1.30935	0.903978	1.15135	1.08521	0.803471	0.773086	1.35834	1.22187	0.619161	0.857655	0.80931	0.101496	1.6371	1.03386	1.4577	1.13696	1.73649	1.27344	1.22068	1.29209	1.14002	1.04895
-78.5	1.71707	1.33074	1.24592	0.990236	1.17855	0.947405	0.895121	0.883527	1.44818	1.05127	0.689768	1.44649	1.0802	0.100355	1.78336	1.03125	1.28422	0.930701	1.30236	1.32812	1.12255	1.57769	1.06124	1.08123
-77.5	1.49611	0.901897	1.41356	1.21451	1.24654	1.04502	0.7607	0.78583	1.37631	1.49391	0.803824	1.22888	1.16046	0.0882671	1.62295	0.9947	1.37659	1.05899	1.23582	1.76302	1.24222	1.38192	1.12612	0.925229
-76.5	1.36721	1.48548	1.3456	1.38357	1.09243	1.10243	0.812636	0.845298	1.37272	1.24493	0.814686	1.41449	0.979868	0.0800562	1.5569	1.08347	1.59964	1.07659	1.05837	1.96615	1.29966	1.50859	0.95002	1.02743
-75.5	1.0772	1.67116	1.25951	1.51468	1.06976	0.924437	0.769865	0.942995	1.37272	1.33714	0.868998	1.23528	0.943081	0.100812	1.69843	1.16701	1.62893	1.09169	0.918943	2.38281	1.29248	1.52932	0.912946	1.0624
-74.5	1.00354	1.85685	1.5087	1.60094	1.19215	1.27469	0.70571	0.921757	1.20382	1.54463	0.803824	1.31848	0.859474	0.0951095	1.42244	1.33671	1.91281	1.08666	1.05203	1.80469	0.976544	1.21378	0.88514	1.15923
-73.5	1.13244	1.98948	1.24139	1.61474	1.06976	1.11966	1.15785	0.887775	1.26132	1.35098	0.977623	1.31848	0.769179	0.0796	1.53331	1.28449	2.08178	1.27028	1.14393	1.6224	1.01245	1.23221	0.857335	1.0113
-72.5	1.13244	1.94085	1.43168	1.66649	0.888446	0.953147	0.898176	1.07468	1.2721	1.67374	0.907017	1.10727	0.839409	0.085074	1.54038	1.07824	2.18993	1.04892	1.16294	1.89583	1.07468	1.223	0.996362	0.938677
-71.5	1.33499	2.33432	1.57666	1.53883	0.947373	1.10818	0.79125	1.27857	0.988213	1.44781	0.825549	1.22888	0.735737	0.0896356	1.90602	1.09652	2.3544	1.0288	1.34673	1.69531	1.17999	1.00189	0.90136	1.01668
-70.5	1.2153	2.25916	1.6129	1.34907	1.07429	0.643087	0.727095	1.22335	1.19304	1.08816	0.689768	1.29288	0.949769	0.093741	1.48613	1.19834	2.35215	1.05647	1.18512	1.89323	1.3236	0.918974	0.954654	0.944056
-69.5	1.45468	1.94085	1.82131	1.69065	1.16948	0.488057	0.769865	1.16813	1.22179	1.21265	1.05909	1.22888	0.899605	0.111759	1.49557	1.20356	2.49634	1.0942	1.22948	1.66146	1.34514	0.829149	1.11222	1.09467
-68.5	1.37642	1.79495	1.93458	1.93907	1.11056	0.545475	0.968442	0.904766	1.0529	1.09738	1.03737	1.26728	1.26413	0.124304	1.413	1.31582	2.58195	1.1269	1.34673	1.58854	1.28291	0.958128	1.47832	1.10005
-67.5	1.58358	1.72421	1.63556	2.10468	0.843117	0.68328	1.09981	0.87928	0.830099	1.16654	1.22746	1.47209	1.37449	0.137761	1.66541	1.29755	2.45804	1.26273	1.20096	1.53385	1.48396	0.895942	1.46442	1.13502
-66.5	1.65723	1.49874	1.25045	2.31515	0.897511	0.734956	1.13341	1.0237	0.866034	1.34637	1.44471	1.35049	1.7457	0.136164	1.61351	1.62389	2.34313	1.27783	0.871411	1.30208	1.45524	0.884426	1.30917	1.03012
-65.5	1.47309	1.44569	1.23233	2.48076	0.902044	0.763666	1.12119	1.01945	1.02774	1.2311	1.41755	1.40809	1.98314	0.135936	1.75033	1.67611	2.37242	1.31807	0.586222	1.13802	1.50072	0.958128	1.28832	1.01937
-64.5	1.93343	1.7419	1.15984	2.291	0.94284	0.987598	1.06315	0.951491	1.09242	1.25415	1.45014	1.33769	2.32091	0.168095	1.78336	1.57951	2.21922	1.33317	0.779517	1.00521	1.5821	0.884426	1.20259	0.823023
-63.5	1.43627	1.54737	1.23233	2.12193	1.17402	0.757924	0.876791	0.870784	0.869628	1.26337	1.20574	1.44009	1.98983	0.166042	1.95556	1.3106	2.07052	1.33065	0.782686	1.1901	1.47918	0.688654	1.19563	0.779989
-62.5	1.38563	1.35284	1.37731	1.91837	1.15135	0.545475	0.800415	0.849545	0.998994	1.30948	1.23289	1.32488	1.82262	0.174253	1.93669	1.56124	2.10882	1.40611	0.712973	1.27604	1.65151	0.702474	1.27673	0.892953
-61.5	1.23372	1.32632	1.32747	2.12538	1.26921	0.826826	0.986772	0.7476	0.966652	1.54924	1.2003	1.64491	1.78249	0.187938	2.19145	1.54296	1.93309	1.34574	0.681285	1.0599	1.46003	0.709383	1.0427	0.997848
-60.5	1.39483	1.26	1.09641	2.34965	1.26468	0.694763	1.05398	0.942995	0.934311	1.29565	1.27634	1.5937	1.68885	0.201395	1.94612	1.65522	1.73031	1.30047	0.608404	0.924479	1.24222	0.690958	1.09136	1.13502
-59.5	1.16466	1.21137	0.978615	2.08053	1.21028	0.711989	1.06926	0.798573	1.13914	0.959056	1.36324	1.10727	1.73233	0.193412	1.76212	1.58212	1.7551	1.25016	0.649598	0.958333	1.30924	0.670229	1.41113	0.968263
-58.5	0.975924	1.19369	1.0058	1.6803	1.15135	0.740698	0.812636	0.819811	1.09961	0.945223	1.09711	1.19048	1.84603	0.178815	1.96028	1.57168	1.77087	1.12187	0.576716	0.893229	1.23504	0.723202	0.940751	1.04357
-57.5	1.02656	1.13621	1.02845	1.64924	1.32814	0.453606	0.77292	0.904766	0.869628	1.18038	1.09711	1.25448	1.84937	0.180868	1.8612	1.42548	1.38786	1.28034	0.443628	0.893229	0.998085	0.783085	0.808675	1.02743
-56.5	1.08641	1.14506	0.706778	1.60439	1.35533	0.505282	0.69349	0.781582	0.700733	0.843785	0.928742	1.11367	1.5718	0.161481	1.67013	1.49858	1.29098	1.07911	0.415109	0.945312	0.988511	0.720899	0.760016	1.07047
-55.5	1.13704	0.809054	1.03751	1.47673	1.3236	0.396187	0.684325	0.649902	0.650424	0.848395	0.78753	0.979263	1.54839	0.174481	1.76684	1.74138	1.26845	0.935731	0.535522	0.966146	0.887985	0.778479	0.871238	1.04895
-54.5	1.15085	0.795791	1.07376	1.51813	1.3236	0.413413	0.846241	0.781582	0.668392	0.825341	0.809255	0.889657	1.86275	0.13069	1.89894	1.52468	1.2324	1.02629	0.507003	1	0.904739	0.82224	0.924531	1.04895
-53.5	1.00354	0.906318	1.28217	1.51813	1.21935	0.37322	0.788195	0.828307	0.513871	0.912947	0.983055	0.77445	1.67882	0.125444	1.92961	1.18267	1.44869	1.09672	0.421446	0.882812	0.837721	0.838362	1.0288	1.00054
-52.5	1.26594	0.676422	1.2278	1.28006	1.35987	0.396187	0.907341	0.5607	0.50309	0.885282	1.46643	0.556836	1.81593	0.140954	1.72674	1.16701	1.47798	1.01371	0.399265	0.765625	0.76831	0.654107	1.08673	0.831092
-51.5	1.57897	0.574738	0.516491	1.11445	1.58198	0.338769	1.02649	0.590434	0.549806	1.56308	1.23832	0.460829	1.53836	0.113584	1.46254	1.1879	1.43968	0.774745	0.418277	0.739583	0.756343	0.665623	0.841115	0.812265
-50.5	1.72168	0.610107	0.57539	1.06269	1.44146	0.327285	1.1273	0.705123	0.57496	1.17115	0.716924	0.499232	1.69554	0.111987	1.07096	1.18267	1.36082	0.827569	0.43729	0.664062	0.715653	0.619559	0.845749	0.868747
-49.5	1.51913	0.557054	0.539145	1.34562	1.54571	0.321543	1.15785	0.773086	0.560586	0.940612	0.586574	0.755248	1.9497	0.112672	1.05444	1.22184	1.45094	1.00365	0.415109	0.627604	0.797032	0.612649	0.771601	0.863367
-48.5	1.52373	0.557054	0.5029	1.55263	1.59104	0.390446	0.983717	0.845298	0.57496	0.557912	0.52683	0.723246	1.54839	0.113584	1.21485	1.02081	1.12651	1.04641	0.408771	0.614583	0.751556	0.580404	0.618671	0.696611
-47.5	1.43627	0.512843	0.557267	1.64924	1.53665	0.344511	0.818746	0.645655	0.700733	0.447252	0.515968	0.915259	1.88616	0.111075	1.19834	1.07563	0.871916	1.08666	0.383421	0.6875	0.806606	0.430697	0.630257	0.723507
-46.5	0.92989	0.225474	0.688655	1.40772	1.31	0.338769	0.873736	0.666893	0.654018	0.48875	0.445362	0.588838	1.47147	0.101724	1.06388	1.23489	0.630844	0.973462	0.339058	0.736979	0.576831	0.511309	0.472693	0.658956
-45.5	0.860839	0.216632	0.806452	1.29041	1.60917	0.252641	0.953167	0.526718	0.600115	0.451863	0.553987	0.62084	1.36111	0.0996711	0.993112	1.18267	0.660133	0.887939	0.259839	0.679688	0.495452	0.557373	0.537572	0.610543
-44.5	0.980528	0.238737	0.611635	1.04889	1.28734	0.137804	0.546849	0.31858	0.499497	0.521025	0.592005	0.844854	1.32098	0.111075	1.0285	1.27927	0.504675	0.986039	0.218645	0.658854	0.423648	0.644894	0.572329	0.591716
-43.5	0.883856	0.260843	0.634288	1.00059	1.10602	0.109095	0.519354	0.271855	0.495903	0.419587	0.358462	0.211214	0.923015	0.113128	1.00019	1.20878	0.42582	1.1269	0.243995	0.630208	0.414074	0.60574	0.567695	0.607854
-42.5	0.644478	0.287369	0.598043	0.955733	1.09243	0.0861277	0.516299	0.352561	0.442001	0.54408	0.238975	0.224014	1.01331	0.0967061	0.769013	1.261	0.477639	0.812476	0.190126	0.65625	0.449976	0.532037	0.519035	0.667025
-41.5	0.543203	0.393475	0.534614	0.603802	0.752459	0.074644	0.537684	0.348314	0.449188	0.484139	0.244406	0.211214	0.725704	0.082337	0.625118	1.08608	0.405542	0.905546	0.237658	0.5625	0.406893	0.575798	0.553792	0.669715
-40.5	0.492565	0.349264	0.602573	0.403685	0.670867	0.0861277	0.494913	0.441764	0.445594	0.627075	0.13035	0.281618	0.789245	0.0770912	0.405737	1.29233	0.374	0.83763	0.269345	0.570312	0.382958	0.511309	0.405496	0.591716
-39.5	0.58003	0.296211	0.588982	0.400235	0.621005	0.0861277	0.525464	0.33557	0.362944	0.673183	0.0977623	0.300819	0.779212	0.0668275	0.476505	1.26883	0.376253	0.787322	0.351733	0.455729	0.375778	0.522825	0.412448	0.441097
-38.5	0.515583	0.269685	0.557267	0.307077	0.666334	0.074644	0.381878	0.33557	0.327009	0.65474	0.135781	0.249616	0.725704	0.0563358	0.415173	1.15135	0.387518	0.724437	0.332721	0.471354	0.36381	0.465245	0.333665	0.336202
-37.5	0.441928	0.234316	0.561798	0.34503	0.584742	0.0976114	0.274952	0.271855	0.341383	0.419587	0.0977623	0.224014	0.749114	0.0570201	0.393942	1.15657	0.378506	0.608728	0.294695	0.489583	0.349449	0.458335	0.32208	0.301237
-36.5	0.464945	0.344843	0.330736	0.338129	0.602874	0.074644	0.342162	0.352561	0.370131	0.48875	0.0977623	0.30722	0.481573	0.0529146	0.417532	0.749289	0.430326	0.52572	0.228151	0.575521	0.311154	0.564282	0.303543	0.333513
-35.5	0.487962	0.247579	0.330736	0.434738	0.589275	0.0689022	0.354382	0.365305	0.344976	0.336592	0.0706061	0.288018	0.31436	0.0465284	0.35384	0.571757	0.364988	0.46535	0.196464	0.528646	0.335089	0.578101	0.303543	0.430339
-34.5	0.441928	0.216632	0.303552	0.503744	0.621005	0.0689022	0.256622	0.42902	0.273106	0.424198	0.0597436	0.217614	0.327737	0.0522304	0.323174	0.569146	0.256844	0.500566	0.171114	0.380208	0.287219	0.525128	0.240981	0.387305
-33.5	0.336049	0.243158	0.258246	0.369182	0.389828	0.0861277	0.357437	0.450259	0.240765	0.43803	0.0814686	0.230415	0.304327	0.0506338	0.294867	0.519542	0.227554	0.455289	0.199632	0.273438	0.25371	0.419181	0.162198	0.311996
-32.5	0.372877	0.243158	0.231062	0.182866	0.394361	0.0918695	0.391043	0.611673	0.258732	0.576356	0.0543124	0.249616	0.431409	0.0565639	0.28779	0.407279	0.23206	0.435165	0.0792192	0.286458	0.184299	0.389239	0.155247	0.233997
-31.5	0.423514	0.234316	0.353389	0.207018	0.394361	0.0459348	0.329942	0.65415	0.183269	0.539469	0.0488812	0.352023	0.458163	0.0693364	0.250047	0.37595	0.272615	0.430135	0.082388	0.231771	0.258497	0.352388	0.18537	0.295858
-30.5	0.39129	0.229895	0.308083	0.200117	0.349032	0.074644	0.296337	0.61592	0.233578	0.613242	0.0651749	0.166411	0.568524	0.0725295	0.271278	0.352453	0.270362	0.425104	0.0633754	0.231771	0.220201	0.280989	0.190004	0.255514
-29.5	0.382084	0.20779	0.231062	0.200117	0.317302	0.0689022	0.244402	0.7476	0.222797	0.590188	0.119487	0.211214	0.622032	0.073898	0.226458	0.315902	0.292892	0.39995	0.0728817	0.221354	0.186692	0.285596	0.247932	0.236686
-28.5	0.557013	0.119369	0.249184	0.12076	0.29917	0.0631603	0.250512	0.509727	0.258732	0.659351	0.0488812	0.179211	0.491606	0.0586166	0.20051	0.292405	0.254591	0.404981	0.0792192	0.210938	0.229775	0.317841	0.261835	0.196342
-27.5	0.708926	0.0972634	0.226531	0.248421	0.258375	0.0803859	0.314667	0.424773	0.183269	0.613242	0.0380187	0.172811	0.418032	0.0583886	0.235894	0.232358	0.166723	0.379826	0.0602066	0.21875	0.215414	0.306325	0.259518	0.204411
-26.5	0.810201	0.106105	0.190286	0.34848	0.199447	0.074644	0.326887	0.437516	0.168895	0.723903	0.021725	0.256016	0.351147	0.059529	0.193433	0.161867	0.110398	0.382342	0.101401	0.208333	0.193873	0.285596	0.176101	0.204411
-25.5	0.37748	0.0928423	0.163103	0.293275	0.163184	0.0516766	0.323832	0.416277	0.140147	0.700848	0.021725	0.236815	0.31436	0.0520023	0.20051	0.156646	0.150952	0.394919	0.15527	0.348958	0.126855	0.241835	0.162198	0.215169
-24.5	0.372877	0.101684	0.172164	0.238071	0.167717	0.0574185	0.351327	0.488489	0.161708	0.59941	0.0162937	0.192012	0.257508	0.0529146	0.17692	0.1697	0.132928	0.392403	0.301033	0.223958	0.136429	0.218803	0.171467	0.201721
-23.5	0.34986	0.0530527	0.158572	0.258772	0.135987	0.0516766	0.360492	0.395039	0.111399	0.622464	0.0325874	0.16001	0.187278	0.0524585	0.261842	0.174921	0.132928	0.362219	0.28202	0.21875	0.136429	0.257958	0.13671	0.172136
-22.5	0.313032	0.0795791	0.172164	0.193217	0.122388	0.0344511	0.446033	0.416277	0.0970246	0.594799	0.00543124	0.172811	0.18059	0.0474407	0.205227	0.185364	0.0901205	0.347126	0.20597	0.184896	0.114888	0.214197	0.157564	0.190963
-21.5	0.266998	0.0795791	0.14498	0.134562	0.135987	0.0459348	0.372713	0.463002	0.0970246	0.627075	0.00543124	0.15361	0.173901	0.0515462	0.271278	0.318513	0.0946266	0.387373	0.202801	0.190104	0.112494	0.26717	0.190004	0.21248
-20.5	0.354463	0.0884212	0.149511	0.12076	0.226644	0.0287092	0.391043	0.463002	0.0754636	0.59941	0.00543124	0.179211	0.110361	0.0451599	0.212304	0.310681	0.114904	0.344611	0.161607	0.200521	0.105314	0.248745	0.111222	0.153308
-19.5	0.322239	0.0663159	0.28543	0.12076	0.276506	0.0344511	0.409373	0.46725	0.0718701	0.414976	0.0162937	0.128008	0.163869	0.0490373	0.188715	0.297627	0.0585783	0.455289	0.110907	0.174479	0.138822	0.228016	0.162198	0.199032
-18.5	0.382084	0.132632	0.267307	0.103509	0.281039	0.0344511	0.494913	0.760343	0.100618	0.456474	0.0108625	0.166411	0.177246	0.0506338	0.160408	0.328956	0.0698434	0.520689	0.110907	0.171875	0.110101	0.278686	0.164516	0.242066
-17.5	0.326843	0.0663159	0.163103	0.11731	0.326368	0.00574185	0.632389	0.488489	0.111399	0.350424	0.021725	0.0896057	0.0836064	0.0492654	0.202868	0.532595	0.0675904	0.467866	0.0982318	0.169271	0.0861656	0.255654	0.132076	0.215169
-16.5	0.266998	0.0618949	0.194817	0.0862575	0.403427	0.0344511	0.479638	0.450259	0.118586	0.290483	0.0162937	0.147209	0.103672	0.0572482	0.191074	0.441219	0.0675904	0.43265	0.0855568	0.210938	0.0813786	0.301718	0.101953	0.180204
-15.5	0.382084	0.0486317	0.199348	0.0931581	0.453289	0.0114837	0.446033	0.437516	0.147334	0.253596	0.0162937	0.121608	0.0936392	0.0465284	0.28779	0.297627	0.0540723	0.415042	0.0697129	0.140625	0.0837721	0.306325	0.118173	0.20979
-14.5	0.299222	0.0442106	0.262776	0.0862575	0.453289	0.0229674	0.366603	0.378048	0.140147	0.285872	0.0162937	0.102407	0.0936392	0.045388	0.22174	0.20625	0.0946266	0.357188	0.0697129	0.151042	0.126855	0.306325	0.0695136	0.196342
-13.5	0.382084	0.0618949	0.203878	0.11731	0.525815	0.0401929	0.369658	0.314332	0.0970246	0.207488	0.0108625	0.128008	0.110361	0.045388	0.202868	0.185364	0.0856145	0.374796	0.0665441	0.0703125	0.134035	0.27408	0.0810992	0.220549
-12.5	0.36367	0.0840002	0.312613	0.0552048	0.285572	0.074644	0.284117	0.31858	0.104212	0.318148	0.0325874	0.0832053	0.0936392	0.0435633	0.165125	0.127927	0.0675904	0.316941	0.0665441	0.0651042	0.114888	0.297112	0.0973191	0.204411
-11.5	0.400497	0.0530527	0.348858	0.106959	0.37623	0.0459348	0.311612	0.293093	0.0682766	0.235153	0.0162937	0.0576037	0.090295	0.0403702	0.0967164	0.0965982	0.0901205	0.309395	0.082388	0.0833333	0.100527	0.27408	0.0973191	0.188273
-10.5	0.220964	0.0928423	0.28996	0.0931581	0.308236	0.0574185	0.299392	0.339818	0.0754636	0.281262	0.108625	0.0704045	0.0936392	0.0424229	0.115588	0.109652	0.0833615	0.324487	0.0728817	0.0651042	0.10292	0.285596	0.0973191	0.204411
-9.5	0.211757	0.106105	0.154041	0.069006	0.480486	0.0918695	0.329942	0.250616	0.100618	0.405754	0.184662	0.0512033	0.0635409	0.0410545	0.0754859	0.0600475	0.0811085	0.314426	0.0570378	0.0755208	0.131642	0.292505	0.101953	0.220549
-8.5	0.124292	0.163579	0.163103	0.0724563	0.553012	0.074644	0.271897	0.314332	0.0754636	0.521025	0.135781	0.0960061	0.0668852	0.0451599	0.0849217	0.0992089	0.0766025	0.296818	0.0697129	0.0546875	0.184299	0.271777	0.0973191	0.193653
-7.5	0.0828615	0.159158	0.190286	0.0862575	0.516749	0.0918695	0.305502	0.293093	0.0826506	0.59941	0.0760374	0.0640041	0.13377	0.0380894	0.0802038	0.0783228	0.0878675	0.319457	0.0570378	0.0416667	0.153183	0.253351	0.108905	0.207101
-6.5	0.101275	0.141474	0.176694	0.0931581	0.530348	0.0631603	0.317722	0.229377	0.0718701	0.567134	0.0706061	0.115207	0.163869	0.0342121	0.0660502	0.0496045	0.105892	0.316941	0.0982318	0.0416667	0.143609	0.315537	0.10427	0.20979
-5.5	0.0920683	0.172421	0.14498	0.100059	0.516749	0.0401929	0.293282	0.305836	0.0826506	0.576356	0.0868998	0.0640041	0.137115	0.0342121	0.0825627	0.0574368	0.148699	0.324487	0.0602066	0.09375	0.134035	0.366208	0.0718308	0.169446
-4.5	0.055241	0.20779	0.181225	0.069006	0.47142	0.0459348	0.363547	0.237873	0.0898376	0.27204	0.0814686	0.0448029	0.130426	0.0362648	0.0589734	0.054826	0.139687	0.294303	0.0982318	0.0885417	0.177118	0.345479	0.0926848	0.166756
-3.5	0.0506376	0.278527	0.212939	0.0034503	0.453289	0.0401929	0.366603	0.344066	0.111399	0.207488	0.0760374	0.0512033	0.120393	0.0394579	0.073127	0.0574368	0.132928	0.319457	0.101401	0.0572917	0.244136	0.299415	0.057928	0.158687
-2.5	0.0690512	0.176842	0.194817	0.0172515	0.553012	0.0287092	0.284117	0.33557	0.0646831	0.290483	0.0162937	0.0896057	0.100328	0.0294224	0.0471787	0.0678798	0.153205	0.271664	0.107738	0.0572917	0.208234	0.446819	0.111222	0.0833782
-1.5	0.055241	0.132632	0.185756	0.0034503	0.566611	0.0287092	0.223017	0.310084	0.0682766	0.202877	0.0325874	0.0576037	0.100328	0.0244046	0.073127	0.0626583	0.175735	0.266633	0.0665441	0.046875	0.213021	0.350085	0.10427	0.0968263
-0.5	0.0598444	0.0840002	0.203878	0.0103509	0.602874	0.0344511	0.143586	0.322827	0.0970246	0.318148	0.0108625	0.0768049	0.0735737	0.0250888	0.0495376	0.065269	0.137434	0.332034	0.110907	0.0442708	0.191479	0.271777	0.115856	0.174825
0.5	0.0736547	0.106105	0.149511	0.0103509	0.480486	0.0459348	0.164971	0.407782	0.125773	0.21671	0.0108625	0.0896057	0.107016	0.025545	0.0566145	0.0574368	0.128422	0.367249	0.117244	0.0546875	0.186692	0.2165	0.15293	0.145239
1.5	0.0644478	0.0972634	0.240123	0.0207018	0.430624	0.0229674	0.149696	0.535214	0.168895	0.308927	0.0434499	0.0576037	0.0702294	0.0237204	0.0802038	0.0861551	0.153205	0.223871	0.107738	0.0755208	0.162757	0.225713	0.143662	0.172136
2.5	0.115085	0.119369	0.28996	0.0138012	0.453289	0.0401929	0.177191	0.403534	0.172488	0.253596	0.021725	0.0512033	0.0802622	0.02258	0.0636913	0.107041	0.144193	0.228902	0.158438	0.143229	0.169938	0.20959	0.132076	0.188273
3.5	0.124292	0.159158	0.308083	0.0069006	0.367164	0.0516766	0.164971	0.454507	0.176082	0.225931	0.0434499	0.0640041	0.0802622	0.0193868	0.035384	0.154035	0.0946266	0.198717	0.158438	0.109375	0.15079	0.221106	0.148296	0.14255
4.5	0.253188	0.159158	0.271838	0.0034503	0.344499	0.0229674	0.192466	0.556452	0.197643	0.21671	0.0380187	0.0576037	0.0936392	0.0177903	0.035384	0.114874	0.0901205	0.176078	0.142595	0.0963542	0.162757	0.207287	0.118173	0.169446
5.5	0.271602	0.194527	0.244654	0.0103509	0.475953	0.0516766	0.174136	0.573443	0.165301	0.308927	0.0868998	0.0640041	0.0836064	0.0207553	0.0566145	0.114874	0.126169	0.143378	0.158438	0.0989583	0.160364	0.2165	0.155247	0.153308
6.5	0.151913	0.176842	0.185756	0.0138012	0.453289	0.0516766	0.223017	0.52247	0.194049	0.27204	0.0325874	0.0384025	0.137115	0.0232642	0.0589734	0.13576	0.0788555	0.118224	0.186957	0.0755208	0.131642	0.221106	0.148296	0.134481
7.5	0.110482	0.198948	0.14498	0.0172515	0.339966	0.0516766	0.226072	0.293093	0.14374	0.244375	0.0108625	0.0576037	0.100328	0.0168779	0.0424608	0.148813	0.0946266	0.135832	0.12992	0.0859375	0.136429	0.191165	0.162198	0.153308
8.5	0.115085	0.282948	0.135919	0.0138012	0.294638	0.0401929	0.168026	0.250616	0.158114	0.313537	0	0.0576037	0.0936392	0.0155095	0.0518966	0.148813	0.0856145	0.123255	0.18062	0.0729167	0.119674	0.142798	0.139027	0.137171
9.5	0.115085	0.243158	0.0679594	0.034503	0.339966	0.0229674	0.244402	0.263359	0.111399	0.290483	0.00543124	0.0768049	0.090295	0.0118602	0.037743	0.148813	0.0698434	0.15344	0.237658	0.0885417	0.129248	0.191165	0.18537	0.0968263
10.5	0.0966717	0.362527	0.113266	0.0379533	0.308236	0.0574185	0.278007	0.271855	0.197643	0.235153	0.00543124	0.0576037	0.103672	0.0152814	0.0566145	0.174921	0.0675904	0.203748	0.202801	0.130208	0.107707	0.172739	0.183053	0.102205
11.5	0.119689	0.287369	0.135919	0.0414036	0.371697	0.0287092	0.387988	0.3738	0.20483	0.156769	0	0.0448029	0.130426	0.0134567	0.0471787	0.151424	0.0743494	0.183625	0.167945	0.0260417	0.136429	0.140495	0.141344	0.126412
12.5	0.0828615	0.229895	0.113266	0.0207018	0.380762	0.0516766	0.430758	0.297341	0.140147	0.16138	0.0108625	0.0704045	0.0936392	0.014141	0.0495376	0.190586	0.0811085	0.166017	0.18062	0.0494792	0.0765917	0.147404	0.143662	0.112964
13.5	0.0966717	0.29179	0.131388	0.0207018	0.367164	0.0803859	0.421593	0.31858	0.247952	0.101439	0	0.0832053	0.127082	0.0134567	0.037743	0.203639	0.0856145	0.158471	0.212307	0.0364583	0.122068	0.16583	0.115856	0.107585
14.5	0.0598444	0.185685	0.0815513	0.0241521	0.37623	0.0516766	0.421593	0.365305	0.158114	0.129104	0.00543124	0.0704045	0.113705	0.0116321	0.0424608	0.148813	0.0811085	0.173563	0.161607	0.0364583	0.117281	0.172739	0.141344	0.121033
15.5	0.0598444	0.150316	0.140449	0.0276024	0.394361	0.0918695	0.494913	0.297341	0.161708	0.087606	0.0162937	0.0576037	0.130426	0.0136848	0.0471787	0.143592	0.0675904	0.188656	0.218645	0.0364583	0.131642	0.154314	0.101953	0.0806885
16.5	0.0966717	0.194527	0.0543675	0.0276024	0.412493	0.0689022	0.525464	0.28035	0.161708	0.115271	0.00543124	0.0832053	0.167213	0.00980745	0.0566145	0.127927	0.0720964	0.238964	0.237658	0.0416667	0.134035	0.15892	0.143662	0.091447
17.5	0.0322239	0.163579	0.122327	0.034503	0.40796	0.074644	0.507133	0.237873	0.20483	0.059941	0	0.0832053	0.13377	0.0107198	0.0424608	0.0992089	0.0563253	0.193686	0.148932	0.046875	0.129248	0.156617	0.143662	0.0995159
18.5	0.147309	0.229895	0.113266	0.0276024	0.494085	0.074644	0.635444	0.229377	0.14374	0.0783844	0.021725	0.0512033	0.130426	0.00957937	0.0518966	0.107041	0.0630844	0.166017	0.139426	0.0729167	0.126855	0.175043	0.113539	0.110274
19.5	0.230171	0.252001	0.0679594	0.0241521	0.412493	0.114837	0.739315	0.229377	0.122179	0.106049	0.0108625	0.0768049	0.147147	0.0116321	0.0636913	0.187975	0.0946266	0.181109	0.161607	0.0807292	0.148396	0.191165	0.118173	0.155998
20.5	0.115085	0.336001	0.0996738	0.0379533	0.417026	0.143546	0.586564	0.259111	0.125773	0.0783844	0.0108625	0.0640041	0.183934	0.0118602	0.0401019	0.10443	0.112651	0.193686	0.139426	0.0625	0.136429	0.161223	0.143662	0.0995159
21.5	0.0644478	0.327159	0.117796	0.0379533	0.353565	0.15503	0.562124	0.263359	0.125773	0.059941	0.0162937	0.115207	0.117049	0.0130006	0.0636913	0.10182	0.0720964	0.264118	0.139426	0.078125	0.146003	0.211894	0.157564	0.172136
22.5	0.0644478	0.198948	0.135919	0.0138012	0.29917	0.28135	0.629334	0.212386	0.100618	0.115271	0.00543124	0.15361	0.153836	0.011404	0.0660502	0.0939874	0.0698434	0.226387	0.110907	0.0833333	0.162757	0.147404	0.176101	0.250134
23.5	0.0966717	0.114948	0.131388	0.0241521	0.253842	0.258383	0.473528	0.22513	0.14374	0.142936	0.0325874	0.166411	0.127082	0.0145971	0.073127	0.0757121	0.0540723	0.314426	0.15527	0.078125	0.177118	0.170436	0.129759	0.134481
24.5	0.0644478	0.194527	0.140449	0.034503	0.294638	0.160772	0.391043	0.271855	0.118586	0.0829952	0.0162937	0.15361	0.147147	0.0168779	0.0401019	0.0861551	0.0337952	0.276695	0.101401	0.0755208	0.224988	0.168133	0.162198	0.134481
25.5	0.0506376	0.274106	0.208409	0.0207018	0.222111	0.241158	0.412428	0.22513	0.129366	0.16138	0.00543124	0.128008	0.217377	0.0143691	0.0613323	0.0835444	0.0495663	0.243994	0.174282	0.078125	0.263284	0.225713	0.20159	0.131791
26.5	0.0598444	0.203369	0.199348	0.0138012	0.271973	0.143546	0.449088	0.271855	0.122179	0.087606	0.0162937	0.185612	0.150492	0.0168779	0.0424608	0.10443	0.0518193	0.208779	0.193295	0.0703125	0.184299	0.237229	0.199272	0.145239
27.5	0.0598444	0.132632	0.226531	0.0069006	0.190381	0.172255	0.449088	0.254864	0.154521	0.152158	0.00543124	0.166411	0.153836	0.0155095	0.0589734	0.10182	0.0405542	0.226387	0.18062	0.0807292	0.236955	0.221106	0.227078	0.145239
28.5	0.0828615	0.128211	0.299021	0.0172515	0.194914	0.160772	0.470473	0.259111	0.190456	0.0922169	0.00543124	0.230415	0.163869	0.0168779	0.0660502	0.127927	0.0563253	0.216325	0.313708	0.0677083	0.287219	0.255654	0.240981	0.180204
29.5	0.0920683	0.145895	0.398695	0.0276024	0.194914	0.120579	0.549904	0.267607	0.176082	0.119882	0.0108625	0.31362	0.214033	0.017106	0.0707681	0.0913767	0.0518193	0.188656	0.326383	0.0755208	0.378171	0.186559	0.243298	0.166756
30.5	0.0506376	0.154737	0.312613	0.0138012	0.213046	0.149288	0.592674	0.31858	0.183269	0.119882	0.0380187	0.30722	0.277573	0.0177903	0.0636913	0.112263	0.0675904	0.183625	0.468978	0.109375	0.406893	0.181952	0.224761	0.190963
31.5	0.142706	0.181264	0.271838	0.0414036	0.244776	0.074644	0.629334	0.382295	0.165301	0.142936	0.0108625	0.256016	0.237442	0.0152814	0.0542555	0.187975	0.0315422	0.168532	0.500665	0.117188	0.303973	0.237229	0.206224	0.268962
32.5	0.151913	0.168	0.258246	0.0207018	0.167717	0.120579	0.488803	0.441764	0.140147	0.0968277	0.0325874	0.281618	0.240787	0.0159656	0.073127	0.193196	0.0292892	0.18614	0.427784	0.244792	0.294399	0.211894	0.213175	0.28241
33.5	0.179533	0.0795791	0.525553	0.0310527	0.163184	0.189481	0.501023	0.216634	0.179675	0.124493	0	0.236815	0.311016	0.0173341	0.0518966	0.190586	0.0292892	0.203748	0.440459	0.122396	0.359023	0.191165	0.259518	0.303927
34.5	0.193343	0.0663159	0.457593	0.0379533	0.199447	0.160772	0.427703	0.165661	0.190456	0.129104	0.0597436	0.147209	0.234098	0.0177903	0.0778449	0.130538	0.0270362	0.236448	0.364408	0.117188	0.435615	0.251048	0.210858	0.220549
35.5	0.147309	0.0972634	0.330736	0.0448539	0.208513	0.114837	0.461308	0.288845	0.20483	0.147547	0.0271562	0.211214	0.214033	0.0159656	0.0684091	0.120095	0.0270362	0.243994	0.383421	0.127604	0.382958	0.239532	0.208541	0.28241
36.5	0.115085	0.110527	0.317144	0.0310527	0.226644	0.120579	0.384933	0.293093	0.165301	0.147547	0.0380187	0.147209	0.327737	0.0173341	0.073127	0.156646	0.0112651	0.216325	0.443628	0.127604	0.382958	0.257958	0.196955	0.27972
37.5	0.170326	0.106105	0.303552	0.069006	0.167717	0.120579	0.556014	0.310084	0.14374	0.156769	0.0488812	0.121608	0.351147	0.0157375	0.0684091	0.122706	0.0315422	0.221356	0.396096	0.119792	0.430828	0.359298	0.247932	0.317375
38.5	0.147309	0.0840002	0.326205	0.0655557	0.154118	0.235416	0.473528	0.322827	0.208423	0.179823	0.0543124	0.121608	0.33777	0.0120883	0.0495376	0.0757121	0.0383012	0.216325	0.421446	0.104167	0.299186	0.333963	0.236346	0.379236
39.5	0.156516	0.0663159	0.326205	0.0759066	0.104256	0.229674	0.494913	0.305836	0.377318	0.179823	0.0651749	0.224014	0.190623	0.0182464	0.0542555	0.0992089	0.0518193	0.264118	0.519678	0.078125	0.392532	0.292505	0.203907	0.403443
40.5	0.179533	0.114948	0.326205	0.141462	0.0906577	0.447864	0.519354	0.31858	0.488716	0.207488	0.152075	0.243216	0.193967	0.0189307	0.0636913	0.133149	0.0428073	0.296818	0.465809	0.164062	0.471517	0.363904	0.206224	0.484131
41.5	0.179533	0.216632	0.385103	0.175965	0.126921	0.539734	0.577399	0.271855	0.395285	0.308927	0.21725	0.172811	0.177246	0.0230361	0.0613323	0.0965982	0.0428073	0.357188	0.468978	0.234375	0.552896	0.356995	0.234029	0.545992
42.5	0.142706	0.198948	0.317144	0.22772	0.0770591	0.304318	0.858461	0.395039	0.398879	0.364257	0.184662	0.47363	0.150492	0.0216676	0.101434	0.0861551	0.14194	0.382342	0.48799	0.184896	0.667784	0.315537	0.217809	0.470683
43.5	0.17493	0.190106	0.330736	0.138012	0.113322	0.338769	0.604894	0.344066	0.434814	0.401143	0.146643	0.384025	0.140459	0.0275977	0.0967164	0.0704906	0.182494	0.394919	0.570378	0.195312	0.65821	0.377724	0.187687	0.403443
44.5	0.197947	0.384632	0.258246	0.179416	0.135987	0.327285	0.513244	0.305836	0.309041	0.345813	0.162937	0.249616	0.107016	0.0294224	0.158049	0.107041	0.123916	0.389888	0.633754	0.208333	0.481091	0.38233	0.238663	0.449166
45.5	0.230171	0.49958	0.339797	0.238071	0.181315	0.401929	0.592674	0.314332	0.294667	0.267429	0.287856	0.256016	0.100328	0.031247	0.15569	0.0887659	0.110398	0.364734	0.529184	0.260417	0.464337	0.476761	0.215492	0.360409
46.5	0.262395	0.287369	0.36245	0.238071	0.190381	0.74644	0.494913	0.250616	0.35935	0.295094	0.298718	0.47363	0.0869507	0.0241765	0.202868	0.159256	0.105892	0.30688	0.564041	0.268229	0.61752	0.536644	0.229395	0.368478
47.5	0.220964	0.296211	0.389634	0.241521	0.244776	0.643087	0.504078	0.31858	0.424033	0.308927	0.315012	0.352023	0.0668852	0.0223519	0.285431	0.4125	0.0991326	0.364734	0.706635	0.304688	0.76113	0.617256	0.224761	0.403443
48.5	0.207154	0.252001	0.276368	0.23117	0.462354	0.953147	0.507133	0.475745	0.449188	0.451863	0.287856	0.512033	0.0668852	0.0232642	0.231176	0.339399	0.0901205	0.392403	0.731986	0.255208	0.581618	0.612649	0.217809	0.408822
49.5	0.257791	0.349264	0.339797	0.148363	0.344499	0.872761	0.568234	0.501232	0.488716	0.645518	0.249837	0.47363	0.0769179	0.0216676	0.117947	0.347231	0.101386	0.387373	0.69396	0.276042	0.603159	0.506702	0.271103	0.449166
50.5	0.243981	0.336001	0.253715	0.22772	0.312769	0.947405	0.598784	0.52247	0.603708	0.548691	0.287856	0.377624	0.113705	0.0207553	0.127383	0.454273	0.0720964	0.407496	0.697129	0.351562	0.607946	0.520521	0.308177	0.56213
51.5	0.243981	0.318316	0.199348	0.213919	0.199447	1.10818	0.501023	0.543709	0.639644	0.613242	0.228112	0.326421	0.143803	0.0173341	0.148613	0.360285	0.191506	0.394919	0.624247	0.348958	0.646242	0.561979	0.310494	0.516407
52.5	0.308429	0.340422	0.425879	0.200117	0.199447	0.912954	0.424648	0.518223	0.614489	0.696238	0.293287	0.403226	0.143803	0.0189307	0.148613	0.261076	0.245578	0.417558	0.630585	0.338542	0.627094	0.601133	0.319763	0.586337
53.5	0.382084	0.362527	0.670533	0.244971	0.181315	0.970372	0.473528	0.645655	0.664798	0.590188	0.461655	0.428827	0.167213	0.0193868	0.160408	0.287184	0.220795	0.359703	0.703467	0.335938	0.550503	0.82224	0.324397	0.570199
54.5	0.36367	0.406738	0.656941	0.22772	0.140519	1.00482	0.522409	0.696627	0.596521	0.553301	0.249837	0.428827	0.167213	0.0166499	0.150972	0.295016	0.216289	0.334549	0.608404	0.325521	0.471517	0.626468	0.419399	0.502959
55.5	0.487962	0.477475	0.593512	0.238071	0.126921	1.09095	0.559069	0.853793	0.510277	0.590188	0.238975	0.614439	0.220721	0.0164218	0.198151	0.433386	0.184747	0.460319	0.627416	0.361979	0.500239	0.511309	0.560743	0.570199
56.5	0.193343	0.274106	0.453063	0.22772	0.145052	1.6192	0.595729	0.743352	0.49231	0.451863	0.347599	0.678443	0.294295	0.0152814	0.233535	0.355064	0.243325	0.397434	0.61791	0.442708	0.447583	0.585011	0.546841	0.589026
57.5	0.142706	0.252001	0.376042	0.279474	0.154118	1.53881	0.656829	1.10016	0.553399	0.54408	0.358462	0.678443	0.38459	0.0189307	0.146254	0.509099	0.236566	0.271664	0.624247	0.411458	0.485878	0.538947	0.546841	0.661646
58.5	0.20255	0.340422	0.353389	0.241521	0.190381	1.67662	0.617114	0.828307	0.524651	0.359646	0.477949	0.524834	0.401311	0.0234923	0.148613	0.399447	0.286133	0.301849	0.573547	0.416667	0.36381	0.458335	0.447204	0.734266
59.5	0.207154	0.433264	0.348858	0.300176	0.135987	1.34359	0.519354	0.794325	0.553399	0.345813	0.847274	0.524834	0.357836	0.0237204	0.122665	0.415111	0.268109	0.21884	0.681285	0.497396	0.370991	0.453729	0.61172	0.782679
60.5	0.225567	0.534948	0.312613	0.300176	0.194914	1.46991	0.531574	0.921757	0.521058	0.3827	0.83098	0.608039	0.367868	0.0264573	0.1321	0.402057	0.333446	0.256572	0.649598	0.505208	0.370991	0.400755	0.806358	0.933297
61.5	0.193343	0.437685	0.303552	0.46579	0.226644	1.37804	0.485748	0.917509	0.542619	0.391922	0.945036	0.512033	0.404655	0.0328436	0.117947	0.472548	0.44835	0.296818	1.06788	0.575521	0.438009	0.446819	1.02417	0.874126
62.5	0.184137	0.464212	0.235593	0.590001	0.17225	1.65939	0.537684	0.824059	0.524651	0.341203	0.814686	0.77445	0.357836	0.0303347	0.117947	0.61614	0.520446	0.309395	0.909437	0.567708	0.430828	0.389239	0.912946	0.736955
63.5	0.290015	0.402317	0.380573	0.57275	0.213046	1.86036	0.504078	0.69238	0.600115	0.336592	0.972192	0.78085	0.327737	0.0332997	0.148613	0.670966	0.551988	0.296818	1.0045	0.625	0.478698	0.414575	0.905994	0.712749
64.5	0.322239	0.428843	0.389634	0.479591	0.213046	1.67088	0.446033	0.705123	1.00259	0.290483	0.934173	0.768049	0.351147	0.0269135	0.169843	0.595254	0.502422	0.271664	0.855568	0.710938	0.485878	0.624165	0.894409	0.623991
65.5	0.317636	0.481896	0.493838	0.476141	0.249309	1.63643	0.497968	0.734857	0.977433	0.290483	0.966761	0.640041	0.391278	0.0296504	0.214663	0.543038	0.558747	0.304364	0.716142	0.565104	0.5146	0.98116	0.922214	0.755783
66.5	0.299222	0.49958	0.693186	0.527896	0.281039	1.98094	0.519354	0.683884	0.970246	0.308927	1.78145	0.62084	0.317705	0.0323874	0.337328	0.488212	0.615073	0.462835	0.880918	0.528646	0.509813	0.87291	0.9338	0.833782
67.5	0.37748	0.561475	0.643349	0.489942	0.290105	2.15319	0.559069	0.781582	1.11399	0.235153	2.10189	0.691244	0.377901	0.0337559	0.344405	0.451662	0.554241	0.495535	0.947462	0.447917	0.447583	0.870607	1.06356	0.806885
68.5	0.418911	0.517264	0.561798	0.545147	0.308236	1.88333	0.497968	0.917509	1.03852	0.262818	1.38497	0.844854	0.304327	0.0376333	0.318456	0.516931	0.574518	0.550874	0.852399	0.429688	0.418861	0.658713	1.02648	0.645508
69.5	0.317636	0.58358	0.684125	0.603802	0.303703	1.28043	0.482693	1.00246	0.808538	0.341203	1.28177	0.761649	0.327737	0.0342121	0.379789	0.522152	0.585783	0.387373	0.79853	0.523438	0.471517	0.644894	0.762333	0.782679
70.5	0.280808	0.543791	0.679594	0.755615	0.321835	1.3034	0.522409	0.858041	0.837286	0.290483	1.26548	0.857655	0.264196	0.0342121	0.422249	0.44644	0.466374	0.30688	0.855568	0.658854	0.402106	0.679442	0.792455	0.857988
71.5	0.248584	0.548212	0.643349	0.686609	0.358098	1.01056	0.644609	0.620168	0.894782	0.336592	1.64567	0.78725	0.300983	0.0485811	0.386865	0.37856	0.466374	0.344611	0.763673	0.653646	0.670177	0.725506	0.783187	0.823023
72.5	0.280808	0.618949	0.711308	0.593451	0.485019	0.867019	0.562124	0.573443	0.991807	0.308927	1.43928	0.601639	0.324393	0.0444757	0.28779	0.441219	0.581277	0.344611	0.833386	0.796875	0.758736	0.594224	0.783187	0.763852
73.5	0.317636	0.884212	0.738492	0.679709	0.47142	0.763666	0.556014	0.479993	0.887595	0.322759	1.41755	0.742448	0.29095	0.0314751	0.330251	0.389003	0.556494	0.397434	1.09956	0.794271	0.710866	0.651803	0.975508	0.739645
74.5	0.294619	0.817896	0.806452	0.824621	0.412493	1.09095	0.580454	0.547957	1.02415	0.410365	1.76515	0.608039	0.324393	0.0378613	0.382148	0.451662	0.570012	0.407496	1.10273	0.872396	0.605553	0.916671	0.994045	0.823023
75.5	0.368273	0.870949	0.974085	0.81082	0.358098	1.07373	0.626279	0.463002	0.909156	0.341203	1.67825	0.832053	0.287606	0.0447037	0.462351	0.496045	0.495663	0.530751	1.11858	0.942708	0.746769	0.836059	1.15856	0.761162
76.5	0.34986	0.879791	0.838166	0.783218	0.43969	0.861277	0.513244	0.399286	0.869628	0.387311	1.52618	0.697645	0.270885	0.0431072	0.476505	0.477769	0.477639	0.611244	1.10273	1.09115	0.804213	0.988069	1.06124	0.796127
77.5	0.639875	0.862107	1.11	0.831522	0.435157	1.11966	0.562124	0.539461	1.01337	0.594799	1.738	0.77445	0.254164	0.0383175	0.408096	0.702295	0.547482	0.608728	0.947462	1.22656	0.612733	0.978857	1.12149	0.935987
78.5	0.731943	0.725054	0.924248	0.57965	0.326368	1.25172	0.540739	0.492736	1.13555	0.474917	1.58049	0.652842	0.414688	0.0385456	0.372712	0.68402	0.63535	0.638913	1.06471	0.919271	0.686932	0.863697	1.05197	0.84454
79.5	0.777977	0.79137	0.820043	0.569299	0.321835	1.3723	0.867626	0.989721	1.30804	0.640907	1.52618	0.748848	0.658819	0.0435633	0.403378	0.519542	0.529458	0.596151	1.10907	0.914062	0.775491	0.994979	1.10527	0.855299
80.5	0.474152	1.06548	0.815513	0.614153	0.385295	1.39527	0.794305	1.63962	1.0493	0.991332	1.67282	0.800051	0.601966	0.0447037	0.330251	0.597864	0.450603	0.638913	1.03619	1.08594	0.825754	1.05947	1.31612	0.863367
81.5	0.533996	1.95853	0.79286	0.614153	0.43969	1.49288	0.690435	1.05768	1.01337	0.899115	1.74343	0.902458	0.581901	0.0421949	0.504812	0.668355	0.509181	0.638913	1.02668	0.888021	0.876017	0.829149	1.22344	0.903712
82.5	0.437324	1.17158	0.774737	0.600352	0.498617	1.5503	0.665995	0.892023	1.31522	0.783844	1.77602	0.77445	0.54177	0.0449318	0.698245	0.61875	0.475386	0.691737	1.21998	1.02083	0.96697	0.849878	1.30917	0.970952
83.5	0.520186	1.04337	0.810982	0.655557	0.40796	1.29192	0.757645	0.645655	1.20742	0.604021	2.12362	0.832053	0.585245	0.0488092	0.837422	0.527374	0.484398	0.802415	0.998162	1.0026	0.895165	0.985766	1.41113	1.20764
84.5	0.704323	1.08316	0.761145	0.631405	0.344499	1.31488	0.592674	0.569195	1.32241	0.636297	2.31371	0.896057	0.531737	0.0515462	0.879883	0.639637	0.477639	0.77223	1.00133	1.0625	0.787458	0.836059	1.27442	1.09198
85.5	0.736547	1.18484	0.874411	0.734914	0.435157	1.05076	0.442978	0.552205	0.909156	0.793065	1.98783	1.04327	0.658819	0.0577043	0.771372	0.673576	0.551988	0.882908	1.11541	1.3099	0.861656	0.82224	1.21649	0.973642
86.5	1.02656	0.95937	0.915187	0.596902	0.453289	1.3034	0.507133	0.564948	0.998994	0.7654	1.48816	1.5361	0.622032	0.048353	0.811474	0.623972	0.522699	0.892969	1.09323	1.04688	0.933461	0.918974	1.15393	0.91716
87.5	1.18768	0.809054	0.94237	0.534796	0.553012	1.13689	0.537684	0.632911	0.916343	0.797676	1.62937	1.93292	0.719015	0.0478969	0.870447	0.657912	0.558747	0.855238	0.903099	0.872396	0.969363	1.02953	1.29295	0.884884
88.5	1.02656	1.08758	0.842697	0.472691	0.688999	1.07947	0.580454	0.543709	1.08883	0.663962	2.03672	1.5553	1.0501	0.054055	0.934139	0.678798	0.547482	0.820023	1.09006	1.08333	0.983724	0.958128	1.26051	0.970952
89.5	0.998941	1.25116	0.79739	0.46234	0.648203	1.09095	0.595729	0.475745	1.05649	0.590188	1.96068	1.35689	1.42131	0.0440195	1.06624	0.757121	0.540723	0.870331	1.38792	1.19271	1.07468	0.889032	1.13539	0.925229

## Sheet: uw314
Angle	embryo 1	embryo 2	embryo 3	embryo 4	embryo 5	embryo 6	embryo 7	embryo 8	embryo 9	embryo 10	embryo 11	embryo 12	embryo 13	embryo 14	embryo 15	embryo 16	embryo 17	embryo 18	embryo 19	embryo 20	embryo 21	embryo 22	embryo 23
-89.5	1.27156	1.31423	1.17015	0.890898	0.735849	0.409014	0.669875	1.16927	1.67191	0.659743	0.83321	0.718022	1.06641	1.04237	0.408247	1.34297	1.59529	0.622783	0.773899	0.464179	1.13449	1.08689	0.659902
-88.5	1.29215	1.36858	0.81527	0.65391	0.599057	0.524772	0.684762	1.21146	1.75971	0.525834	0.82215	0.984716	1.49873	0.914355	0.518473	1.17254	2.12373	0.700631	0.62283	0.560518	1.02906	1.20404	0.765735
-87.5	1.44144	1.25988	0.949549	0.684631	0.556604	0.686834	0.739344	1.57008	1.70484	0.532367	0.859018	1.34886	1.45262	0.86559	0.587875	1.14527	1.77476	0.562235	0.718242	0.499212	0.932057	0.859095	0.747058
-86.5	1.426	1.47727	0.834452	0.838234	0.688679	1.08813	0.744306	1.77199	1.77069	0.594422	1.11709	1.26167	1.11828	1.15209	0.918555	1.07028	1.88943	0.717931	0.760648	0.494833	0.8941	1.0218	0.616323
-85.5	1.426	1.64526	0.517936	0.987448	1.08019	1.119	0.669875	1.42844	1.97922	0.561761	1.31986	1.16935	0.841596	0.896068	0.853235	1.0362	1.82462	0.735231	0.77655	0.538623	0.767576	0.852587	0.691029
-84.5	0.978121	1.61067	0.690581	0.776793	1.09434	1.32737	0.650027	1.66652	1.69386	0.594422	1.13921	1.14371	0.628315	0.853398	0.604205	0.974845	1.21641	0.839028	1.1317	0.41601	0.733837	0.930687	0.647451
-83.5	1.24582	1.66996	1.23729	0.860177	1.12736	1.18846	0.605369	1.7961	1.24021	0.656477	1.06179	1.24628	0.749366	1.01798	0.575628	0.974845	1.27624	0.441138	0.840158	0.332808	0.725402	1.08038	0.616323
-82.5	1.27156	1.6749	1.0071	0.728518	0.820755	1.2965	0.650027	1.76295	1.33533	0.702201	1.09866	0.979588	0.645608	1.00579	0.502143	0.968028	1.42081	0.311392	0.731494	0.398494	0.86036	0.963228	0.678578
-81.5	1.53925	1.84783	0.844044	0.899675	0.816038	1.62062	0.888205	1.6846	1.37558	0.943889	0.844271	1.01549	0.587964	0.914355	0.498061	1.30888	1.71494	0.37194	0.77655	0.315292	0.792881	0.846079	0.946274
-80.5	1.08623	2.20356	0.633033	1.084	1.00472	1.40454	1.19089	1.87144	1.4085	0.85244	1.10603	0.918043	0.461148	0.792441	0.542968	0.824869	1.89441	0.415189	0.787151	0.442284	0.725402	0.774487	0.964951
-79.5	0.983269	1.93676	0.776904	1.29904	0.830189	1.05726	1.23059	1.82925	1.55484	0.734862	0.881138	1.07703	0.674429	0.82292	0.461319	0.756698	1.695	0.518986	0.726193	0.613067	1.00797	0.57273	1.09569
-78.5	1.17375	1.07708	0.604259	1.30343	0.853774	1.0727	1.43403	1.72076	1.45606	0.72833	0.962247	0.907785	0.559142	0.86559	0.61237	0.702161	1.5604	0.484387	0.797753	0.582414	1.12606	0.553205	1.03343
-77.5	1.24582	0.894269	0.527527	1.005	0.948113	1.21932	1.36952	1.69665	1.65728	0.757724	0.825837	1.0001	0.547614	0.902164	0.665442	0.613539	1.53547	0.518986	0.885214	0.499212	0.957362	0.488122	0.9525
-76.5	1.45174	1.05731	0.537119	0.987448	1.20755	1.04183	0.94775	1.62131	2.02312	0.956953	0.844271	1.06678	0.5822	0.853398	1.03695	0.565819	1.51553	0.579535	0.924969	0.503591	1.08389	0.585747	1.03966
-75.5	1.60618	0.948617	0.776904	1.10594	1.30189	0.964655	0.962636	1.48269	0.947538	1.0778	0.844271	1.08729	0.547614	0.957025	1.42478	0.579453	1.71993	0.735231	1.04158	0.648099	1.12606	0.598763	0.971176
-74.5	1.53411	1.20553	0.892001	1.05767	1.37736	0.617379	0.94775	1.46762	0.910953	1.28682	0.777909	0.96933	0.593728	0.889973	1.15534	0.729429	1.70996	0.795779	1.28276	0.586793	1.28211	0.598763	1.08323
-73.5	1.52896	1.34881	1.18933	1.07961	0.924528	0.694552	0.908053	1.3531	1.04997	1.0876	1.10972	0.815468	0.726309	0.572996	1.1186	0.852137	2.02901	0.986074	1.10519	0.761955	1.20619	0.728929	1.02721
-72.5	1.81725	1.55632	0.997506	0.956728	1.05189	0.818027	0.982484	1.52488	0.940221	1.29009	1.10603	0.81034	0.881946	0.60957	1.19208	0.886223	2.69206	1.25422	1.13965	0.867052	1.10497	0.904653	1.39451
-71.5	2.09524	1.49209	1.02628	1.11472	1.09434	1.0727	1.30005	1.31694	0.921929	1.30969	1.17608	0.72828	0.841596	0.621762	0.979792	0.743064	1.64515	1.36666	1.06279	0.902084	1.09654	0.702896	1.20774
-70.5	1.79665	1.93676	0.997506	1.27271	1.08491	1.04954	1.18097	1.40433	0.929246	1.49912	1.4784	0.733409	0.818538	0.60957	0.955297	0.606722	1.36597	1.27152	1.10254	0.849536	1.22306	0.702896	1.42564
-69.5	1.58559	1.96146	1.24688	1.1981	1.28774	1.25791	1.24051	1.55803	0.973147	1.4436	1.56688	0.712894	0.709015	0.676623	1.05328	0.749881	1.41084	1.17637	0.938221	0.858294	1.24415	0.696388	1.10191
-68.5	1.47233	2.06522	1.47708	1.09278	1.16981	1.10357	1.16112	1.68761	1.00607	1.47626	1.73278	0.866756	0.697487	0.932642	0.922637	0.858954	1.38591	0.882277	0.893165	0.779471	1.38332	0.618288	1.35716
-67.5	1.10167	2.00099	1.73604	0.838234	1.15094	1.05726	1.14127	1.31393	1.11217	1.38481	1.67748	1.02062	0.760895	1.05456	0.983874	0.756698	1.24632	1.15042	1.02038	1.04659	1.51828	0.794012	1.46299
-66.5	1.39511	2.21344	1.25647	0.829457	1.21226	0.848896	1.28021	1.28982	1.41216	1.21171	1.3088	1.2309	0.778188	0.914355	0.898142	0.668076	1.28621	1.20232	1.03893	1.27868	1.82616	0.885129	1.51279
-65.5	1.32819	2.2332	1.03587	0.794347	1.09434	0.787159	1.36456	1.47365	1.11583	1.24437	1.48946	1.06165	0.893475	1.00579	1.0247	0.770332	1.41582	1.45316	1.05219	1.19986	1.61107	0.982753	1.70578
-64.5	1.27671	1.66502	1.0071	0.772404	0.853774	0.686834	1.45388	1.72679	0.885344	1.29009	1.283	1.22577	0.835831	1.06675	1.06961	0.872588	1.47565	1.08122	0.991227	1.10352	1.39598	0.95672	1.6373
-63.5	1.30759	1.57115	1.08383	0.833845	0.820755	0.686834	1.61763	1.69364	0.96583	1.37827	1.26825	1.49759	0.905003	0.920451	1.09818	1.02938	1.23137	0.76118	1.06279	1.18672	1.26524	0.930687	1.48167
-62.5	1.19434	1.49209	1.08383	0.873343	0.830189	1.14987	1.10654	1.52789	0.837784	1.56771	1.84707	1.46169	0.893475	1.04846	1.03695	1.11119	1.07682	0.700631	0.924969	1.14293	1.3538	1.08689	1.54392
-61.5	1.33333	1.23024	1.54422	1.06206	1.08491	0.918352	0.932864	1.44351	1.10119	1.72774	1.95399	1.42579	0.899239	0.889973	0.89406	0.954394	1.03196	0.899576	1.00978	1.25241	1.34537	1.00228	1.53147
-60.5	1.42085	1.1413	1.36198	1.07083	1.72642	0.802593	0.957674	1.4405	0.812175	1.43706	2.11252	1.09755	0.974176	1.19476	1.01245	0.852137	1.08679	0.994724	1.20856	1.30934	1.11762	1.03482	1.45676
-59.5	1.48777	0.933794	1.4483	0.732906	1.76415	1.26563	0.982484	1.31995	0.830468	1.47299	1.81758	1.036	0.974176	1.35934	0.8614	0.988479	1.44574	1.10717	1.23771	1.2743	1.11341	1.17149	1.33848
-58.5	1.44659	0.701581	1.40994	0.882121	1.77358	0.995524	1.12638	1.26571	0.709739	1.50565	1.70698	0.989845	0.922297	1.24962	0.796081	0.913491	1.356	1.39261	0.919668	1.47574	0.725402	0.826554	1.2202
-57.5	1.14801	0.825099	1.74564	1.00061	1.6934	1.04183	1.43899	1.19037	0.647545	1.35868	1.67748	1.14371	0.783952	0.90826	0.885895	0.995296	1.29618	0.890926	0.728844	1.23489	0.915187	0.722421	1.36338
-56.5	1.15315	0.780632	0.987915	1.16738	1.8066	1.02639	1.93023	0.916132	0.486573	1.33255	2.05722	1.33347	0.818538	0.877781	0.987957	1.00211	1.01201	0.942825	0.662585	1.28744	0.826621	0.813537	1.59995
-55.5	1.10167	0.963439	1.07424	1.11472	1.50943	1.41225	1.61763	0.913118	0.49389	1.36848	1.84339	1.24115	0.778188	1.1277	0.885895	1.02938	1.01201	0.960125	0.789801	1.81293	0.851925	1.06736	1.36338
-54.5	1.10167	1.12648	1.14138	1.11911	1.43868	1.19617	1.28517	0.913118	0.365845	1.65589	1.74016	1.32834	0.75513	1.08504	0.759339	1.08392	1.09676	1.19367	0.93027	1.89175	0.822403	0.820046	1.44431
-53.5	0.936937	0.958498	1.08383	1.09278	1.09434	1.32737	1.05195	1.18735	0.32926	1.52525	1.67379	1.18987	0.593728	1.20085	0.538885	1.56793	0.877412	1.00337	0.895815	1.5896	0.776011	0.741946	1.33225
-52.5	1.19434	0.780632	1.13179	1.13666	0.962264	1.52801	1.0718	1.01257	0.387795	1.45666	1.73278	1.06678	0.518792	1.02408	0.534803	1.30207	0.997059	0.934175	0.93027	1.30934	0.818186	0.754963	1.30735
-51.5	1.23037	0.726285	1.16056	1.084	0.981132	1.52801	1.19089	0.840792	0.299993	1.29009	1.56319	1.06165	0.39774	1.43249	0.694019	1.2748	0.787676	0.813078	0.768599	1.30058	1.05436	0.696388	1.33848
-50.5	1.09653	0.587945	1.02628	1.22882	0.924528	1.32737	0.908053	0.533406	0.318285	1.66569	1.30143	1.25654	0.44962	1.32277	0.714432	1.10437	0.732838	0.847678	0.861361	1.38378	1.40863	0.676863	1.30735
-49.5	0.926641	0.513834	1.15097	0.899675	0.924528	1.36595	1.03707	0.433957	0.351211	1.78653	1.56319	1.21038	0.466913	1.04237	0.632782	1.00893	0.777706	0.864977	0.78185	1.74724	0.978449	1.06736	1.34471
-48.5	0.895753	0.410079	1.5634	0.820679	1.08962	1.3428	1.02218	0.421903	0.285359	1.25416	1.10234	1.0001	0.513027	0.920451	0.481731	1.02256	1.07184	1.02067	0.681138	1.91365	0.788663	0.61178	1.48167
-47.5	1.12227	0.469368	1.04546	0.776793	0.853774	1.46628	0.977522	0.391767	0.292676	1.30642	0.951187	0.877013	0.472677	0.944834	0.440906	0.940759	0.707912	0.674682	0.752697	1.69031	0.657922	0.546697	1.34471
-46.5	1.05019	0.657115	0.728947	0.697797	0.853774	1.21932	1.10654	0.388753	0.299993	0.809981	1.09497	0.964201	0.386212	0.792441	0.436824	0.852137	0.737823	0.674682	0.720893	1.80855	0.657922	0.507647	1.10814
-45.5	1.13771	0.69664	0.776904	0.544194	0.966981	1.40454	1.16608	0.397794	0.278042	0.800183	1.34198	1.14371	0.455384	0.95093	0.412329	0.865771	0.648088	0.700631	0.771249	1.89613	0.67901	0.61178	1.07701
-44.5	0.854569	0.62747	0.594667	0.55736	0.976415	1.39682	1.15616	0.301359	0.25975	0.76099	1.21295	1.21551	0.415033	0.902164	0.428659	0.790783	0.877412	0.691982	0.752697	1.82169	0.704314	0.807029	0.740833
-43.5	0.895753	0.568182	0.585076	0.724129	0.853774	1.09585	1.32486	0.364645	0.340236	0.721798	0.965934	1.3745	0.455384	1.03627	0.481731	0.811235	0.8475	0.683332	0.901116	2.08881	0.708532	0.670355	0.821764
-42.5	0.844273	0.518775	0.709764	0.864566	0.603774	1.17302	1.30502	0.271223	0.325602	0.747926	0.881138	1.8207	0.334332	1.06675	0.428659	1.08392	0.832544	0.475737	0.948822	2.06253	0.733837	0.826554	0.647451
-41.5	0.864865	0.390316	0.892001	0.601246	0.575472	0.987807	1.27028	0.337522	0.193898	0.535633	0.873765	1.40527	0.311275	0.963121	0.367422	1.10437	0.673015	0.562235	0.62548	2.12822	0.619965	0.728929	0.610098
-40.5	0.751609	0.459486	1.09342	0.434477	0.632075	0.787159	1.24547	0.325468	0.256091	0.460513	0.785282	0.943687	0.276689	0.82292	0.342927	0.927125	0.767735	0.38924	0.678487	1.62463	0.510312	0.637813	0.535392
-39.5	0.710425	0.454545	0.767312	0.430089	0.570755	0.779441	1.03707	0.334509	0.215848	0.506238	0.630438	0.948815	0.219045	0.725389	0.302102	1.01575	0.528441	0.285442	0.742095	1.53267	0.577791	0.605272	0.691029
-38.5	0.710425	0.474308	0.316516	0.561748	0.466981	1.13443	0.957674	0.325468	0.25975	0.365798	0.656245	0.989845	0.276689	0.432795	0.273525	0.620356	0.438706	0.441138	0.871962	1.45822	0.700097	0.416531	0.560294
-37.5	0.550837	0.568182	0.335699	0.62319	0.391509	0.987807	0.734382	0.27725	0.2817	0.408257	0.693113	0.88727	0.247867	0.493752	0.359257	0.613539	0.259235	0.37194	0.659935	1.28744	0.704314	0.507647	0.585196
-36.5	0.478764	0.548419	0.345291	0.552971	0.382075	0.848896	0.75423	0.26821	0.25975	0.352734	0.788969	0.753923	0.276689	0.396221	0.334762	0.511282	0.184456	0.294092	0.588376	1.22176	0.67901	0.585747	0.529166
-35.5	0.422136	0.543478	0.383656	0.55736	0.391509	0.825745	0.818737	0.256155	0.186581	0.378862	0.726294	0.68725	0.247867	0.365742	0.310267	0.511282	0.1695	0.38059	0.455859	1.24365	0.531399	0.68988	0.560294
-34.5	0.422136	0.632411	0.278151	0.675854	0.330189	0.794876	0.744306	0.26821	0.175605	0.401724	0.670992	0.743666	0.22481	0.402316	0.310267	0.449928	0.174485	0.345991	0.437306	1.16921	0.324744	0.501139	0.535392
-33.5	0.396396	0.523715	0.268559	0.978671	0.419811	0.794876	0.927902	0.198897	0.226824	0.447449	0.803716	0.56416	0.161402	0.432795	0.26536	0.238598	0.124632	0.345991	0.450558	1.1298	0.358483	0.579239	0.796862
-32.5	0.41184	0.543478	0.326108	0.838234	0.353774	1.0727	0.605369	0.174788	0.139021	0.404991	0.6968	0.753923	0.247867	0.457178	0.269443	0.279501	0.0797647	0.415189	0.455859	1.02032	0.328961	0.676863	0.57897
-31.5	0.30888	0.583004	0.297334	0.443255	0.415094	0.926069	0.496204	0.168761	0.157313	0.375596	0.586197	0.666735	0.247867	0.463273	0.310267	0.25905	0.119647	0.320042	0.482362	0.836399	0.257265	0.715913	0.529166
-30.5	0.267696	0.62253	0.230194	0.373036	0.396226	0.872048	0.496204	0.108489	0.128046	0.346202	0.453473	0.589804	0.242103	0.402316	0.26536	0.231781	0.179471	0.268143	0.381649	0.845157	0.236177	0.657338	0.491813
-29.5	0.262548	0.578063	0.182237	0.272097	0.424528	0.764007	0.382077	0.0843806	0.131704	0.424587	0.497714	0.56416	0.201752	0.341359	0.269443	0.340855	0.154544	0.302742	0.296838	0.648099	0.295222	0.605272	0.504264
-28.5	0.28314	0.597826	0.172645	0.254542	0.363208	0.879765	0.342381	0.0843806	0.124387	0.320073	0.516148	0.574418	0.207517	0.17068	0.33068	0.238598	0.204397	0.181645	0.265034	0.805745	0.303657	0.631305	0.44201
-27.5	0.252252	0.642292	0.163054	0.232599	0.476415	0.679117	0.46147	0.0873941	0.146338	0.274348	0.464533	0.466715	0.22481	0.195062	0.334762	0.299952	0.204397	0.224894	0.299488	0.757576	0.303657	0.670355	0.280147
-26.5	0.277992	0.400198	0.124688	0.245765	0.45283	0.717703	0.456508	0.111503	0.153655	0.26455	0.379738	0.543646	0.230574	0.176775	0.187793	0.293135	0.189441	0.164346	0.302139	0.665616	0.303657	0.423039	0.199216
-25.5	0.23166	0.34585	0.153462	0.29404	0.528302	0.771724	0.43666	0.0783534	0.124387	0.287413	0.401858	0.574418	0.247867	0.152393	0.212288	0.368123	0.264221	0.181645	0.315391	0.626204	0.253047	0.501139	0.205441
-24.5	0.272844	0.370553	0.13428	0.280874	0.70283	0.787159	0.342381	0.0964349	0.142679	0.258018	0.390798	0.661606	0.311275	0.152393	0.142886	0.334038	0.199412	0.216244	0.318041	0.499212	0.194003	0.38399	0.155637
-23.5	0.252252	0.365613	0.13428	0.201878	0.622642	0.625096	0.307647	0.0873941	0.109753	0.23189	0.47928	0.461586	0.288218	0.158488	0.212288	0.293135	0.0797647	0.207594	0.315391	0.420389	0.341614	0.449073	0.136961
-22.5	0.442728	0.41996	0.13428	0.215044	0.518868	0.6714	0.317571	0.0873941	0.0804858	0.287413	0.564076	0.369269	0.334332	0.207254	0.212288	0.306769	0.08475	0.276793	0.381649	0.464179	0.253047	0.553205	0.0684804
-21.5	0.303732	0.370553	0.0959141	0.315983	0.448113	0.655965	0.277874	0.081367	0.0658521	0.382128	0.549329	0.466715	0.340097	0.17068	0.273525	0.25905	0.0697941	0.190295	0.341894	0.41601	0.19822	0.462089	0.130735
-20.5	0.324324	0.385375	0.153462	0.22821	0.5	0.432165	0.282836	0.066299	0.0987781	0.356	0.475594	0.60519	0.22481	0.0731484	0.240865	0.272684	0.0747794	0.224894	0.352495	0.407252	0.160263	0.455581	0.105833
-19.5	0.339768	0.390316	0.153462	0.223822	0.45283	0.354993	0.272912	0.066299	0.0987781	0.284147	0.405545	0.384655	0.155638	0.060957	0.171464	0.252233	0.0797647	0.259493	0.331293	0.398494	0.164481	0.683371	0.149412
-18.5	0.391248	0.508893	0.115097	0.280874	0.518868	0.2238	0.238178	0.0602718	0.0512183	0.24822	0.35393	0.302595	0.172931	0.0731484	0.208206	0.293135	0.124632	0.216244	0.315391	0.376598	0.139176	0.475106	0.0747058
-17.5	0.272844	0.340909	0.105505	0.298429	0.504717	0.185214	0.223292	0.066299	0.0512183	0.225358	0.36499	0.389784	0.195988	0.0304785	0.261278	0.218147	0.0797647	0.250843	0.265034	0.477317	0.134958	0.442564	0.112059
-16.5	0.262548	0.340909	0.115097	0.298429	0.438679	0.254669	0.24314	0.0843806	0.0695105	0.215559	0.549329	0.333368	0.195988	0.0914355	0.200041	0.286318	0.239294	0.181645	0.251782	0.429147	0.101219	0.403514	0.12451
-15.5	0.339768	0.227273	0.13428	0.280874	0.400943	0.154345	0.272912	0.0843806	0.0695105	0.235156	0.23964	0.338496	0.242103	0.0792441	0.187793	0.42266	0.0947206	0.155696	0.212027	0.424768	0.113871	0.292873	0.0996078
-14.5	0.272844	0.222332	0.0959141	0.245765	0.334906	0.192931	0.248102	0.0843806	0.0878027	0.23189	0.0995428	0.415427	0.190224	0.0792441	0.191876	0.381757	0.129618	0.181645	0.193475	0.499212	0.109654	0.357956	0.130735
-13.5	0.416988	0.177866	0.143871	0.19749	0.254717	0.625096	0.213368	0.0934213	0.11707	0.26455	0.0921693	0.425685	0.207517	0.060957	0.216371	0.402209	0.0299118	0.121097	0.23058	0.451042	0.0927839	0.260332	0.118284
-12.5	0.138996	0.222332	0.115097	0.201878	0.287736	0.625096	0.342381	0.0934213	0.0658521	0.313541	0.132724	0.456457	0.311275	0.0853398	0.261278	0.504465	0.0697941	0.216244	0.196125	0.464179	0.0548269	0.364465	0.174314
-11.5	0.175032	0.217391	0.0575484	0.206267	0.268868	0.409014	0.406887	0.0723262	0.131704	0.254752	0.140097	0.292338	0.201752	0.0670527	0.187793	0.313586	0.0448676	0.224894	0.180223	0.595551	0.0548269	0.390498	0.161863
-10.5	0.144144	0.197628	0.115097	0.26332	0.391509	0.347276	0.163747	0.0301359	0.135363	0.391926	0.140097	0.353882	0.213281	0.103627	0.261278	0.279501	0.0747794	0.207594	0.214678	0.547381	0.0801316	0.501139	0.0996078
-9.5	0.118404	0.153162	0.115097	0.201878	0.424528	0.262386	0.129013	0.0783534	0.193898	0.26455	0.136411	0.40517	0.270925	0.0914355	0.31435	0.245416	0.0697941	0.268143	0.206727	0.464179	0.0759141	0.351448	0.0996078
-8.5	0.0978121	0.286561	0.13428	0.201878	0.495283	0.2238	0.114127	0.066299	0.201215	0.160037	0.140097	0.369269	0.299746	0.0731484	0.285773	0.231781	0.0448676	0.216244	0.180223	0.315292	0.0379571	0.30589	0.0622549
-7.5	0.123552	0.266798	0.153462	0.206267	0.245283	0.146628	0.129013	0.0421903	0.237799	0.228624	0.136411	0.40517	0.144109	0.0975312	0.31435	0.231781	0.0498529	0.198945	0.143118	0.385356	0.0421745	0.273349	0.0871568
-6.5	0.118404	0.311265	0.153462	0.22821	0.198113	0.0848896	0.0843547	0.0391767	0.149996	0.156771	0.117977	0.353882	0.311275	0.0670527	0.404164	0.224964	0.0448676	0.155696	0.161671	0.586793	0.0506094	0.370973	0.0684804
-5.5	0.169884	0.237154	0.172645	0.166769	0.259434	0.108041	0.0893167	0.0542446	0.179264	0.186165	0.12535	0.297466	0.322804	0.0914355	0.424576	0.238598	0.0348971	0.103797	0.15902	0.569277	0.0632618	0.253824	0.0809313
-4.5	0.0772201	0.350791	0.0959141	0.201878	0.20283	0.108041	0.0744306	0.0542446	0.208531	0.225358	0.191712	0.292338	0.484206	0.12801	0.493978	0.170427	0.0498529	0.112447	0.169622	0.341566	0.0716967	0.292873	0.0933823
-3.5	0.118404	0.242095	0.239785	0.149214	0.29717	0.0694552	0.0942788	0.0271223	0.248774	0.176367	0.110603	0.230793	0.691722	0.0975312	0.673607	0.224964	0.0548382	0.129747	0.121916	0.249606	0.0885665	0.299382	0.0622549
-2.5	0.190476	0.222332	0.124688	0.26332	0.264151	0.0771724	0.0645065	0.0241087	0.106095	0.202495	0.176965	0.353882	0.374683	0.0975312	0.453154	0.109074	0.0897353	0.0518986	0.132517	0.23209	0.122306	0.260332	0.0560294
-1.5	0.108108	0.340909	0.211011	0.315983	0.334906	0.0463034	0.0595445	0.0331495	0.190239	0.202495	0.0847958	0.297466	0.334332	0.0975312	0.59604	0.177245	0.0747794	0.103797	0.148419	0.249606	0.113871	0.188741	0.0933823
-0.5	0.164736	0.296443	0.163054	0.302818	0.40566	0.0771724	0.0198482	0.0241087	0.131704	0.280881	0.154844	0.194892	0.247867	0.0853398	0.636865	0.143159	0.08475	0.0864977	0.169622	0.223332	0.122306	0.331923	0.0809313
0.5	0.159588	0.163043	0.163054	0.188712	0.386792	0.0540207	0.0446584	0.015068	0.157313	0.258018	0.151158	0.164119	0.311275	0.0975312	0.710349	0.184062	0.0747794	0.103797	0.177573	0.192678	0.147611	0.26684	0.0622549
1.5	0.20592	0.251976	0.115097	0.144826	0.339623	0.0771724	0.0148861	0.0241087	0.0987781	0.316807	0.173278	0.302595	0.270925	0.0853398	1.28598	0.129525	0.0697941	0.112447	0.217328	0.188299	0.143393	0.364465	0.0747058
2.5	0.0978121	0.256917	0.182237	0.136048	0.382075	0.030869	0.0148861	0.0210951	0.106095	0.235156	0.147471	0.266694	0.282453	0.0975312	1.17983	0.190879	0.0548382	0.0778479	0.164321	0.175162	0.109654	0.312398	0.0684804
3.5	0.149292	0.271739	0.124688	0.0965505	0.132075	0.0617379	0.0297722	0.0391767	0.153655	0.241688	0.154844	0.28208	0.293982	0.103627	1.05328	0.149976	0.0997059	0.172995	0.219978	0.218953	0.109654	0.292873	0.0311274
4.5	0.108108	0.335968	0.172645	0.136048	0.122642	0.0540207	0.0645065	0.0210951	0.160972	0.192697	0.169592	0.317981	0.201752	0.0792441	0.779751	0.184062	0.0498529	0.0951475	0.238531	0.131372	0.105436	0.292873	0.0249019
5.5	0.133848	0.251976	0.182237	0.166769	0.141509	0.0385862	0.0396963	0.0241087	0.0768274	0.244954	0.154844	0.205149	0.259396	0.0548613	0.751174	0.218147	0.0947206	0.0518986	0.249132	0.153267	0.118089	0.38399	0.0684804
6.5	0.10296	0.167984	0.124688	0.210656	0.169811	0.0231517	0.0347343	0.0120544	0.0658521	0.267816	0.110603	0.225664	0.270925	0.0792441	0.669524	0.368123	0.08475	0.0605484	0.251782	0.126992	0.0885665	0.455581	0.0498039
7.5	0.133848	0.177866	0.182237	0.258931	0.174528	0.0154345	0.0148861	0.0331495	0.0914612	0.173101	0.132724	0.287209	0.276689	0.103627	0.669524	0.265867	0.0697941	0.0778479	0.265034	0.162025	0.0927839	0.377481	0.0747058
8.5	0.20592	0.0988142	0.182237	0.368647	0.207547	0.00771724	0.0297722	0.0301359	0.0987781	0.156771	0.081109	0.169248	0.334332	0.0853398	0.587875	0.306769	0.0697941	0.0432489	0.302139	0.113855	0.134958	0.338431	0.0560294
9.5	0.288288	0.034585	0.220602	0.149214	0.0849057	0.030869	0.0148861	0.0391767	0.0695105	0.182899	0.154844	0.194892	0.242103	0.0914355	0.489896	0.102256	0.0498529	0.0605484	0.291537	0.0963391	0.0885665	0.475106	0.118284
10.5	0.344916	0.06917	0.13428	0.215044	0.0801887	0.0231517	0.0645065	0.0421903	0.0987781	0.160037	0.11429	0.179506	0.26516	0.0853398	0.506226	0.109074	0.0149559	0.0951475	0.209377	0.109476	0.147611	0.351448	0.0435784
11.5	0.303732	0.034585	0.0863227	0.22821	0.15566	0.030869	0.0645065	0.0331495	0.0951196	0.160037	0.129037	0.117961	0.334332	0.0792441	0.526638	0.115891	0.0448676	0.147046	0.209377	0.100718	0.21509	0.397006	0.0622549
12.5	0.190476	0.0592885	0.163054	0.329149	0.165094	0.0463034	0	0.0271223	0.109753	0.225358	0.158531	0.0923172	0.35739	0.121914	0.620535	0.129525	0.0249265	0.0951475	0.174922	0.126992	0.143393	0.403514	0.0373529
13.5	0.159588	0.0543478	0.153462	0.26332	0.198113	0.0231517	0.0198482	0.0421903	0.149996	0.146972	0.199086	0.0820597	0.317039	0.0975312	0.400082	0.102256	0.0747794	0.0951475	0.188174	0.087581	0.151828	0.370973	0.0747058
14.5	0.216216	0.0197628	0.172645	0.179935	0.188679	0.0231517	0.0297722	0.0210951	0.106095	0.218826	0.173278	0.0410298	0.807009	0.115818	0.220453	0.218147	0.0348971	0.0864977	0.225279	0.153267	0.143393	0.312398	0.0560294
15.5	0.190476	0.0247036	0.0863227	0.215044	0.235849	0.0231517	0.0198482	0.0301359	0.0804858	0.169835	0.154844	0.056416	0.553378	0.140201	0.155134	0.238598	0.0548382	0.0518986	0.15902	0.122613	0.172916	0.370973	0.0996078
16.5	0.113256	0.0197628	0.0671398	0.149214	0.193396	0.0231517	0.00496204	0.0210951	0.0548767	0.241688	0.165905	0.0718022	0.443855	0.0670527	0.151051	0.272684	0.0548382	0.0345991	0.198776	0.162025	0.156046	0.312398	0.0498039
17.5	0.113256	0.0296443	0.047957	0.109716	0.150943	0.030869	0.0396963	0.0361631	0.0731689	0.287413	0.206459	0.0205149	0.340097	0.121914	0.187793	0.231781	0.0747794	0.0778479	0.15637	0.105097	0.172916	0.26684	0.0809313
18.5	0.10296	0.0543478	0.0959141	0.0789959	0.193396	0.0231517	0.0545824	0.0361631	0.0768274	0.300477	0.169592	0.0666735	0.44962	0.152393	0.151051	0.299952	0.0548382	0.0691982	0.15902	0.135751	0.134958	0.331923	0.112059
19.5	0.164736	0.0494071	0.13428	0.0658299	0.132075	0.030869	0.0248102	0.0361631	0.113412	0.254752	0.162218	0.0512873	0.351626	0.225541	0.163299	0.340855	0.0448676	0.0951475	0.23323	0.144509	0.227742	0.292873	0.149412
20.5	0.1287	0.034585	0.143871	0.0658299	0.264151	0.0385862	0.00496204	0.0271223	0.0804858	0.290679	0.195399	0.056416	0.311275	0.243828	0.183711	0.511282	0.0648088	0.0864977	0.15637	0.18392	0.151828	0.234299	0.12451
21.5	0.185328	0.0197628	0.431613	0.0394979	0.20283	0.0154345	0.0148861	0.0331495	0.0841443	0.313541	0.154844	0.0512873	0.276689	0.195062	0.269443	0.306769	0.0398823	0.103797	0.172272	0.175162	0.236177	0.34494	0.168088
22.5	0.169884	0.0494071	0.249377	0.0658299	0.198113	0.100324	0.0148861	0.0843806	0.0951196	0.349468	0.132724	0.0512873	0.236338	0.225541	0.29802	0.245416	0.0648088	0.112447	0.166971	0.157646	0.134958	0.338431	0.236569
23.5	0.216216	0.0197628	0.258968	0.0746072	0.231132	0.13891	0.00496204	0.102462	0.0658521	0.300477	0.121663	0.0512873	0.288218	0.207254	0.387834	0.197696	0.0947206	0.147046	0.262384	0.131372	0.210873	0.273349	0.298823
24.5	0.211068	0.0296443	0.172645	0.0614412	0.226415	0.162062	0.00496204	0.123557	0.0914612	0.365798	0.0884825	0.0871884	0.242103	0.109723	0.26536	0.197696	0.0797647	0.121097	0.257083	0.148888	0.227742	0.370973	0.230343
25.5	0.175032	0.034585	0.191828	0.0482753	0.146226	0.169779	0.00496204	0.15972	0.113412	0.307009	0.11429	0.0923172	0.282453	0.158488	0.240865	0.136342	0.0648088	0.0951475	0.30744	0.126992	0.219307	0.214774	0.168088
26.5	0.190476	0.0148221	0.0959141	0.0438866	0.311321	0.216083	0.0198482	0.0632854	0.0914612	0.362532	0.143784	0.056416	0.455384	0.182871	0.257195	0.16361	0.0548382	0.190295	0.283586	0.188299	0.18135	0.273349	0.149412
27.5	0.169884	0.0543478	0.163054	0.0526639	0.334906	0.216083	0.00992408	0.0632854	0.0475598	0.352734	0.143784	0.056416	0.391976	0.158488	0.285773	0.16361	0.0348971	0.155696	0.341894	0.166404	0.274134	0.325415	0.12451
28.5	0.0566281	0.0296443	0.163054	0.0658299	0.424528	0.239234	0.00496204	0.0512311	0.0548767	0.369064	0.0958561	0.056416	0.507263	0.12801	0.387834	0.197696	0.0548382	0.181645	0.339244	0.218953	0.282569	0.331923	0.236569
29.5	0.0875161	0.0296443	0.115097	0.0702186	0.457547	0.200648	0.0148861	0.0693126	0.106095	0.349468	0.129037	0.0666735	0.501499	0.195062	0.387834	0.286318	0.0398823	0.233544	0.331293	0.144509	0.303657	0.338431	0.323725
30.5	0.0514801	0.0296443	0.163054	0.0921619	0.716981	0.13891	0.0148861	0.0542446	0.0658521	0.342936	0.11429	0.0461586	0.466913	0.249924	0.261278	0.177245	0.0348971	0.207594	0.283586	0.192678	0.324744	0.423039	0.286372
31.5	0.0669241	0.0247036	0.153462	0.0702186	0.688679	0.154345	0.0248102	0.0482175	0.0768274	0.333137	0.0958561	0.0461586	0.368919	0.444986	0.257195	0.177245	0.0747794	0.259493	0.254433	0.214573	0.354266	0.475106	0.286372
32.5	0.046332	0.034585	0.182237	0.127271	0.566038	0.146628	0.0297722	0.0572582	0.0621936	0.411523	0.110603	0.056416	0.415033	0.512039	0.289855	0.177245	0.0548382	0.285442	0.296838	0.188299	0.375353	0.53368	0.323725
33.5	0.0514801	0.0296443	0.211011	0.140437	0.457547	0.123476	0.0496204	0.066299	0.106095	0.391926	0.0774222	0.0871884	0.340097	0.646144	0.200041	0.170427	0.0947206	0.406539	0.323342	0.18392	0.44705	0.501139	0.280147
34.5	0.0566281	0.0296443	0.326108	0.329149	0.490566	0.162062	0.138937	0.0723262	0.168289	0.336403	0.0847958	0.0512873	0.363154	0.755867	0.24903	0.299952	0.139588	0.345991	0.31274	0.262743	0.392223	0.767979	0.398431
35.5	0.041184	0.0296443	0.268559	0.377425	0.466981	0.146628	0.282836	0.0452039	0.186581	0.316807	0.117977	0.0461586	0.455384	0.853398	0.367422	0.736247	0.0697941	0.276793	0.251782	0.148888	0.379571	0.61178	0.26147
36.5	0.046332	0.034585	0.258968	0.254542	0.45283	0.162062	0.0396963	0.0482175	0.274384	0.349468	0.110603	0.117961	0.420798	1.31058	0.359257	0.524916	0.0498529	0.328691	0.304789	0.227711	0.442832	0.390498	0.367304
37.5	0.0617761	0.0494071	0.211011	0.311595	0.490566	0.246952	0.119089	0.0783534	0.468281	0.356	0.0884825	0.102575	0.536085	0.853398	0.363339	0.477197	0.0348971	0.544936	0.352495	0.205815	0.552486	0.208266	0.329951
38.5	0.0617761	0.034585	0.249377	0.35987	0.410377	0.254669	0.119089	0.081367	0.460964	0.267816	0.140097	0.0871884	0.564907	0.902164	0.391917	0.484014	0.0348971	0.510336	0.336593	0.205815	0.46392	0.195249	0.361078
39.5	0.0926641	0.0642292	0.220602	0.311595	0.429245	0.246952	0.143899	0.0632854	0.395112	0.333137	0.151158	0.128218	0.651372	1.09723	0.416412	0.42266	0.0548382	0.397889	0.384299	0.258364	0.607313	0.338431	0.504264
40.5	0.0926641	0.0543478	0.364473	0.311595	0.382075	0.324124	0.124051	0.111503	0.303651	0.450715	0.129037	0.133347	0.616786	1.15209	0.498061	0.409026	0.114662	0.354641	0.426705	0.240848	0.590443	0.377481	0.82799
41.5	0.0669241	0.0395257	0.41243	0.241376	0.292453	0.478469	0.173671	0.105476	0.230482	0.375596	0.110603	0.0820597	0.587964	0.877781	0.514391	0.299952	0.0548382	0.337341	0.532718	0.218953	0.64527	0.325415	0.485588
42.5	0.211068	0.0247036	0.47957	0.4257	0.259434	0.571076	0.158785	0.129584	0.25975	0.310275	0.0589884	0.148733	0.62255	0.999695	0.428659	0.368123	0.0598235	0.302742	0.636082	0.223332	0.531399	0.299382	0.616323
43.5	0.18018	0.0444664	0.402839	0.579303	0.264151	0.470752	0.233216	0.129584	0.237799	0.254752	0.0700487	0.184634	0.674429	0.975312	0.444989	0.334038	0.0598235	0.268143	0.54862	0.253985	0.455485	0.26684	0.597647
44.5	0.15444	0.0592885	0.585076	0.605635	0.179245	0.401296	0.223292	0.111503	0.237799	0.241688	0.10323	0.225664	0.789716	1.20085	0.395999	0.415843	0.0299118	0.320042	0.606928	0.306534	0.46392	0.279857	0.392206
45.5	0.190476	0.0395257	0.460387	0.552971	0.254717	0.331841	0.228254	0.135612	0.186581	0.274348	0.117977	0.256437	0.88771	1.00579	0.461319	0.436294	0.0598235	0.294092	0.651984	0.227711	0.48079	0.214774	0.311274
46.5	0.164736	0.0494071	0.364473	0.49153	0.287736	0.316407	0.272912	0.15972	0.139021	0.244954	0.154844	0.307724	1.14711	1.06675	0.485813	0.538551	0.0498529	0.320042	0.734144	0.166404	0.497659	0.292873	0.329951
47.5	0.149292	0.0395257	0.450796	0.346704	0.391509	0.36271	0.248102	0.123557	0.160972	0.323339	0.165905	0.415427	0.691722	1.20695	0.575628	0.579453	0.0548382	0.242194	0.768599	0.162025	0.485007	0.253824	0.273921
48.5	0.133848	0.034585	0.460387	0.337927	0.306604	0.30869	0.327495	0.189856	0.153655	0.254752	0.140097	0.435942	0.720544	0.944834	0.542968	0.538551	0.184456	0.493037	0.826906	0.192678	0.510312	0.397006	0.26147
49.5	0.149292	0.0790514	0.469979	0.320372	0.283019	0.300972	0.347343	0.177802	0.215848	0.23189	0.151158	0.476972	0.772423	0.889973	0.485813	0.572636	0.339	0.596834	0.662585	0.122613	0.535616	0.416531	0.26147
50.5	0.144144	0.326087	0.537119	0.324761	0.316038	0.2238	0.332457	0.283278	0.186581	0.24822	0.169592	0.435942	0.709015	0.86559	0.436824	0.661258	0.25425	1.02932	0.641382	0.122613	0.472355	0.494631	0.249019
51.5	0.1287	0.202569	0.517936	0.302818	0.278302	0.316407	0.347343	0.373685	0.190239	0.205761	0.180652	0.441071	0.71478	0.743676	0.436824	0.449928	0.179471	1.09852	0.649333	0.083202	0.586226	0.618288	0.230343
52.5	0.23166	0.172925	0.661807	0.285263	0.367925	0.285538	0.312609	0.39478	0.241458	0.277614	0.165905	0.451328	0.749366	0.761963	0.538885	0.477197	0.284162	0.960125	0.530068	0.113855	0.442832	0.741946	0.311274
53.5	0.138996	0.340909	1.31402	0.452032	0.221698	0.285538	0.332457	0.289305	0.237799	0.261284	0.22858	0.353882	0.743602	0.810728	0.734844	0.456746	0.299118	0.916876	0.551271	0.113855	0.43018	0.735438	0.298823
54.5	0.123552	0.291502	1.33321	0.58808	0.325472	0.231517	0.327495	0.3104	0.226824	0.349468	0.324436	0.348754	0.864653	0.670527	0.787916	0.443111	0.25425	1.28017	0.583075	0.083202	0.39644	0.813537	0.342402
55.5	0.0978121	0.395257	1.14138	0.469587	0.325472	0.293255	0.377115	0.337522	0.285359	0.290679	0.291255	0.333368	0.75513	0.676623	0.853235	0.606722	0.343985	1.03797	0.514166	0.122613	0.371136	1.15197	0.236569
56.5	0.113256	0.271739	1.1126	0.478364	0.316038	0.370428	0.367191	0.301359	0.548767	0.375596	0.361304	0.338496	0.628315	0.597379	0.689937	0.572636	0.68797	0.847678	0.487663	0.105097	0.400658	1.50342	0.373529
57.5	0.0720721	0.331028	1.06465	0.373036	0.363208	0.393579	0.43666	0.274237	0.830468	0.362532	0.379738	0.348754	0.48997	0.603475	0.571545	0.449928	0.483573	0.916876	0.487663	0.14013	0.43018	0.87862	0.38598
58.5	0.0566281	0.217391	0.959141	0.399368	0.358491	0.393579	0.545824	0.355604	0.826809	0.421321	0.372364	0.359011	0.524556	0.603475	0.600122	0.37494	0.398823	0.899576	0.445257	0.214573	0.421745	0.68988	0.691029
59.5	0.0772201	0.217391	0.604259	0.399368	0.278302	0.409014	0.650027	0.319441	0.976805	0.489908	0.243327	0.36414	0.478441	0.536422	0.661359	0.531734	0.448676	0.890926	0.434656	0.218953	0.379571	0.605272	0.840441
60.5	0.0875161	0.242095	0.824861	0.605635	0.259434	0.601945	0.620255	0.367658	0.973147	0.499706	0.291255	0.425685	0.443855	0.701006	0.604205	0.947577	0.418765	1.09852	0.410803	0.245227	0.417528	0.559714	0.622549
61.5	0.0772201	0.237154	0.68099	0.535416	0.254717	0.6714	0.392001	0.464093	0.859735	0.721798	0.313376	0.36414	0.472677	0.670527	0.661359	0.743064	0.363926	1.27152	0.429355	0.240848	0.400658	0.930687	0.616323
62.5	0.138996	0.182806	0.537119	0.636356	0.259434	0.748572	0.426735	0.464093	0.812175	0.74466	0.269134	0.36414	0.593728	0.597379	0.587875	0.661258	0.588265	1.28882	0.458509	0.166404	0.493442	0.520664	0.554068
63.5	0.190476	0.27668	0.61385	0.732906	0.273585	0.640531	0.357267	0.485188	0.874369	0.679339	0.298629	0.317981	0.432326	0.390125	0.530721	0.531734	0.478588	1.49641	0.487663	0.201436	0.577791	0.403514	0.547843
64.5	0.216216	0.281621	0.441205	0.645133	0.311321	0.563359	0.392001	0.548474	0.823151	0.538899	0.317062	0.359011	0.611021	0.481561	0.685854	0.545368	0.433721	1.25422	0.561872	0.175162	0.619965	0.449073	0.666127
65.5	0.185328	0.158103	0.450796	0.675854	0.330189	0.563359	0.481318	0.464093	0.867052	0.463779	0.309689	0.369269	0.536085	0.542518	0.726679	0.606722	0.363926	1.47911	0.556572	0.144509	0.552486	0.34494	0.541617
66.5	0.216216	0.133399	0.700173	0.710963	0.301887	0.58651	0.788964	0.530392	1.07558	0.378862	0.224893	0.317981	0.420798	0.444986	0.620535	0.783966	0.339	1.30612	0.670536	0.258364	0.560921	0.312398	0.610098
67.5	0.164736	0.13834	0.450796	0.904064	0.363208	0.493903	0.818737	0.669017	1.03534	0.457247	0.243327	0.389784	0.466913	0.353551	0.677689	0.497648	0.324044	1.49641	0.720893	0.236469	0.476572	0.318907	0.516715
68.5	0.15444	0.118577	0.537119	0.94795	0.40566	0.424448	0.828661	0.690112	1.04997	0.359266	0.276508	0.461586	0.426562	0.432795	0.538885	0.415843	0.59325	1.35801	0.784501	0.205815	0.493442	0.260332	0.392206
69.5	0.200772	0.133399	0.508345	1.03572	0.320755	0.478469	0.724458	0.714221	1.30241	0.349468	0.272821	0.533388	0.48997	0.365742	0.54705	0.518099	0.777706	1.47046	0.800403	0.223332	0.556704	0.34494	0.373529
70.5	0.252252	0.133399	0.604259	0.763627	0.386792	0.463034	0.72942	0.879969	1.13778	0.352734	0.298629	0.4462	0.351626	0.353551	0.506226	0.497648	0.767735	1.38396	0.734144	0.227711	0.560921	0.357956	0.398431
71.5	0.241956	0.202569	0.68099	0.746072	0.410377	0.486186	0.858433	1.03065	1.35363	0.336403	0.302315	0.533388	0.495734	0.390125	0.836905	0.613539	0.747794	1.40991	0.975325	0.236469	0.69588	0.429548	0.516715
72.5	0.319176	0.27668	0.565893	0.706574	0.438679	0.609662	0.992408	0.919145	1.30607	0.460513	0.247014	0.543646	0.438091	0.426699	1.03286	0.572636	0.682985	1.34071	1.03893	0.23209	0.653705	0.38399	0.504264
73.5	0.241956	0.34585	0.633033	0.789959	0.462264	0.524772	0.92294	1.109	1.09388	0.532367	0.247014	0.451328	0.564907	0.469369	0.840988	0.524916	0.802632	1.17637	0.946172	0.262743	0.801316	0.449073	0.504264
74.5	0.33462	0.380435	0.431613	0.741683	0.650943	0.401296	0.600407	1.02161	1.09388	0.476844	0.283881	0.435942	0.559142	0.438891	0.889978	0.504465	0.892368	0.977424	1.00448	0.253985	0.830838	0.468597	0.541617
75.5	0.314028	0.395257	0.517936	0.737295	0.872642	0.401296	0.774078	1.06078	1.09388	0.529101	0.283881	0.353882	0.951118	0.402316	0.734844	0.47038	0.842515	0.916876	0.996528	0.27588	0.830838	0.566222	0.454461
76.5	0.43758	0.607708	0.565893	0.710963	0.641509	0.378145	0.654989	1.25365	1.10485	0.555229	0.309689	0.389784	0.974176	0.554709	0.808328	0.47038	0.787676	0.882277	0.975325	0.271501	0.864578	0.436056	0.535392
77.5	0.602317	0.597826	0.54671	0.741683	0.495283	0.300972	0.669875	1.17831	1.10119	0.741394	0.276508	0.512873	0.881946	0.499848	0.849153	0.961211	0.717882	0.735231	0.85871	0.280259	0.826621	0.416531	0.678578
78.5	0.813385	0.568182	0.700173	0.904064	0.424528	0.370428	0.77904	1.21749	1.1707	0.463779	0.269134	0.425685	0.783952	0.463273	0.714432	0.668076	0.77272	0.622783	0.723543	0.337187	0.86036	0.462089	0.473137
79.5	0.643501	0.612648	0.527527	1.36048	0.466981	0.246952	0.788964	1.48871	1.20729	0.447449	0.2507	0.466715	0.812774	0.52423	1.01653	0.763515	0.852485	0.570885	0.659935	0.271501	0.754924	0.442564	0.547843
80.5	0.725869	0.741107	0.671398	1.2376	0.339623	0.370428	0.605369	1.3079	1.38655	0.408257	0.258074	0.425685	1.27969	0.548613	0.94305	0.674893	0.802632	0.562235	0.707641	0.302154	0.864578	0.585747	0.647451
81.5	0.777349	0.958498	0.805678	1.02256	0.325472	0.401296	0.724458	1.25667	1.46338	0.460513	0.23964	0.461586	1.78119	0.487656	1.0002	0.518099	0.867441	0.527636	0.585725	0.289017	0.818186	0.520664	0.616323
82.5	0.803089	1.26482	0.824861	1.11911	0.462264	0.324124	0.863395	1.12106	1.50362	0.489908	0.306002	0.507744	1.18169	0.597379	0.975709	0.538551	1.00204	0.579535	0.62548	0.302154	1.00797	0.566222	0.715931
83.5	0.756757	1.33893	0.585076	1.23321	0.580189	0.370428	0.808813	1.21146	1.19631	0.551963	0.36499	0.579547	0.956883	0.457178	0.84507	0.620356	0.967147	0.518986	0.522117	0.297775	0.982666	0.559714	0.566519
84.5	1.10167	1.06719	0.585076	1.31221	0.5	0.36271	0.868357	1.12106	1.16339	0.568293	0.36499	0.610319	0.951118	0.487656	0.624617	0.688527	1.01201	0.449788	0.596327	0.354703	0.784446	0.68988	0.547843
85.5	1.42085	1.10672	0.671398	0.855789	0.438679	0.270103	0.788964	1.13914	1.28412	0.48011	0.534582	0.60519	1.29122	0.597379	0.534803	0.668076	0.992073	0.605484	0.559222	0.36784	0.864578	0.761471	0.560294
86.5	1.78636	1.05237	0.786495	0.601246	0.415094	0.493903	0.903091	1.19037	1.12314	0.591156	0.68574	0.60519	1.28545	0.481561	0.698102	0.640807	1.05688	0.683332	0.636082	0.389736	0.771794	0.624797	0.566519
87.5	1.28185	0.968379	1.17015	0.702186	0.466981	0.424448	0.962636	1.30489	1.92068	0.483376	0.855331	0.579547	1.43532	0.682719	0.649112	0.620356	1.01201	0.493037	0.665235	0.560518	0.826621	0.702896	0.884019
88.5	1.20463	1.53656	1.64972	0.746072	0.745283	0.409014	1.05691	1.2868	1.82922	0.640146	0.851644	0.579547	1.60249	0.60957	0.575628	1.04983	1.11172	0.691982	0.675837	0.4598	0.906752	0.68988	1.41319
89.5	1.48777	1.28953	1.09342	0.855789	0.698113	0.540207	0.873319	1.25667	1.74508	0.60422	0.906946	0.600062	1.49873	0.920451	0.338845	1.71791	0.802632	0.813078	0.736795	0.446663	1.0881	1.0999	0.915147
