# Supplementary material for: KLC4 shapes axon arbors during development and mediates adult behavior
Source: eLife. 2022 Oct 12;11:e74270. doi: 10.7554/eLife.74270 (PMC9596160; doi:10.7554/eLife.74270)
Supplement: Figure 5—source data 1. [file elife-74270-fig5-data1.xlsx]

## Sheet: rose plot for combined wt data
theta	r
0	10
0.1745	10
0.349	2
0.5235	0
0.698	0
0.8725	0
1.047	0
1.2215	0
1.396	0
1.5705	0
1.745	0
1.9195	0
2.094	0
2.2685	0
2.443	0
2.6175	0
2.792	5
2.9665	31
3.141	44
3.3155	72
3.49	90
3.6645	107
3.839	120
4.0135	115
4.188	108
4.3625	115
4.537	100
4.7115	103
4.886	112
5.0605	120
5.235	105
5.4095	87
5.584	76
5.7585	61
5.933	41
6.1075	16
