# Supplementary material for: KLC4 shapes axon arbors during development and mediates adult behavior
Source: eLife. 2022 Oct 12;11:e74270. doi: 10.7554/eLife.74270 (PMC9596160; doi:10.7554/eLife.74270)
Supplement: Figure 5—source data 2. [file elife-74270-fig5-data2.xlsx]

## Sheet: rose plot for klc4 uw314
theta	r
0	13
0.1745	0
0.349	0
0.5235	0
0.698	0
0.8725	0
1.047	0
1.2215	0
1.396	0
1.5705	0
1.745	0
1.9195	0
2.094	0
2.2685	6
2.443	10
2.6175	17
2.792	40
2.9665	40
3.141	55
3.3155	65
3.49	68
3.6645	71
3.839	61
4.0135	50
4.188	55
4.3625	73
4.537	88
4.7115	110
4.886	112
5.0605	112
5.235	127
5.4095	108
5.584	80
5.7585	42
5.933	29
6.1075	20
