# Supplementary material for: KLC4 shapes axon arbors during development and mediates adult behavior
Source: eLife. 2022 Oct 12;11:e74270. doi: 10.7554/eLife.74270 (PMC9596160; doi:10.7554/eLife.74270)
Supplement: Figure 5—source data 3. — If a branch retracted or the 75-min time point fell out of recorded range, no data was recorded for the 75-min point. [file elife-74270-fig5-data3.xlsx]

## Sheet: Sheet1
KLC4+/+ (15min)	KLC4-/- (15min)	KLC4+/+ (75min)	KLC4-/- (75min)
89.861	93.59	95.618	73.22
133.152	46.219	119.784	13.898
102.756	93.849	93.18	71.56
103.85	88.264	83.981	60.16
102.659	68.02	136.332	108.138
84.605	77.512	71.63	21.782
99.349	91.332	84.47	45
164.311	37.99	99.913	20.25
81.5	101.174	68.902	81.87
99.082	86.969	126.552	27.637
116.15	42.357	38.063	54.099
105.843	87.02	89.272	65.89
97.804	84.5	66.615	28.74
84.319	86.53	63.078	69.784
88.059	65.28	82.817	66.731
77.83	57.658	118.28	92.862
74.055	41.689	91.943	92.767
69.959	84.791	106.516	89.63
137.223	26.565	103.046
96.052	86.186	53.13
118.46	95.528	132.651
117.458	92.38	88.033
53.424	64.938	77.9
116.476	69.075	77.32
77.47	93.066	95.96
73.74	107.103
76.479	99.926
65.175	100
92.511	110.738
111.8	116.799
79.172	93.691
95.69	86.96
88.481	84.791
73.74	26.565
103.94	86.186
96.53	95.528
88.15
