# Supplementary material for: KLC4 shapes axon arbors during development and mediates adult behavior
Source: eLife. 2022 Oct 12;11:e74270. doi: 10.7554/eLife.74270 (PMC9596160; doi:10.7554/eLife.74270)
Supplement: Figure 6—source data 1. [file elife-74270-fig6-data1.xlsx]

## Sheet: uw314 fasc
Neuron	SF #	NSF #	All #	Total Neurons
070919_H1N1	2	0	2	10
070919_H1N2	0	0	0	10
070919_H1N3	0	0	0	10
070919_H1N4	0	0	0	10
070919_H1N5	0	0	0	10
070919_H1N6	0	0	0	10
070919_H1N7	0	0	0	10
070919_H1N8	0	0	0	10
070919_H1N9	0	0	0	10
070919_H1N10	0	0	0	10
071819_H1N1	2	0	2	7
071819_H1N2	0	2	2	7
071819_H1N3	2	0	2	7
071819_H1N4	1	1	2	7
071819_H1N5	0	0	0	7
071819_H1N6	0	0	0	7
071819_H1N7	0	0	0	7
073019_H1N1	1	0	1	5
073019_H1N2	0	0	0	5
073019_H1N3	0	0	0	5
073019_H1N4	0	0	0	5
073019_H1N5	0	0	0	5
073019_H1N7	0	0	0	5
073019_H4N1	0	0	0	2
073019_H4N2	0	0	0	2
073119_H1N1	1	1	2	3
073119_H1N2	1	0	1	3
073119_H1N3	0	0	0	3
081619_H1N1	0	1	1	3
081619_H1N2	0	1	1	3
081619_H1N3	0	0	0	3
073119_H2N1	0	3	3	6
073119_H2N2	0	0	0	6
073119_H2N3	0	0	0	6
073119_H2N4	0	0	0	6
073119_H2N5	0	0	0	6
073119_H2N6	0	0	0	6

## Sheet: wt fasc
Neuron	SF #	NSF #	All #	Total Neurons
050219_WTN1	1	0	1	6
050219_WTN2	0	0	0	6
050219_WTN3	0	0	0	6
050219_WTN4	0	0	0	6
050219_WTN5	0	0	0	6
050219_WTN6	0	0	0	6
073119_WTN1	0	0	0	12
073119_WTN2	0	0	0	12
073119_WTN3	0	0	0	12
073119_WTN4	0	0	0	12
073119_WTN5	0	0	0	12
073119_WTN6	0	0	0	12
073119_WTN7	0	0	0	12
073119_WTN8	0	0	0	12
073119_WTN9	0	0	0	12
073119_WTN10	0	0	0	12
073119_WTN11	0	0	0	12
073119_WTN12	0	0	0	12
051019_WTN1	1	0	1	7
051019_WTN2	0	1	1	7
051019_WTN3	0	0	0	7
051019_WTN4	0	0	0	7
051019_WTN5	0	0	0	7
051019_WTN6	0	0	0	7
051019_WTN7	0	0	0	7
032121_WTN1	0	0	0	10
032121_WTN2	0	0	0	10
032121_WTN3	0	0	0	10
032121_WTN4	0	0	0	10
032121_WTN5	0	0	0	10
032121_WTN6	0	0	0	10
032121_WTN7	0	0	0	10
032121_WTN8	0	0	0	10
032121_WTN9	0	0	0	10
032121_WTN10	0	0	0	10
