# Supplementary material for: KLC4 shapes axon arbors during development and mediates adult behavior
Source: eLife. 2022 Oct 12;11:e74270. doi: 10.7554/eLife.74270 (PMC9596160; doi:10.7554/eLife.74270)
Supplement: Figure 6—source data 2. [file elife-74270-fig6-data2.xlsx]

## Sheet: Sheet1
WT SF	KLC4-/- SF	WT NSF	KLC4-/- NSF		KLC4+/+	KLC4-/-
62.388	28.931	1.217	7.498		62.388	28.931
1.814	48.949		17.352		1.814	48.949
	57.741		18.353		1.217	57.741
	52.4		30.55			52.4
	22.203		9.912			22.203
	8.636		60.507			8.636
	27.579		18.19			27.579
	20.212		26.547			20.212
	54.383		49.87			54.383
	42.754					42.754
						7.498
						17.352
						18.353
						30.55
						9.912
						60.507
						18.19
						26.547
						49.87
