# Supplementary material for: KLC4 shapes axon arbors during development and mediates adult behavior
Source: eLife. 2022 Oct 12;11:e74270. doi: 10.7554/eLife.74270 (PMC9596160; doi:10.7554/eLife.74270)
Supplement: Figure 7—source data 1. [file elife-74270-fig7-data1.xlsx]

## Sheet: wt cousins
61919
embryo	#neurons	#crossovers		%
e1_01	19	0		0
e2_01	23	0		0
e3_01	18	0		0
e4_01	22	0		0
e5_01	19	0		0
e6_01	18	0		0
e7_01	15	0		0
e8_01	13	0		0
e9_01	19	0		0
e10_01	21	0		0
e11_01	16	0		0
e12_01	16	0		0
111418
embryo	#neurons	#crossovers		%
e2	42	0		0
e3	50	0		0
e4	46	0		0
e5	38	1		2.63158
e6	42	0		0
e7	51	0		0
e8	40	2		5
e9	42	0		0
e10	38	1		2.63158

## Sheet: uw314
111418
embryo	#neurons	#crossovers		%
e2	38	0		0
e3	38	2		5.26316
e4	26	1		3.84615
e5	45	2		4.44444
e6	45	1		2.22222
e7	34	2		5.88235
e8_1	45	2		4.44444
e8_2	48	1		2.08333
e10	45	1		2.22222
e11	52	0		0
e9_02	27	0		0
121918_1
embryo	#neurons	#crossovers		%
e1_01	30	0		0
e1_02	32	0		0
e2_02	25	2		8
e3	31	2		6.45161
e4	27	0		0
e5_01	35	0		0
e6_02	22	1		4.54545
121918_2
e1_01	18	2		11.1111
e3_01	32	0		0
e4_01	19	1		5.26316
e3_02	31	1		3.22581
e5_01	15	1		6.66667
e5_02	11	0		0
e6_01	17	2		11.7647
e8_01	12	0		0
e8_02	13	2		15.3846
e8_03	14	1		7.14286
e8_04	20	0		0
e9_01	14	1		7.14286
e10_01	30	1		3.33333
e11_01	17	0		0
e11_02	16	2		12.5
e12_01	11	0		0
12_02	13	1		7.69231
e14_01	17	0		0
e15_01	21	2		9.52381
e15_02	21	2		9.52381
e16_01	35	0		0
e17_01	21	1		4.7619
e18_01	23	0		0
e19_01	30	2		6.66667
71019
embryo	#neurons	#crossovers		%
e1_01	16	0		0
e2_01	9	0		0
e3_01	13	0		0
e3_02	22	0		0
e4_01	12	1		8.33333
e5_01	9	0		0
e6_01	20	1		5
e7_01	18	0		0
e8_01	17	1		5.88235
e8_02	13	0		0
e9_01	17	0		0
e10_01	16	0		0
e11_01	13	0		0
e11_02	15	0		0
e12_01	12	0		0
e12_02	24	2		8.33333
61919
embryo	#neurons	#crossovers		%
e14_01	17	0		0
e15_01	22	0		0
e15_02	17	0		0
e16_01	22	0		0
e16_02	24	0		0
e17_01	16	0		0
e17_02	16	0		0
	1496

## Sheet: DMSO
122018
embryo	#neurons	#crossovers		%
e1	24	0		0
e2	26	0		0
e3	22	0		0
e4	24	0		0
e5	21	2		9.52381
e6_2	19	1		5.26316
e7_1	27	1		3.7037
e8	28	1		3.57143
e9	21	1		4.7619
112918
embryo	#neurons	#crossovers		%
e1	44	0		0
e2	35	1		2.85714
e3	29	0		0
e4	33	0		0
e5	41	0		0
e6	35	0		0

## Sheet: Kinesore
122018
embryo	#neurons	#crossovers		%
e1	16	1		6.25
e2	17	1		5.88235
e3	24	2		8.33333
e3	18	1		5.55556
e4	26	4		15.3846
e5	29	0		0
e6	27	4		14.8148
e7_1	20	5		25
e7_2	18	2		11.1111
e8	22	0		0
e9	23	0		0
e10	19	0		0
52618
embryo	#neurons	#crossovers		%
e1_001	7	0		0
e4_001	11	0		0
e5_01	12	2		16.6667
e5_02	13	1		7.69231
e5_03	10	0		0
111618
embryo	#neurons	#crossovers
e10_01	36	3		8.33333
e2_01	28	2		7.14286
e3_01	32	2		6.25
e4_01	16	1		6.25
e5_01	14	2		14.2857
e6_01	44	1		2.27273
e6_02	28	6		21.4286
e7_01	44	0		0
e8_01	41	0		0
