# Supplementary material for: KLC4 shapes axon arbors during development and mediates adult behavior
Source: eLife. 2022 Oct 12;11:e74270. doi: 10.7554/eLife.74270 (PMC9596160; doi:10.7554/eLife.74270)
Supplement: Figure 8—source data 1. [file elife-74270-fig8-data1.xlsx]

## Sheet: Fig8 Souce Data 1
	WT	ID	# Antero	# Retro	% Antero		Klc4	ID	# Antero	# Retro	% Antero
		20191003-006	19	19	50			20200626-008	48	60	44.4444
		20191003-007	16	16	50			20200626-010	14	9	60.8696
		20191003-008	24	20	54.5455			20200626-013	16	18	47.0588
		20191220-003	32	15	68.0851			20200704-003	51	48	51.5152
		20191220-006	84	73	53.5032			20201107-004	29	23	55.7692
		20191220-008	27	22	55.102			20211215-003	34	13	72.3404
		20200110-002	22	18	55			20211215-004	2	4	33.3333
		20200110-004	84	46	64.6154			20211224-001	4	4	50
		20211215-002	23	9	71.875			20211224-007	14	10	58.3333
		20211215-003	4	4	50			20211224-008	5	6	45.4545
		20211215-004	11	7	61.1111			20220121-002	8	6	57.1429
		20211224-001	13	8	61.9048			20220121-004	6	8	42.8571
		20220609-001	25	24	51.0204			20220121-005	8	15	34.7826
		20220609-002	13	15	46.4286			20220121-006	11	19	36.6667
		20220609-003	14	9	60.8696	56.9374		20220609-001	20	20	50	49.3712
			411	305	716				270	263	533
			57.4022						50.6567
