# Supplementary material for: KLC4 shapes axon arbors during development and mediates adult behavior
Source: eLife. 2022 Oct 12;11:e74270. doi: 10.7554/eLife.74270 (PMC9596160; doi:10.7554/eLife.74270)
Supplement: Figure 8—source data 2. [file elife-74270-fig8-data2.xlsx]

## Sheet: Sheet1
WT central avg	Klc4-/- central avg	WT periph avg	Klc4-/- periph avg	WT central longest	Klc4-/- central longest	WT periph longest	Klc4-/- periph longest
5.34468	6.89464	5.72416	4.24902	6.25328	8.17737	9.78077	4.48954
6.25328	7.78542	6.44569	5.20216	8.81873	20.3632	13.3083	7.85669
4.40937	5.66537	6.45371	5.97841	4.81022	8.17737	15.072	7.37567
7.03717	6.3869	6.53349	4.89039	9.94111	11.0635	21	5.45158
8.97907	4.75677	5.33368	4.75677	14.7513	5.61192	12.3462	7.37567
9.20355	5.79517	5.78562	5.91478	18.1185	7.53601	9.62043	9.94111
9.29975	10.4061	4.54298		9.29975	24.2114	5.29124
6.76637	4.26048	5.0939		11.2238	4.64988	7.69635
5.31414	7.47187	6.07203	6.45607	7.05498	12.0255	12.9876	10.9032
7.51997		5.73217	7.93686	17.7978		7.05498	9.94111
8.33771		5.56819	5.652	15.072		12.0255	8.01703
		6.90698	5.5203			13.1479	8.01703
			6.44569				8.49805
