# Supplementary material for: KLC4 shapes axon arbors during development and mediates adult behavior
Source: eLife. 2022 Oct 12;11:e74270. doi: 10.7554/eLife.74270 (PMC9596160; doi:10.7554/eLife.74270)
Supplement: Figure 8—source data 3. [file elife-74270-fig8-data3.xlsx]

## Sheet: Sheet1
WT central retro	Klc4-/- central retro	WT periph retro	Klc4-/- periph retro	WT central antero	Klc4-/- central antero	WT periph antero	Klc4-/- periph antero
0.178616	0.742611	0.228921	0.266369	0.405707	0.284663	0.230444	0.327061
0.204576	0.415051	0.140058	0.316734	0.175657	0.381528	0.152361	0.184352
0.061793	0.363662	0.149873	0.530586	0.0981823	0.250323	0.193809	0.323083
0.126963	0.507973	0.353497	0.243028	0.168488	0.334222	0.36347	0.324038
0.0771658	0.334899	0.312677	0.294076	0.101655	0.282934	0.283129	0.325342
0.356178	0.429539	0.207206	0.328823	0.343198	0.239494	0.218883	0.393395
0.142717	0.369669	0.200631		0.14336	0.524705	0.220216
0.369846	0.384617	0.190384		0.352074	0.268564	0.193203
0.412914	0.220592	0.181105	0.251841	0.501908	0.147029	0.207455	0.255745
0.605336		0.27185	0.33149	0.286557		0.211654	0.128745
0.122066		0.150467	0.181168	0.210304		0.142742	0.158888
		0.132176	0.171482			0.206756	0.194057
			0.171839				0.128634
