# Supplementary material for: KLC4 shapes axon arbors during development and mediates adult behavior
Source: eLife. 2022 Oct 12;11:e74270. doi: 10.7554/eLife.74270 (PMC9596160; doi:10.7554/eLife.74270)
Supplement: Figure 9—source data 1. [file elife-74270-fig9-data1.xlsx]

## Sheet: central wt
	Total time in seconds	Total Distance in Microns	average speed (microns/sec)	average speed (microns/min)
Average Ant	144.373	15.406	0.110218	6.61309
Average Ant	150.577	10.1848	0.0682431	4.09458
Average Ant	112.9	6.61332	0.0584904	3.50942
Average Ant	62.4717	6.14172	0.102509	6.15055
Average Ant	82.4301	10.5481	0.130713	7.84276
Average Ant	194.96	16.4713	0.0864488	5.18693
Average Ant	93.359	7.9689	0.0910851	5.4651
Average Ant	115.628	8.47511	0.0783253	4.69952
Average Ret	183.817	11.0154	0.0583266	3.4996
Average Ret	103.045	6.4849	0.0638153	3.82892
Average Ret	35.0955	3.44731	0.099438	5.96628
Average Ret	48.1703	2.67233	0.0684477	4.10686
Average Ret	192.897	15.6332	0.0802175	4.81305
Average Ret	77.4105	7.16185	0.0869249	5.21549

## Sheet: peripheral wt
	Total time in seconds	Total Distance in Microns	average speed (microns/sec)	average speed (microns/min)
Average Ant	104.509	9.84946	0.0945873	5.67524
Average Ant	49.0834	5.30904	0.111848	6.71087
Average Ant	71.7493	9.56027	0.137915	8.27493
Average Ant	109.734	11.6336	0.109075	6.54451
Average Ant	170.836	16.7288	0.0928358	5.57015
Average Ant	100.4	10.0613	0.105876	6.35256
Average Ant	139.636	10.0613	0.0810619	4.86372
Average Ant	134.899	11.0955	0.0845664	5.07398
Average Ant	139.168	12.4264	0.0950767	5.7046
Average Ant	72.6333	6.37924	0.0953569	5.72141
Average Ant	119.933	9.53551	0.0848451	5.09071
Average Ant	112.701	9.8692	0.0890926	5.34556
Average Ant	80.1089	6.81476	0.0952595	5.71557
Average Ant	104.314	10.0955	0.114105	6.8463
Average Ant	118.052	15.4639	0.148807	8.92841
Average Ant	86.4435	10.9432	0.115067	6.90403
Average Ant	65.4875	6.54722	0.11161	6.6966
Average Ant	142.997	17.2989	0.132754	7.96526
Average Ant	92.5191	11.4242	0.131446	7.88677
Average Ant	60.0993	6.48955	0.115735	6.9441
Average Ant	90.397	11.3521	0.135891	8.15347
Average Ant	173.986	14.6711	0.0928298	5.56979
Average Ant	79.4283	10.1976	0.170255	10.2153
Average Ant	89.9347	8.85433	0.0957487	5.74492
Average Ant	86.0364	6.133	0.0765159	4.59095
Average Ant	140.27	11.5442	0.0818543	4.91126
Average Ret	97.0726	8.09717	0.0890834	5.345
Average Ret	39.3918	6.25326	0.153861	9.23165
Average Ret	53.4603	5.64397	0.105785	6.3471
Average Ret	71.608	7.53598	0.105239	6.31436
Average Ret	39.3844	3.36714	0.0854943	5.12966
Average Ret	62.6114	6.30671	0.106859	6.41155
Average Ret	37.5669	3.60765	0.100892	6.05353
Average Ret	77.4105	5.34467	0.0707035	4.24221
Average Ret	86.5176	4.97054	0.0598502	3.59101
Average Ret	38.7053	2.56544	0.0891563	5.34938
Average Ret	54.4856	7.05496	0.173397	10.4038
Average Ret	22.0038	4.0085	0.182173	10.9304
Average Ret	34.5774	3.76799	0.110518	6.6311
Average Ret	58.1529	5.13088	0.0850141	5.10085
Average Ret	37.686	4.20091	0.118611	7.11669
Average Ret	22.6116	3.26025	0.19461	11.6766
Average Ret	38.4397	4.32918	0.117106	7.02634
Average Ret	109.687	8.49802	0.0774754	4.64852
Average Ret	30.2584	2.56544	0.0847844	5.08706
Average Ret	59.15	4.47671	0.0798685	4.79211
Average Ret	43.94	2.42055	0.062519	3.75114

## Sheet: peripheral uw314
	Total time in seconds	Total Distance in Microns	average speed (microns/sec)	average speed (microns/min)
Average Ant	78.0527	5.98381	0.0993458	5.96075
Average Ant	85.4141	7.34057	0.0969202	5.81521
Average Ant	54.7937	6.66301	0.1275	7.65002
Average Ant	82.7069	9.72729	0.148986	8.93918
Average Ant	63.2697	5.97267	0.0974864	5.84918
Average Ant	101.232	8.36774	0.0903703	5.42222
Average Ant	97.1805	15.6961	0.16932	10.1592
Average Ant	93.5161	13.0184	0.141375	8.48249
Average Ant	71.8042	11.5044	0.166352	9.98114
Average Ant	50.5176	7.15116	0.141549	8.49296
Average Ant	64.1655	8.11721	0.127941	7.67649
Average Ant	47.53	5.98603	0.127706	7.66234
Average Ant	59.4833	6.92134	0.121044	7.26267
Average Ant	121.588	13.3149	0.121316	7.27898
Average Ant	93.0142	13.5487	0.149868	8.99209
Average Ant	65.098	9.25964	0.147213	8.8328
Average Ant	67.6684	8.22188	0.127095	7.62569
Average Ant	109.948	12.5284	0.114275	6.8565
Average Ant	72.9724	8.21378	0.124287	7.45722
Average Ant	73.7223	10.7784	0.168995	10.1397
Average Ant	85.5259	11.2384	0.132591	7.95544
Average Ant	93.7729	13.9615	0.151249	9.07495
Average Ant	119.308	12.5523	0.10419	6.25143
Average Ant	73.2822	9.44403	0.145025	8.70148
Average Ant	78.1237	9.78074	0.141832	8.50992
Average Ant	96.1316	10.5578	0.109583	6.57499
Average Ant	72.2634	7.53598	0.105315	6.31891
Average Ant	62.6878	6.94807	0.120517	7.23104
Average Ant	58.5802	7.89675	0.137512	8.25072
Average Ant	69.3321	8.20025	0.123668	7.42009
Average Ant	43.7298	5.37139	0.139557	8.37343
Average Ant	83.6767	11.1851	0.134464	8.06782
Average Ant	64.8819	8.14765	0.131799	7.90794
Average Ant	75.4851	8.78787	0.1181	7.08602
Average Ant	76.9728	11.032	0.14892	8.93518
Average Ant	56.6371	10.0346	0.193495	11.6097
Average Ant	54.7308	5.37611	0.0971416	5.8285
Average Ant	127.729	8.27755	0.0683832	4.10299
Average Ret	51.0983	4.24011	0.0927407	5.56444
Average Ret	60.3257	4.83311	0.0837339	5.02403
Average Ret	36.2507	3.92301	0.141169	8.47013
Average Ret	30.3695	4.89037	0.161029	9.66175
Average Ret
Average Ret	34.708	4.08867	0.111489	6.68931
Average Ret	72.409	9.67766	0.145984	8.75903
Average Ret	40.0155	6.33343	0.152514	9.15087
Average Ret	47.2584	6.09292	0.158823	9.52938
Average Ret	44.116	5.05071	0.114245	6.85468
Average Ret	51.648	6.6942	0.12519	7.51138
Average Ret	40.888	3.92833	0.0994844	5.96906
Average Ret	53.8	6.4136	0.125861	7.55164
Average Ret	49.2569	3.91942	0.0881969	5.29182
Average Ret	40.7123	3.09991	0.0891928	5.35157
Average Ret	19.806	3.52748	0.178102	10.6861
Average Ret	39.612	4.8102	0.129627	7.77764
Average Ret	47.8645	5.6119	0.118237	7.09424
Average Ret	37.4105	3.87488	0.107042	6.42252
Average Ret	33.3661	3.52748	0.130499	7.82993
Average Ret	85.9429	8.87215	0.100785	6.04708
Average Ret	36.3994	3.92833	0.110635	6.63808
Average Ret	44.652	3.34423	0.0914425	5.48655
Average Ret	47.2481	4.97054	0.105201	6.31206
Average Ret	38.5253	4.36125	0.127176	7.63055
Average Ret	14.5379	2.24476	0.154408	9.26447
Average Ret	59.344	4.56969	0.0913725	5.48235

## Sheet: central uw314
	Total time in seconds	Total Distance in Microns	average speed (microns/sec)	average speed (microns/min)
Average Ant	60.2138	7.90476	0.141318	8.4791
Average Ant	92.8498	11.3987	0.12223	7.33377
Average Ant	132.59	27.6076	0.223226	13.3936
Average Ant	128.522	9.88763	0.0786454	4.71872
Average Ant	137.242	13.4151	0.101368	6.08209
Average Ant	108.795	27.4563	0.271524	16.2914
Average Ant	162.849	16.6754	0.104845	6.29068
Average Ant	51.1866	6.67415	0.146147	8.76884
Average Ant	71.2821	16.4978	0.247772	14.8663
Average Ant	79.6787	9.39839	0.128941	7.73647
Average Ant	74.5066	6.97479	0.103735	6.22412
Average Ant	73.8709	6.40024	0.0894352	5.36611
Average Ant	160.723	10.9031	0.0729865	4.37919
Average Ret	114.33	12.266	0.108016	6.48093
Average Ret	72.409	6.4136	0.0859583	5.1575
Average Ret	65.184	14.9116	0.228762	13.7257
Average Ret	77.4	6.89462	0.0890778	5.34467
Average Ret	113.233	8.07045	0.0778445	4.67067
Average Ret	42.284	9.01111	0.225087	13.5052
Average Ret	58.3177	8.71181	0.149499	8.96996
Average Ret	40.191	5.77224	0.142128	8.5277
Average Ret	37.4105	7.13513	0.196457	11.7874
Average Ret	44.8251	3.31369	0.0775381	4.65229
Average Ret	34.787	4.3979	0.129498	7.76991

## Sheet: ret comet %
KLC +/+ Central	KLC -/- Central	KLC+/+ Peripheral	KLC-/- Peripheral
0	16.6667	22.2222	33.3333
13.6364	15.3846	0	30.4348
16.6667	8.33333	20	45.4545
8	10	35.7143	4.54545
17.6471	20	6.66667	0
15.3846	19.2308	4	20
22.2222	55.5556	0	33.3333
	11.1111	16.6667	7.14286
	17.6471	20	38.4615
	18.75	0	0
	43.75	15	0
	0	9.375	0
	0	18.75	0
	11.1111	10	14.2857
	21.4286	10	18.1818
		33.3333	11.1111
		25	18.1818
		21.7391	15.0943
		13.0435	0
		20.8333	25
		0	8.33333
		33.3333	0
		16.6667	0
		0	28.5714
		21.4286	14.2857
		13.3333	10.3448
			0
			40
			0
			30
			0
			17.1429
			20.5882
			3.7037
			8.19672
			0
			5.55556
			15.625
			16.129
			10.7143
			0
			36.3636
			0
			18.1818
			24.1379
			0
			0

## Sheet: comet frequency
KLC4 +/+ Central Ant	KLC4+/+ Central Ret	KLC4 -/- Central Ant	KLC4 -/- Central Ret	KLC+/+ Peripheral Ant	KLC+/+ Peripheral Ret	KLC4-/- Peripheral Ant	KLC4-/- Peripheral Ret
0.0313158	0	0.0629651	0.012593	0.0651529	0.0186151	0.0722374	0.0361187
0.0885257	0.0177051	0.0710843	0.0129244	0.212957	0	0.105653	0.0462233
0.111367	0.0185612	0.0200521	0.00182291	0.129852	0.0324629	0.0853354	0.0711128
0.149497	0.0129997	0.0443019	0.00492244	0.0861786	0.047877	0.101415	0.00482931
0.113341	0.0242874	0.0562111	0.0140528	0.0419385	0.00299561	0.174017	0
0.0412465	0.0117847	0.0445019	0.0105957	0.0954039	0.00397516	0.0802638	0.0200659
0.139268	0	0.0129381	0.0258761	0.038017	0	0.0766104	0.0383052
0.020242	0.00449823	0.21139	0.0264237	0.0379231	0.00758462	0.114012	0.00877014
		0.0780781	0.016731	0.0582579	0.0145645	0.0480391	0.0300245
		0.119546	0.0275875	0.095998	0	0.0647006	0
		0.0969349	0.084818	0.0544784	0.00961384	0.0816665	0
		0.073861	0	0.109941	0.010307	0.0599184	0
		0.0555652	0	0.0521894	0.0120437	0.0661725	0.0140528
		0.0674834	0	0.0843834	0.00937593	0.106537	0.0177562
		0.0522388	0.0142469	0.110103	0.00937593	0.0752933	0.0167319
				0.0240554	0.0120277	0.146536	0.018317
				0.0374055	0.0124685	0.170228	0.0378285
				0.0209831	0.00699438	0.128035	0.026189
				0.0642849	0.00964274	0.20582	0
				0.22736	0.0598315	0.0486102	0.0162034
				0.027262	0	0.0636562	0.00578692
				0.00640524	0.00320262	0.0978415	0
				0.0434039	0.00868079	0.0635173	0
				0.034791	0	0.0727075	0.029083
				0.0378459	0.0103216	0.087249	0.0145415
				0.0572089	0.00880137	0.181458	0.0209374
						0.132913	0
						0.0475118	0.0316746
						0.128344	0
						0.0655087	0.0280752
						0.159395	0
						0.118622	0.0245425
						0.2207	0.0572185
						0.210852	0.00810971
						0.168644	0.0150575
						0.0767652	0
						0.162119	0.00953642
						0.071782	0.00897275
						0.0908459	0.0168233
						0.0612121	0.0117716
						0.120795	0.0144954
						0.0835715	0
						0.0639286	0.0365306
						0.105199	0
						0.160598	0.0356885
						0.094759	0.0301506
						0.194304	0
						0.0625143	0
