# Supplementary material for: KLC4 shapes axon arbors during development and mediates adult behavior
Source: eLife. 2022 Oct 12;11:e74270. doi: 10.7554/eLife.74270 (PMC9596160; doi:10.7554/eLife.74270)
Supplement: Figure 10—source data 1. [file elife-74270-fig10-data1.csv]

WT	Klc4-/-
0.038754004	0.042810162
0.046530639	0.055859316
0.12181073	0.06777854
0.049676954	0.017084653
0.056123745	0.060931848
0.046343979	0.045814983
0.061867656	0.062835149
0.053370993	0.088826862
0.054009239	0.013143666
0.062537525	0.040191096
0.039920161	0.093108206
0.045099448	0.017727518
0.03522125	0.065136624
0.092453346	0.05493741
0.033757827	0.055068349
0.064310505	0.03579941
0.058253947	0.039564431
0.104654765	0.082545316
0.045536373	0.061537425
0.036734935	0.040898321
0.034606789	0.060628083
0.15260892	0.081593905
	0.060184996
	0.144070639
	0.039211378
