# Supplementary material for: KLC4 shapes axon arbors during development and mediates adult behavior
Source: eLife. 2022 Oct 12;11:e74270. doi: 10.7554/eLife.74270 (PMC9596160; doi:10.7554/eLife.74270)
Supplement: Figure 10—source data 2. [file elife-74270-fig10-data2.csv]

WT	Klc4
100	46.1538462
71.4285714	14.2857143
60	33.3333333
62.5	27.2727273
61.5384615	42.8571429
50	50
50	42.8571429
71.4285714	40
50	20
22.2	33.3
66.7	11.1
55.6	66.7
66.7	30.8
50	16.7
46.7	42.9
	16.7
