# Supplementary material for: KLC4 shapes axon arbors during development and mediates adult behavior
Source: eLife. 2022 Oct 12;11:e74270. doi: 10.7554/eLife.74270 (PMC9596160; doi:10.7554/eLife.74270)
Supplement: Figure 11—source data 1. [file elife-74270-fig11-data1.csv]

klc4+/+	klc4-/-
2.22	1.18
1.82	0.96
2.8	0*
1.44	0*
0.48	2.36
0*	1.32
0.38	1.14
0.78	1.84
0*	6.44
0.24	0.9
0*	0.92
2.14	1
0.16	3.18
0.74	0.32
0.34	0.38
0*	3.34
0*	2.26
0.28	0*
0.34	0*
0.7	1.6
1.36	0*
0.58	0*
0.38	1.02
0.84	0*
0*	2.52
0*	0.3
0.58	0*
0.74	1.46
0*	1.28
0.3	0*
1.54	1.16
0*	0*
1.3	0*
0*	2.7
0*	1.56
0*	2.22
0.5	0*
0.44	0.36
0.54	1.98
3.58	1.76
2.14	2.4
1.4	1.66
0.98	0.68
1.64	2.32
0.38	1.52
0.6	0*
1.4	0*
1.02	1.88
0.58	1.26
0.36	0*
0.38	0*
0*	2.52
0*	0*
0.24	1.26
0*	0.44
