# Supplementary material for: KLC4 shapes axon arbors during development and mediates adult behavior
Source: eLife. 2022 Oct 12;11:e74270. doi: 10.7554/eLife.74270 (PMC9596160; doi:10.7554/eLife.74270)
Supplement: Figure 11—source data 2. [file elife-74270-fig11-data2.csv]

klc4+/+	klc4-/-
3	3
3	2
3	0*
1	0*
1	5
0*	2
1	2
3	3
0*	8
1	2
0*	2
2	2
1	4
1	1
1	1
0*	4
0*	3
1	0*
1	0*
1	2
2	0*
1	0*
1	2
1	0*
0*	4
0*	1
1	0*
1	3
0*	1
1	0*
3	2
0*	0*
2	0*
0*	4
0*	2
0*	4
1	0*
1	1
1	4
3	3
2	2
1	1
1	1
2	3
1	2
1	0*
3	0*
2	1
1	1
1	0*
1	0*
0*	2
0*	0*
1	1
0*	1
