# Supplementary material for: KLC4 shapes axon arbors during development and mediates adult behavior
Source: eLife. 2022 Oct 12;11:e74270. doi: 10.7554/eLife.74270 (PMC9596160; doi:10.7554/eLife.74270)
Supplement: Figure 11—source data 3. [file elife-74270-fig11-data3.xlsx]

## Sheet: Percent Explored Upper Zone
Percent Explored Upper Zone
WT	uw314
90.9	18.182
100	40
76.923	0
