# Supplementary material for: KLC4 shapes axon arbors during development and mediates adult behavior
Source: eLife. 2022 Oct 12;11:e74270. doi: 10.7554/eLife.74270 (PMC9596160; doi:10.7554/eLife.74270)
Supplement: Figure 11—source data 4. — Only individuals that crossed into the upper zone are represented in this dataset. [file elife-74270-fig11-data4.xlsx]

## Sheet: Time to Explore Upper Zone
KLC4 +/+	KLC4 -/-
139	85.47
124.13	91.42
9.4	135.59
130.34	85.4
101.64	90.44
139.86	134.4
104.37	71.26
164.92	111.37
104.3
122.85
51.87
89.6
115.78
121.24
88.62
123.9
84.35
154.56
92.68
143.92
120.61
59.22
71.47
53.48
