# Supplementary material for: KLC4 shapes axon arbors during development and mediates adult behavior
Source: eLife. 2022 Oct 12;11:e74270. doi: 10.7554/eLife.74270 (PMC9596160; doi:10.7554/eLife.74270)
Supplement: Figure 11—source data 5. [file elife-74270-fig11-data5.xlsx]

## Sheet: Time Spent in Upper Region
KLC4 +/+	KLC4 -/-
6.46	33.53
21.67	0
43.05	26.6
22.75	0
56.91	0
31.57	3.22
0	0
19.46	0
9.17	0
0.7	30.38
2.45	0
28.42	0
12.18	27.02
13.58	3.15
2.03	0
11.62	0
5.46	0
21.63	0
0	0
0	0
1.54	0.21
24.99	0
0	0
0.14	0
19.67	3.15
18.97	0
0.84	0
12.74	0
13.86	0
18.76	0
	0
	0
	0
	0
	0
	0
	0
	0
	0
