# Supplementary material for: KLC4 shapes axon arbors during development and mediates adult behavior
Source: eLife. 2022 Oct 12;11:e74270. doi: 10.7554/eLife.74270 (PMC9596160; doi:10.7554/eLife.74270)
Supplement: Figure 11—source data 6. [file elife-74270-fig11-data6.xlsx]

## Sheet: Percent Froze
KLC4 +/+	KLC4 -/-
0	92.3
0	26.667
9.09	10
