# Supplementary material for: KLC4 shapes axon arbors during development and mediates adult behavior
Source: eLife. 2022 Oct 12;11:e74270. doi: 10.7554/eLife.74270 (PMC9596160; doi:10.7554/eLife.74270)
Supplement: Figure 11—source data 7. [file elife-74270-fig11-data7.xlsx]

## Sheet: Time Frozen
KLC4 +/+	KLC4 -/-
0	0
0	0
0	0
0	192.29
0	73.85
0	0
0	0
0	0
42.42	0
0	0
0	185.36
0	74.83
0	0
0	0
0	0
0	0
0	0
0	0
0	0
0	145.25
0	0
0	0
0	0
0	0
0	0
0	0
0	185.92
0	0
0	3.15
0	186.53
	184.53
	79.52
	85.26
	167.79
	167.79
	190.73
	9.45
	127.132
	128.676
