# Supplementary material for: KLC4 shapes axon arbors during development and mediates adult behavior
Source: eLife. 2022 Oct 12;11:e74270. doi: 10.7554/eLife.74270 (PMC9596160; doi:10.7554/eLife.74270)
Supplement: Figure 12—source data 1. [file elife-74270-fig12-data1.csv]

klc4+/+	klc4uw314
0	33.33
0	33.33
20	0
33	50
