# Supplementary material for: KLC4 shapes axon arbors during development and mediates adult behavior
Source: eLife. 2022 Oct 12;11:e74270. doi: 10.7554/eLife.74270 (PMC9596160; doi:10.7554/eLife.74270)
Supplement: Figure 12—source data 2. [file elife-74270-fig12-data2.xlsx]

## Sheet: Percent of Fish Freezing
Exposuire #	KLC4+/+ Group 1	KLC4+/+ Group 2	KLC4+/+ Group 3	KLC4+/+ Group 4	KLC4 -/- Group 1	KLC4 -/- Group 2	KLC4 -/- Group 3	KLC4 -/- Group 4
1	16.66	33.333	0	16.66	0	33.333	33.333	50
2	0	33.333	0	0	16.66	16.66	66.66	50
3	0	33.333	16.66	16.66	33.333	33.333	16.66	66.66
4	16.66	16.66	33.333	0	33.333	66.66	16.66	50
5	0	16.66	0	0	0	66.66	66.66	66.66
6	16.66	16.66	0	0	50	50	50	50
