# Supplementary material for: KLC4 shapes axon arbors during development and mediates adult behavior
Source: eLife. 2022 Oct 12;11:e74270. doi: 10.7554/eLife.74270 (PMC9596160; doi:10.7554/eLife.74270)
Supplement: Figure 12—source data 3. [file elife-74270-fig12-data3.xlsx]

## Sheet: Time Frozen
Exposure	KLC4+/+	KLC4+/+	KLC4+/+	KLC4+/+	KLC4+/+	KLC4+/+	KLC4+/+	KLC4+/+	KLC4+/+	KLC4+/+	KLC4+/+	KLC4+/+	KLC4+/+	KLC4+/+	KLC4+/+	KLC4+/+	KLC4+/+	KLC4+/+	KLC4+/+	KLC4+/+	KLC4+/+	KLC4+/+	KLC4+/+	KLC4-/-	KLC4-/-	KLC4-/-	KLC4-/-	KLC4-/-	KLC4-/-	KLC4-/-	KLC4-/-	KLC4-/-	KLC4-/-	KLC4-/-	KLC4-/-	KLC4-/-	KLC4-/-	KLC4-/-	KLC4-/-	KLC4-/-	KLC4-/-	KLC4-/-	KLC4-/-	KLC4-/-	KLC4-/-	KLC4-/-
1	0	0	0	0	5.6	0	0	127.26	0	0	0	0	107	0	0	40	0	10	56	64	397	0	0	0	0	0	43	0	346	0	0	47	0	16	161	0	0	0	0	0	0	0	55	153	0	310
2	0	0	0	0	0	0	0	0	0	0	0	0	0	0	0	0	0	0	0	0	0	233	0	0	0	0	230	0	95	107	0	0	359	97	0	0	0	0	0	128	145.22	0	0	0	0	0
3	0	0	0	0	0	30	0	0	0	0	19	0	0	22.18	0	0	0	0	0	0	0	189.01	0	0	0	17	0	0	0	53	124	0	0	76	55	0	293.77	7	0	81.02	0	502	276	0	0	8.8
4	0	0	213	0	34	0	0	0	0	0	0	0	0	0				0	0	0	0	0	182	0	0	0	0	0	26	0	11	84	0	0	28	0	0	0	99.62	119.75	59.24	142.37	187.85	98.04	0	0
5	0	0	0	0	0	0	0	0	0	12.18	0	0	14	0	0	0	0	0	0	0	42.63	0	0	167	0	452	0	13	59	0	32	0	215	0	236	0	0	0	0	0	234.27	0	0	167.04	25.95	485.74
6	0	0	0	0	0	0	0	0	24	0	0	0	0	0	0	103.87	0	0	0	13.77	0	0	302.09	24	46	0	0	0	144	0	0	0	133	201	96	0	0	33.13	246.64	38.41	0	0	0	96.02	145.73	130.7
