# Supplementary material for: KLC4 shapes axon arbors during development and mediates adult behavior
Source: eLife. 2022 Oct 12;11:e74270. doi: 10.7554/eLife.74270 (PMC9596160; doi:10.7554/eLife.74270)
Supplement: Figure 12—source data 4. [file elife-74270-fig12-data4.xlsx]

## Sheet: Swim Velocity
Exposure	KLC4 +/+	KLC4 +/+	KLC4 +/+	KLC4 +/+	KLC4 +/+	KLC4 +/+	KLC4 +/+	KLC4 +/+	KLC4 +/+	KLC4 +/+	KLC4 +/+	KLC4 +/+	KLC4 +/+	KLC4 +/+	KLC4 +/+	KLC4 +/+	KLC4 +/+	KLC4 +/+	KLC4 +/+	KLC4 +/+	KLC4 +/+	KLC4 +/+	KLC4 +/+	KLC4-/-	KLC4-/-	KLC4-/-	KLC4-/-	KLC4-/-	KLC4-/-	KLC4-/-	KLC4-/-	KLC4-/-	KLC4-/-	KLC4-/-	KLC4-/-	KLC4-/-	KLC4-/-	KLC4-/-	KLC4-/-	KLC4-/-	KLC4-/-	KLC4-/-	KLC4-/-	KLC4-/-	KLC4-/-	KLC4-/-	KLC+/+ Mobile	KLC+/+ Mobile	KLC+/+ Mobile
1	6.18934	5.29867	5.56534	4.73467	5.51667	5.07067	3.77934	4.39067	5.95601	5.39867	5.84934	6.84134				1.94376	2.83903	2.2549	2.66131	1.77508	0.958124	2.9851	1.87753	3.44545	9.39636	6.8697	3.87667	6.12667	1.46933	4.42934	4.95	3.424	3.73067	5.91534	3.56267		2.53813	2.85302	1.99302	3.16678				1.00427	2.42286	0.743543	6.25134	5.33601	5.64201
2	5.24001	6.13467	5.76867	5.99201	6.34134	6.37601	4.518	5.53334	4.07267	4.23534	5.22801	6.27734	2.15983	2.12536	2.81363	2.20957	5.2832	5.70879	5.48203	1.0931	4.29899	2.71812	4.78227	5.39455	3.76727	2.68	5.29515	4.86667	3.16545	3.07867	4.95667	4.99267	1.498	4.91867	6.11534	1.85364	2.61855	3.39746	1.67242	3.58569	2.9107	4.12046	5.24892	4.03974	4.3321	4.03335	5.51734	6.17334	5.88067
3	6.15067	5.10467	4.51934	5.85667	4.824	4.08467	6.33801	5.39067	5.45061	5.91401	5.15401	4.87	4.93383	5.46927	5.62133	3.5378	5.49515	3.13339	5.00824	5.34795	5.62537	2.59471	5.28971	4.242	3.92734	4.76334	5.06334	4.87534	3.66134	5.06134	3.57334	3.236	4.27	3.73534	4.30934	4.54508	6.78493	1.9258	5.39638	3.71211	3.80228	1.28765	0.59853	4.13875	3.8678	3.50302	6.16201	5.23734	4.96534
4	5.44667	5.57201	3.37134	5.52001	5.50067	6.50001	5.33267	6.47534	6.13001	5.40001	4.05334	4.74734	5.18914	4.73957				6.99441	6.5877	4.22198	4.44198	3.12487	8.15231	5.96067	6.33001	4.49067	5.80134	6.15867	5.56201	5.71334	6.18734	5.33601	5.71401	6.24734	5.19334	5.10368	3.94706	4.43883	2.92147	2.93846	2.60165	2.16309	1.9004	2.92731	3.68139	4.21764	5.53601	5.58467	4.95467
5	5.93334	5.37401	4.588	5.48734	5.65534	6.78201	6.36201	5.85667	4.76734	5.14934	5.77601	4.064	3.1548	4.776	4.038	4.7454	3.79934	6.38453	4.28467	6.20934	3.93439	4.098	6.08134	2.954	5.44401	1.11267	5.01467	4.20734	5.49467	2.95534	5.18667	0.721334	2.63667	3.64334	5.46401	2.83715	3.066	3.64134	4.16467	4.306	2.544	4.058	5.26401	3.18334	5.53267	1.348	5.99401	5.39934	4.608
6	6.46601	4.90334	6.66267	4.77534	5.37001	4.926	6.01401	4.592	5.28667	5.34134	5.58867	6.32601	3.482	5.78334	5.01601	2.85867	4.804	4.86467	3.45334	5.16601	5.39734	6.19001	2.926	3.924	4.06667	4.544	3.04134	4.92134	4.596	3.8	5.37267	5.86534	4.038	3.09134	3.70534	4.046	5.58134	4.57667	2.03267	5.00401	4.282	5.22334	4.398	3.892	3.94667	2.37867	6.50201	4.93134	6.68334
[truncated: 43 more columns]
