# Supplementary material for: KLC4 shapes axon arbors during development and mediates adult behavior
Source: eLife. 2022 Oct 12;11:e74270. doi: 10.7554/eLife.74270 (PMC9596160; doi:10.7554/eLife.74270)
Supplement: Figure 12—source data 5. [file elife-74270-fig12-data5.xlsx]

## Sheet: Percent of Time in Upper Zone
Exposure	KLC4+/+	KLC4+/+	KLC4+/+	KLC4+/+	KLC4+/+	KLC4+/+	KLC4+/+	KLC4+/+	KLC4+/+	KLC4+/+	KLC4+/+	KLC4+/+	KLC4+/+	KLC4+/+	KLC4+/+	KLC4+/+	KLC4+/+	KLC4+/+	KLC4+/+	KLC4+/+	KLC4+/+	KLC4+/+	KLC4+/+	KLC4-/-	KLC4-/-	KLC4-/-	KLC4-/-	KLC4-/-	KLC4-/-	KLC4-/-	KLC4-/-	KLC4-/-	KLC4-/-	KLC4-/-	KLC4-/-	KLC4-/-	KLC4-/-	KLC4-/-	KLC4-/-	KLC4-/-	KLC4-/-	KLC4-/-	KLC4-/-	KLC4-/-	KLC4-/-	KLC4-/-
1	40.48	27.77	13.82	17.11	21.82	25.94	14.13	8.71	27.4	18.92	68.81	42.32	0.24	5.09	2.66	0.75	2.04	0	7.81	7.54				4.03	38.46	6.86	0	6.88	1.47	0.5	7.33	2.34	38.7	3.46	5.25		13.75	0.21	8.84	1.56			5.34	18.49	2.66
2	16.39	37.12	21.4	18.36	21.35	25.16	6.24	22.95	10.42	7.7	40.78	6.56	7.74	18.12	11.13	10.24	6.56	24.95	13.65	3.04	11.02	3.4	2.59	6.73	22.03	3.93	4.63	12.18	0	23.04	7.22	13.97	2.07	6.35	37.47	0.69	12.58	8.22	5.25	0	2.3	12.34	0.45	13.52	21.89	6.06
3	24.32	21.63	18.11	21.35	21.31	12.9	23.41	22.69	17.19	22.35	21.92	13	43.48	1.36	6.88	0.96	13.64	3.09	3.56	6.64	22.41	5.03	34.01	17.01	14.42	12.36	12.53	3.44	6.32	11.35	26.19	32.22	10.23	1.95	21.36	5.58	0.13	9.38	10.37	1.29	6.09	1.37	0	14.31	5.7	9.64
4	41.94	26.03	14.34	44.92	25.06	19.84	29.72	33.24	20.58	52.5	10.83	5.59	20.27	39.93				35.71	18.38	2.08	0.86	3.48	12.44	22.97	20.05	18.73	3.85	20.84	33.57	3.23	20.35	35.79	3.14	19.77	35.86	10.42	6.27	4.28	1.25	29.02	11.54	0.09	15.75	16.71	17.05	21.7
5	46.75	13.03	27.27	23.99	30.15	14.49	38.51	24.58	19.98	23.94	30.15	19.21	3.22	25.63	21.09	18.51	11.45	32.33	14.68	17.61	20.45	3.88	45.77	5.2	14.81	0	38	5.5	29.42	6.28	14.35	0	11.59	17.16	48.68	2.31	19.65	4.66	9.27	41.39	14.95	17.46	37.29	24.94	33.86	5.24
6	44.81	21.48	41.25	28.75	52.17	24.39	34.73	28.67	44.53	32.64	28.28	16.77	8.2	34.34	16.01	2.62	38.83	5.48	9.85	7.01	32.1	29.76	0.38	18.72	18.64	24.77	9.13	32.64	22.18	18.03	36.37	36.22	26.26	18.43	26.36	24.6	19.92	29.55	12.56	28.9	14.14	14.15	26.39	44.28	14.65	14.72
