# Supplementary material for: KLC4 shapes axon arbors during development and mediates adult behavior
Source: eLife. 2022 Oct 12;11:e74270. doi: 10.7554/eLife.74270 (PMC9596160; doi:10.7554/eLife.74270)
Supplement: Figure 12—source data 6. [file elife-74270-fig12-data6.xlsx]

## Sheet: Time to Enter Upper Zone
Exposure	KLC4+/+	KLC4+/+	KLC4+/+	KLC4+/+	KLC4+/+	KLC4+/+	KLC4+/+	KLC4+/+	KLC4+/+	KLC4+/+	KLC4+/+	KLC4+/+	KLC4+/+	KLC4+/+	KLC4+/+	KLC4+/+	KLC4+/+	KLC4+/+	KLC4+/+	KLC4+/+	KLC4+/+	KLC4+/+	KLC4+/+	KLC4-/-	KLC4-/-	KLC4-/-	KLC4-/-	KLC4-/-	KLC4-/-	KLC4-/-	KLC4-/-	KLC4-/-	KLC4-/-	KLC4-/-	KLC4-/-	KLC4-/-	KLC4-/-	KLC4-/-	KLC4-/-	KLC4-/-	KLC4-/-	KLC4-/-	KLC4-/-	KLC4-/-	KLC4-/-	KLC4-/-
1	36	34	38	41	73	60	29	64	78	58	15	20		217	36	278		26	254	71	48	124		103	190	53		56	65	136	55	154	43	78	168	132		59	500	80	271	374	464	165	361	68
2	37	37	163	125	12	132	53	55	172	56	41	57	169	98	37	36	82	23.08	33.43	13.01	171	259	248	86	86	186	293	98	112	175	228	193	255	179	32	43	61	41		62	196	83.04	140.77	52.88	36.65	65.52
3	31	154	46	43	107	37	39	92	42	25	52	41	34.24	112.47	51.77	180.63	73.91	398.36	179.11	155.43	61.63	40.63	48.6	143	58	241	58	197	143	21	62	176	62	188	69	152.16	325	300.26	50.16	191.08	264		292	170.17	146.38	55.58
4	21	112	40	37	46	36	44	51	51	5	6	6	78.4	30.36				38	46	141	401	144	224	101	132	115	34	65	82	47	83	82	106	49	68	279.49	137.87	91.6	420.8	155.89	152.75	220.01	361.29	188.36	101.9	58.5
5	78	40	148	19	66	33	29	83	28	33	80	43	237.51	199.78	127.32	86.79	97.96	51.25	26.48	167.91	45.92	24.85	59.59	186	122		118	147	69	99	100	77	176	19	73	81.95	150.86	142.36	172.45	3.46	278.3	97.24	35.37	221.67	47.45	554.24
6	10	12	19	25	56	33	77	55	52	37	46	63	153.77	137.72	46.72	265	87.84	124.5	54.59	64.27	10.77	12.14	391.23	233	216	112	210	123	159	25	39	97	163	211	76	295.09	52.5	71.59	281.05	72.91	12.51	28.74	45.19	151.37	96.57	196.1
